# Supplementary material for: Interpretation of Sedimentary Processes Using Heavy Mineral Unconstrained Data
Source: Preprints.org preprint supplement (doi:10.20944/preprints201810.0280.v1), 2018-10-15
Supplement: Supplementary file 1 [file R_code_S2_code in R for the zero transformation.docx]

**Instructions (in R language) for the substitutuin of zeros of the original data matrix (mineral count)**

Commnets are in *italic*

> load ("WMARG_78_9.RData") *comment: name of the data matrix with zeros with 78 samples and 9 minerals*

> library("zCompositions")

> zPatterns(data[,2:10],label=0, cell.labels=c("Zero","Non-zero"),bar.labels=TRUE)

Patterns ('+' means Zero, '-' means Non-zero)

Patt.ID Am Mi And To Ga Py St Zi Ap No.Unobs Patt.Freq Percent

1 - - - - - - - - - 0 25 32.05

2 - - - - - - - - + 1 16 20.51

3 - - - - - + - - + 2 10 12.82

4 - + - - - - - - + 2 7 8.97

5 - - - - - + - - - 1 5 6.41

6 - - - - - + - + + 3 5 6.41

7 - - - - - + + + + 4 3 3.85

8 - - - - - - - + + 2 2 2.56

9 - - - - + + - + + 4 2 2.56

10 - + - - - - - - - 1 2 2.56

11 - + - - - - - + + 3 1 1.28

Percentage cases by component

Am Mi And To Ga Py St Zi Ap

0.00 12.82 0.00 0.00 2.56 32.05 3.85 16.67 58.97

Overall percentage cases: 14.1>

> dataz <-data

> dataz[,2:10] <-cmultRepl(data[,2:10], label = 0, *comment: zero substitution*

+ method = c("GBM"), output = c("prop"),

+ delta = 0.65, threshold = 0.5, correct = TRUE, t = NULL, s = NULL)

No. corrected values: 22

> dataz

ID Am Mi And To Ga Py

1 P 0.12310287 0.163575042 0.23271501 0.145025295 0.178752108 0.013490725

2 P 0.13087248 0.082214765 0.25000000 0.229865772 0.166107383 0.001677852

3 P 0.16837603 0.018942303 0.29255335 0.229412338 0.136805522 0.008418801

4 P 0.18559557 0.019390582 0.29085873 0.132963989 0.207756233 0.013850416

5 P 0.09696865 0.043326420 0.28265331 0.229011075 0.148547724 0.001429188

6 P 0.11316872 0.069958848 0.23045267 0.224279835 0.154320988 0.002057613

7 P 0.11799223 0.001785714 0.26666245 0.202946640 0.235984465 0.002359845

8 P 0.13636364 0.030303030 0.26363636 0.196969697 0.181818182 0.009090909

9 P 0.26124205 0.117337531 0.34094301 0.135048856 0.011069578 0.001524030

10 P 0.12359551 0.071910112 0.26292135 0.186516854 0.186516854 0.002247191

11 P 0.15204678 0.017543860 0.29824561 0.190058480 0.160818713 0.017543860

12 P 0.24555160 0.056939502 0.21708185 0.170818505 0.138790036 0.021352313

13 P 0.18699187 0.056910569 0.25203252 0.168021680 0.178861789 0.048780488

14 P 0.18149466 0.124555160 0.27046263 0.106761566 0.099644128 0.028469751

15 P 0.11751152 0.050691244 0.27188940 0.223502304 0.209677419 0.013824885

16 P 0.12224109 0.134125637 0.22580645 0.159592530 0.185059423 0.005093379

17 P 0.20578778 0.061093248 0.20257235 0.163987138 0.170418006 0.035369775

18 P 0.18827160 0.018518519 0.29938272 0.129629630 0.157407407 0.040123457

19 P 0.17783505 0.041237113 0.26804124 0.247422680 0.110824742 0.005154639

20 P 0.15658363 0.014234875 0.16370107 0.131672598 0.288256228 0.035587189

21 P 0.17293233 0.005012531 0.16791980 0.125313283 0.273182957 0.130325815

22 P 0.19144144 0.331081081 0.14639640 0.078828829 0.096846847 0.094594595

23 P 0.22383721 0.037790698 0.18023256 0.148255814 0.218023256 0.093023256

24 P 0.16176471 0.172794118 0.13970588 0.121323529 0.165441176 0.040441176

25 P 0.16164384 0.030136986 0.24109589 0.172602740 0.136986301 0.013698630

26 P 0.11675333 0.023827211 0.20967945 0.204914011 0.257333874 0.001639879

27 P 0.23385322 0.060349218 0.21876592 0.162188524 0.173504002 0.041490087

28 P 0.25454545 0.105454545 0.14909091 0.192727273 0.138181818 0.043636364

29 P 0.22188450 0.018237082 0.20972644 0.151975684 0.188449848 0.112462006

30 P 0.16055046 0.059633028 0.15137615 0.114678899 0.220183486 0.055045872

31 A 0.27049063 0.004584587 0.22006017 0.192552651 0.146706782 0.082522565

32 A 0.27987398 0.010904181 0.17446690 0.138119627 0.192640532 0.149023808

33 A 0.19172651 0.023239577 0.29630461 0.220775982 0.122007779 0.069718731

34 A 0.20399808 0.001785714 0.30221937 0.219109046 0.105776781 0.015110969

35 A 0.29980892 0.010519611 0.09993631 0.236691250 0.152534361 0.110455917

36 A 0.28629951 0.054018776 0.17286008 0.253888246 0.102635674 0.010803755

37 A 0.22884015 0.001785714 0.24057554 0.222972455 0.129089316 0.082147747

38 A 0.18621313 0.001785714 0.11698004 0.128916781 0.272157649 0.207699258

39 A 0.13956919 0.001785714 0.30937837 0.218658396 0.193070711 0.002326153

40 A 0.40475300 0.012390398 0.14042451 0.057821857 0.148684775 0.169335439

41 A 0.24156652 0.018946393 0.15157115 0.118414959 0.236829919 0.151571148

42 A 0.15910766 0.009944229 0.16407977 0.134247088 0.218773033 0.228717262

43 A 0.23860721 0.018008091 0.11705259 0.112550569 0.274623387 0.162072819

44 A 0.17845172 0.001785714 0.21748803 0.117108939 0.189604948 0.214699721

45 A 0.21633543 0.004326709 0.16874163 0.250949097 0.190375177 0.125474548

46 A 0.15356739 0.026077481 0.16805488 0.237594827 0.197029856 0.095617430

47 A 0.08983459 0.001785714 0.20803799 0.378250899 0.141844087 0.113475270

48 A 0.30095178 0.006183941 0.03298102 0.055655466 0.292706525 0.263848135

49 A 0.26364524 0.002746305 0.12633001 0.118091095 0.233435886 0.211465449

50 A 0.28222137 0.001785714 0.01045264 0.010452643 0.282221366 0.400684655

51 A 0.30502628 0.004357518 0.07407781 0.056647737 0.257093576 0.270166131

52 A 0.40987818 0.002948764 0.12089932 0.064872806 0.171028306 0.218208528

53 A 0.26587757 0.001785714 0.09383914 0.087583201 0.303413230 0.175166401

54 A 0.41227325 0.020443302 0.07836599 0.057922689 0.183989717 0.201025802

55 A 0.39277108 0.004819277 0.10843373 0.055421687 0.144578313 0.255421687

56 A 0.31576576 0.001785714 0.18630180 0.069468467 0.227351346 0.138936934

57 N 0.28073196 0.287112237 0.19140816 0.159506798 0.038281632 0.001090604

58 N 0.25196864 0.623725645 0.06195950 0.039241017 0.012391900 0.001413342

59 N 0.13928061 0.729640467 0.05697843 0.030071950 0.020575545 0.001092726

60 N 0.26621791 0.529285306 0.07246168 0.061434902 0.048832870 0.001087930

61 N 0.24045522 0.619044280 0.07674103 0.046044616 0.012790171 0.001090604

62 N 0.21422388 0.489373811 0.11202533 0.066822127 0.064856770 0.001349376

63 N 0.17431830 0.099610458 0.25898719 0.206691701 0.124513073 0.001090604

64 N 0.15236997 0.795889942 0.02917723 0.017830528 0.001171171 0.001118327

65 N 0.23691071 0.703211143 0.03948512 0.011281462 0.005640731 0.001291514

66 N 0.07731289 0.892319574 0.01449617 0.008053426 0.004832055 0.001111062

67 N 0.12190081 0.362316289 0.20655415 0.230257081 0.016930668 0.001090604

68 N 0.04188975 0.157892130 0.21911561 0.338340279 0.112780093 0.001090604

69 N 0.02620227 0.090516925 0.10004502 0.474022842 0.161977655 0.001630418

70 N 0.08931905 0.643097180 0.06153090 0.158789427 0.027788150 0.001360066

71 N 0.15560319 0.677985345 0.08335885 0.058351198 0.011114514 0.001090604

72 N 0.10739176 0.598325517 0.13040428 0.105857591 0.029149192 0.001060585

73 N 0.15325389 0.713659905 0.06633377 0.043460058 0.011436857 0.001559747

74 N 0.10691556 0.605854843 0.12473482 0.089096300 0.044548150 0.001090604

75 N 0.19058160 0.708388225 0.06832171 0.023373216 0.001797940 0.001235501

76 N 0.17163592 0.710717769 0.08460926 0.026591481 0.001171171 0.001646759

77 N 0.05313277 0.870049169 0.02324559 0.043170379 0.006641597 0.001090604

78 N 0.05530293 0.030723851 0.08295440 0.531522620 0.144402099 0.001090604

St Zi Ap

1 0.067453626 0.0472175379 0.0286677909

2 0.093959732 0.0285234899 0.0167785235

3 0.113653819 0.0315705052 0.0002673357

4 0.072022161 0.0415512465 0.0360110803

5 0.059831722 0.1217266072 0.0165053027

6 0.100823045 0.0987654321 0.0061728395

7 0.103833164 0.0424772036 0.0259582911

8 0.100000000 0.0484848485 0.0333333333

9 0.068631386 0.0354226508 0.0287809038

10 0.069662921 0.0606741573 0.0359550562

11 0.090643275 0.0526315789 0.0204678363

12 0.071174377 0.0391459075 0.0391459075

13 0.040650407 0.0433604336 0.0243902439

14 0.042704626 0.0569395018 0.0889679715

15 0.087557604 0.0207373272 0.0046082949

16 0.073005093 0.0848896435 0.0101867572

17 0.077170418 0.0482315113 0.0353697749

18 0.077160494 0.0740740741 0.0154320988

19 0.059278351 0.0463917526 0.0438144330

20 0.064056940 0.1032028470 0.0427046263

21 0.070175439 0.0476190476 0.0075187970

22 0.047297297 0.0112612613 0.0022522523

23 0.066860465 0.0145348837 0.0174418605

24 0.062500000 0.0772058824 0.0588235294

25 0.090410959 0.1041095890 0.0493150685

26 0.071481632 0.0881606790 0.0262099316

27 0.056577392 0.0528055659 0.0004660749

28 0.065454545 0.0436363636 0.0072727273

29 0.048632219 0.0121580547 0.0364741641

30 0.105504587 0.1055045872 0.0275229358

31 0.050430456 0.0320921085 0.0005600488

32 0.043616724 0.0109041810 0.0004500706

33 0.058098943 0.0174296828 0.0006981883

34 0.090665812 0.0604438747 0.0008903524

35 0.063117667 0.0262990278 0.0006369429

36 0.070224409 0.0486168982 0.0006526476

37 0.082147747 0.0117353924 0.0007059341

38 0.066845738 0.0190987824 0.0003029078

39 0.113981504 0.0209353783 0.0002945861

40 0.049561592 0.0165205306 0.0005078990

41 0.061575779 0.0189463935 0.0005777430

42 0.069609601 0.0149163432 0.0006050081

43 0.058526296 0.0180080910 0.0005509514

44 0.066919393 0.0111532322 0.0027883081

45 0.038940377 0.0043267086 0.0005303209

46 0.089822434 0.0318724767 0.0003632298

47 0.052009499 0.0141844087 0.0005775401

48 0.028858390 0.0185518220 0.0002629249

49 0.038448263 0.0054926091 0.0003451491

50 0.010452643 0.0012940842 0.0004348848

51 0.030502628 0.0015929902 0.0005353339

52 0.008846292 0.0029487639 0.0003690398

53 0.050047543 0.0218958001 0.0003913941

54 0.044293821 0.0012614931 0.0004239323

55 0.031325301 0.0048192771 0.0024096386

56 0.047364864 0.0126306303 0.0003944901

57 0.031901360 0.0095704079 0.0003968389

58 0.008261267 0.0007774290 0.0002612597

59 0.001582734 0.0205755446 0.0002019929

60 0.012602031 0.0078762694 0.0002011064

61 0.002558034 0.0009550885 0.0003209632

62 0.027514993 0.0235842801 0.0002494353

63 0.042334445 0.0921396741 0.0003145498

64 0.001620957 0.0006151519 0.0002067255

65 0.001230171 0.0007104154 0.0002387394

66 0.001058291 0.0006111556 0.0002053825

67 0.054178137 0.0033861335 0.0033861335

68 0.083779498 0.0354451721 0.0096668651

69 0.133393363 0.0119101217 0.0003013867

70 0.015878943 0.0019848678 0.0002514114

71 0.011114514 0.0010342209 0.0003475561

72 0.024546688 0.0030683360 0.0001960517

73 0.009149486 0.0008579607 0.0002883229

74 0.017819260 0.0089096300 0.0010308318

75 0.005393819 0.0006796047 0.0002283852

76 0.002417407 0.0009058232 0.0003044073

77 0.001030111 0.0012273280 0.0004124510

78 0.122895404 0.0307238509 0.0003842420 *comment: new data matrix without zeros*

> write.table(dataz, file="WMARG_78_9.txt") *comment: saving the new data matrix in txt format*


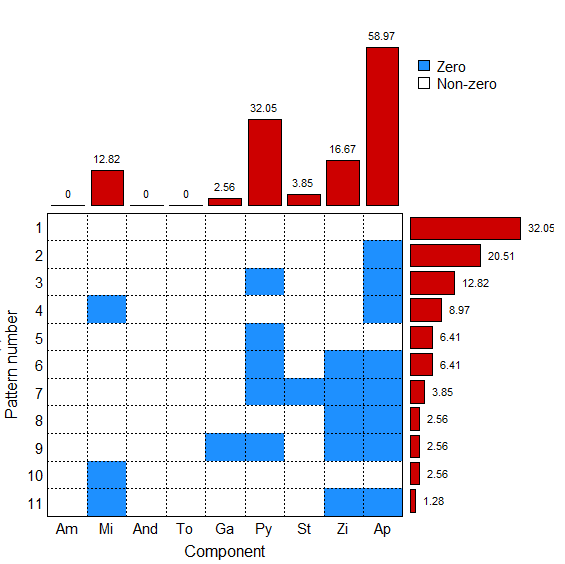


*Comment (caption of the figure represented above): graphical representation of the zero-distribution pattern. Amphiboles (Am), andalusite (And) and tourmaline (To) have no zeros, that is, they are always present (bar chart on top of this figure). The other minerals always present zeros in at least one of the studied samples. Most of the samples have only one zero (32.05 %) or two zeros (20.51 %) – see bar chart on the right of this figure.*
