# Supplementary material for: Interpretation of Sedimentary Processes Using Heavy Mineral Unconstrained Data
Source: Preprints.org preprint supplement (doi:10.20944/preprints201810.0280.v1), 2018-10-15
Supplement: Supplementary file 1 [file supplementary]

| DATA MATRIX WITH clr TRANSFORMATION |          |                 |            |                                |         |         |         |         |         |         |         |         |
|-------------------------------------|----------|-----------------|------------|--------------------------------|---------|---------|---------|---------|---------|---------|---------|---------|
| Original ID                         | Paper ID | UTM coordinates |            | main heavy minerals (CLR data) |         |         |         |         |         |         |         |         |
|                                     |          | X               | Y          | clr.Am                         | clr.Mi  | clr.And | clr.To  | clr.Ga  | clr.Py  | clr.St  | clr.Zi  | clr.Ap  |
| 6562                                | P        | 490354.99       | 4593506.13 | 0.4189                         | 0.7032  | 1.0557  | 0.5828  | 0.7919  | -1.7921 | -0.1827 | -0.5393 | -1.0383 |
| 6564                                | P        | 486670.07       | 4593652.17 | 0.8091                         | 0.3442  | 1.4563  | 1.3723  | 1.0475  | -3.5476 | 0.4777  | -0.7144 | -1.2451 |
| 6566                                | P        | 482637.53       | 4593613.26 | 1.4488                         | -0.7360 | 2.0012  | 1.7581  | 1.2411  | -1.5470 | 1.0557  | -0.2252 | -4.9967 |
| 6609                                | P        | 484715.54       | 4588225.68 | 0.9676                         | -1.2912 | 1.4169  | 0.6341  | 1.0804  | -1.6276 | 0.0210  | -0.5290 | -0.6721 |
| 6611                                | P        | 488619.68       | 4588416.33 | 0.5215                         | -0.2841 | 1.5913  | 1.3809  | 0.9480  | -3.6958 | 0.0386  | 0.7489  | -1.2492 |
| 6613                                | P        | 492067.65       | 4588254.38 | 0.6604                         | 0.1794  | 1.3715  | 1.3444  | 0.9705  | -3.3470 | 0.5449  | 0.5242  | -2.2484 |
| 6638                                | P        | 489860.57       | 4586354.32 | 0.9684                         | -3.2224 | 1.7838  | 1.5107  | 1.6615  | -2.9436 | 0.8406  | -0.0533 | -0.5457 |
| 6640                                | P        | 486240.29       | 4586227.57 | 0.6278                         | -0.8762 | 1.2871  | 0.9956  | 0.9155  | -2.0802 | 0.3177  | -0.4062 | -0.7809 |
| 6643                                | P        | 482174.27       | 4586337.17 | 1.6711                         | 0.8707  | 1.9374  | 1.0113  | -1.4902 | -3.4730 | 0.3344  | -0.3270 | -0.5346 |
| 6676                                | P        | 492478.36       | 4582680.31 | 0.6101                         | 0.0685  | 1.3649  | 1.0216  | 1.0216  | -3.3973 | 0.0367  | -0.1014 | -0.6247 |
| 6678                                | P        | 488659.62       | 4582631.99 | 0.7722                         | -1.3873 | 1.4459  | 0.9953  | 0.8283  | -1.3873 | 0.2549  | -0.2887 | -1.2332 |
| 6680                                | P        | 484941.28       | 4582646.90 | 1.0968                         | -0.3647 | 0.9736  | 0.7339  | 0.5263  | -1.3455 | -0.1416 | -0.7394 | -0.7394 |
| 6683                                | P        | 482044.92       | 4583458.87 | 0.8234                         | -0.3662 | 1.1219  | 0.7164  | 0.7790  | -0.5203 | -0.7026 | -0.6381 | -1.2135 |
| 6689                                | P        | 486900.24       | 4580758.82 | 0.6977                         | 0.3212  | 1.0966  | 0.1671  | 0.0981  | -1.1547 | -0.7492 | -0.4615 | -0.0152 |
| 6691                                | P        | 490415.22       | 4580612.36 | 0.6875                         | -0.1533 | 1.5264  | 1.3304  | 1.2665  | -1.4526 | 0.3933  | -1.0471 | -2.5512 |
| 6694                                | P        | 494167.81       | 4581045.45 | 0.5728                         | 0.6656  | 1.1865  | 0.8394  | 0.9875  | -2.6052 | 0.0573  | 0.2082  | -1.9121 |
| 6726                                | P        | 487324.59       | 4578933.20 | 0.8444                         | -0.3701 | 0.8286  | 0.6173  | 0.6558  | -0.9166 | -0.1364 | -0.6064 | -0.9166 |
| 6735                                | P        | 490961.02       | 4576886.34 | 0.9200                         | -1.3991 | 1.3838  | 0.5468  | 0.7409  | -0.6260 | 0.0280  | -0.0129 | -1.5815 |
| 6764                                | P        | 493208.86       | 4575133.16 | 0.9531                         | -0.5084 | 1.3634  | 1.2834  | 0.4802  | -2.5878 | -0.1455 | -0.3906 | -0.4478 |
| 6766                                | P        | 489571.54       | 4575328.05 | 0.6676                         | -1.7303 | 0.7120  | 0.4943  | 1.2778  | -0.8140 | -0.2263 | 0.2507  | -0.6317 |
| 6770                                | P        | 485961.39       | 4575204.96 | 1.0050                         | -2.5359 | 0.9756  | 0.6829  | 1.4623  | 0.7222  | 0.1031  | -0.2847 | -2.1305 |
| 6772                                | P        | 482199.23       | 4575660.59 | 1.1854                         | 1.7331  | 0.9171  | 0.2981  | 0.5039  | 0.4804  | -0.2128 | -1.6479 | -3.2573 |
| 6778                                | P        | 484577.55       | 4573607.83 | 1.0896                         | -0.6892 | 0.8730  | 0.6776  | 1.0633  | 0.2116  | -0.1187 | -1.6447 | -1.4624 |
| 6780                                | P        | 488504.39       | 4573947.92 | 0.4927                         | 0.5587  | 0.3461  | 0.2050  | 0.5152  | -0.8936 | -0.4583 | -0.2470 | -0.5189 |
| 6781                                | P        | 490349.01       | 4573646.32 | 0.6729                         | -1.0068 | 1.0727  | 0.7385  | 0.5074  | -1.7952 | 0.0919  | 0.2329  | -0.5143 |
| 6783                                | P        | 493891.17       | 4573831.81 | 0.6869                         | -0.9024 | 1.2724  | 1.2494  | 1.4772  | -3.5786 | 0.1962  | 0.4060  | -0.8071 |
| 6819                                | P        | 485409.83       | 4571467.82 | 1.4378                         | 0.0833  | 1.3711  | 1.0719  | 1.1393  | -0.2914 | 0.0187  | -0.0503 | -4.7803 |
| 6822                                | P        | 480461.14       | 4571119.03 | 1.1940                         | 0.3128  | 0.6591  | 0.9158  | 0.5831  | -0.5696 | -0.1641 | -0.5696 | -2.3614 |
| 6827                                | P        | 482109.50       | 4569654.81 | 1.1115                         | -1.3872 | 1.0552  | 0.7331  | 0.9482  | 0.4320  | -0.4063 | -1.7926 | -0.6940 |
| 6831                                | P        | 487634.46       | 4569898.77 | 0.5271                         | -0.4633 | 0.4682  | 0.1906  | 0.8429  | -0.5434 | 0.1072  | 0.1072  | -1.2365 |
| 8664                                | A        | 478783.81       | 4508174.07 | 1.8238                         | -2.2538 | 1.6174  | 1.4839  | 1.2120  | 0.6366  | 0.1441  | -0.3079 | -4.3562 |
| 8671                                | A        | 480242.04       | 4506169.79 | 1.8849                         | -1.3602 | 1.4123  | 1.1787  | 1.5114  | 1.2547  | 0.0261  | -1.3602 | -4.5477 |
| 8673                                | A        | 483710.14       | 4506061.68 | 1.3561                         | -0.7542 | 1.7914  | 1.4971  | 0.9041  | 0.3445  | 0.1621  | -1.0418 | -4.2593 |
| 8689                                | A        | 474241.99       | 4502056.74 | 1.6661                         | -3.0722 | 2.0591  | 1.7376  | 1.0093  | -0.9366 | 0.8552  | 0.4497  | -3.7682 |
| 8692                                | A        | 479476.85       | 4502137.08 | 1.8339                         | -1.5160 | 0.7353  | 1.5975  | 1.1582  | 0.8354  | 0.2758  | -0.5997 | -4.3203 |
| 8792                                | A        | 485448.17       | 4500373.99 | 1.7620                         | 0.0942  | 1.2574  | 1.6418  | 0.7361  | -1.5152 | 0.3566  | -0.0111 | -4.3218 |
| 8794                                | A        | 481888.28       | 4500227.78 | 1.8003                         | -3.0529 | 1.8503  | 1.7743  | 1.2277  | 0.7758  | 0.7758  | -1.1702 | -3.9810 |
| 8881                                | A        | 479076.84       | 4490884.30 | 1.6349                         | -3.0122 | 1.1700  | 1.2672  | 2.0144  | 1.7441  | 0.6104  | -0.6424 | -4.7863 |
| 8885                                | A        | 484555.46       | 4490925.78 | 1.6827                         | -2.6761 | 2.4787  | 2.1316  | 2.0072  | -2.4117 | 1.4801  | -0.2145 | -4.4781 |
| 8971                                | A        | 470577.20       | 4500918.99 | 2.2604                         | -1.2260 | 1.2017  | 0.3144  | 1.2589  | 1.3890  | 0.1603  | -0.9383 | -4.4204 |
| 8980                                | A        | 476051.18       | 4494454.96 | 1.5732                         | -0.9723 | 1.1071  | 0.8602  | 1.5534  | 1.1071  | 0.2063  | -0.9723 | -4.4626 |
| 8985                                | A        | 473375.55       | 4492836.00 | 1.2218                         | -1.5508 | 1.2526  | 1.0519  | 1.5403  | 1.5847  | 0.3951  | -1.1453 | -4.3503 |
| 8988                                | A        | 470006.47       | 4490970.98 | 1.5949                         | -0.9891 | 0.8827  | 0.8435  | 1.7355  | 1.2081  | 0.1896  | -0.9891 | -4.4760 |
| 8989                                | A        | 471998.23       | 4491015.65 | 1.3883                         | -3.2162 | 1.5861  | 0.9671  | 1.4489  | 1.5732  | 0.4075  | -1.3843 | -2.7706 |
| 8992                                | A        | 477142.51       | 4490887.11 | 1.8136                         | -2.0984 | 1.5652  | 1.9620  | 1.6858  | 1.2689  | 0.0988  | -2.0984 | -4.1975 |
| 8994                                | A        | 480525.89       | 4489005.89 | 1.0696                         | -0.7034 | 1.1598  | 1.5061  | 1.3188  | 0.5958  | 0.5333  | -0.5028 | -4.9772 |
| 8996                                | A        | 475396.75       | 4489141.30 | 0.9322                         | -2.9860 | 1.7719  | 2.3698  | 1.3890  | 1.1658  | 0.3857  | -0.9136 | -4.1148 |
| 9000                                | A        | 468038.30       | 4489304.86 | 2.2352                         | -1.6498 | 0.0242  | 0.5474  | 2.2074  | 2.1036  | -0.1093 | -0.5512 | -4.8076 |
| 9003                                | A        | 465183.22       | 4487313.40 | 2.0978                         | -2.4665 | 1.3621  | 1.2947  | 1.9761  | 1.8773  | 0.1725  | -1.7734 | -4.5406 |
| 9004                                | A        | 467065.20       | 4487304.85 | 2.9400                         | -2.1229 | -0.3558 | -0.3558 | 2.9400  | 3.2905  | -0.3558 | -2.4449 | -3.5353 |
| 9034                                | A        | 464314.24       | 4485649.38 | 2.3936                         | -1.8549 | 0.9783  | 0.7100  | 2.2226  | 2.2722  | 0.0910  | -2.8612 | -3.9517 |
| 9036                                | A        | 461476.99       | 4485752.88 | 2.8096                         | -2.1249 | 1.5887  | 0.9662  | 1.9356  | 2.1792  | -1.0263 | -2.1249 | -4.2031 |
| 9076                                | A        | 460737.78       | 4481652.70 | 2.0142                         | -2.9890 | 0.9728  | 0.9038  | 2.1463  | 1.5969  | 0.3442  | -0.4825 | -4.5068 |
| 9079                                | A        | 455895.18       | 4482102.10 | 2.5613                         | -0.4427 | 0.9010  | 0.5988  | 1.7545  | 1.8431  | 0.3305  | -3.2280 | -4.3185 |
| 9126                                | A        | 457910.55       | 4477523.95 | 2.3443                         | -2.0563 | 1.0572  | 0.3861  | 1.3449  | 1.9140  | -0.1845 | -2.0563 | -2.7494 |
| 9129                                | A        | 452886.18       | 4477566.20 | 2.2408                         | -2.9343 | 1.7132  | 0.7267  | 1.9123  | 1.4199  | 0.3437  | -0.9780 | -4.4443 |
| P27                                 | N        | 487978.47       | 4382262.20 | 2.2871                         | 2.3096  | 1.9041  | 1.7218  | 0.2947  | -3.2636 | 0.1124  | -1.0916 | -4.2745 |
| P26                                 | N        | 489695.84       | 4382259.72 | 2.9580                         | 3.8644  | 1.5552  | 1.0984  | -0.0543 | -2.2254 | -0.4597 | -2.8231 | -3.9136 |
| P25                                 | N        | 492271.88       | 4382256.71 | 2.2730                         | 3.9290  | 1.3791  | 0.7401  | 0.3606  | -2.5749 | -2.2044 | 0.3606  | -4.2631 |
| P24                                 | N        | 493130.56       | 4382255.90 | 2.5595                         | 3.2467  | 1.2582  | 1.0932  | 0.8636  | -2.9405 | -0.4910 | -0.9610 | -4.6287 |
| P20                                 | N        | 492284.11       | 4394464.89 | 2.9855                         | 3.9312  | 1.8434  | 1.3326  | 0.0517  | -2.4103 | -1.5578 | -2.5430 | -3.6334 |
| P21                                 | N        | 489706.21       | 4390028.53 | 2.0293                         | 2.8554  | 1.3810  | 0.8643  | 0.8345  | -3.0381 | -0.0230 | -0.1771 | -4.7263 |
| P22                                 | N        | 488843.58       | 4386700.22 | 1.5305                         | 0.9709  | 1.9264  | 1.7008  | 1.1940  | -3.5437 | 0.1152  | 0.8929  | -4.7870 |
| P23                                 | N        | 487121.65       | 4383373.41 | 3.1762                         | 4.8294  | 1.5233  | 1.0308  | -1.6921 | -1.7382 | -1.3671 | -2.3360 | -3.4264 |
| P28                                 | N        | 486261.11       | 4382265.07 | 3.4076                         | 4.4955  | 1.6158  | 0.3630  | -0.3301 | -1.8043 | -1.8530 | -2.4020 | -3.4925 |
| P29                                 | N        | 486259.14       | 4381155.24 | 2.6186                         | 5.0645  | 0.9446  | 0.3568  | -0.1540 | -1.6240 | -1.6726 | -2.2217 | -3.3122 |
| P30                                 | N        | 485398.24       | 4380046.00 | 1.3795                         | 2.4689  | 1.9069  | 2.0155  | -0.5945 | -3.3369 | 0.5686  | -2.2040 | -2.2040 |
| P32                                 | N        | 483671.01       | 4375611.17 | -0.1636                        | 1.1633  | 1.4910  | 1.9254  | 0.8268  | -3.8119 | 0.5296  | -0.3306 | -1.6299 |
| P34                                 | N        | 481944.40       | 4372285.56 | -0.0993                        | 1.1404  | 1.2405  | 2.7962  | 1.7224  | -2.8763 | 1.5282  | -0.8877 | -4.5645 |
| P33                                 | N        | 481092.74       | 4375617.04 | 1.6203                         | 3.5943  | 1.2476  | 2.1956  | 0.4526  | -2.5644 | -0.1070 | -2.1864 | -4.2526 |
| P31                                 | N        | 479382.78       | 4378950.88 | 2.3877                         | 3.8596  | 1.7636  | 1.4069  | -0.2513 | -2.5728 | -0.2513 | -2.6259 | -3.7164 |
| P15                                 | N        | 483713.25       | 4395588.12 | 1.7068                         | 3.4245  | 1.9010  | 1.6924  | 0.4028  | -2.9108 | 0.2309  | -1.8485 | -4.5990 |
| P16                                 | N        | 482851.10       | 4393370.29 | 2.4468                         | 3.9852  | 1.6095  | 1.1866  | -0.1484 | -2.1407 | -0.3716 | -2.7384 | -3.8289 |
| P17                                 | N        | 481991.06       | 4392262.40 | 1.4081                         | 3.1427  | 1.5622  | 1.2258  | 0.5326  | -3.1772 | -0.3837 | -1.0768 | -3.2336 |
| P18                                 | N        | 480270.23       | 4390046.93 | 3.0490                         | 4.3620  | 2.0232  | 0.9506  | -1.6144 | -1.9896 | -0.5158 | -2.5873 | -3.6778 |
| P19                                 | N        | 478548.42       | 4387831.84 | 2.9585                         | 4.3794  | 2.2512  | 1.0938  | -2.0288 | -1.6880 | -1.3041 | -2.2857 | -3.3762 |
| P35                                 | N        | 471630.96       | 4373426.29 | 1.8637                         | 4.6595  | 1.0371  | 1.6561  | -0.2157 | -2.0223 | -2.0794 | -1.9042 | -2.9947 |
| P36                                 | N        | 477623.03       | 4364528.16 | 0.6271                         | 0.0394  | 1.0326  | 2.8901  | 1.5869  | -3.2989 | 1.4257  | 0.0394  | -4.3422 |
