# Supplementary material for: Interpretation of Sedimentary Processes Using Heavy Mineral Unconstrained Data
Source: Preprints.org preprint supplement (doi:10.20944/preprints201810.0280.v1), 2018-10-15
Supplement: Supplementary file 3 [file supplementary]

| MAIN HEAVY MINERAL SUITE |          |                 |            |                                  |     |     |     |     |    |    |    |    |     |                                   |       |       |       |       |       |       |       |      |        |
|--------------------------|----------|-----------------|------------|----------------------------------|-----|-----|-----|-----|----|----|----|----|-----|-----------------------------------|-------|-------|-------|-------|-------|-------|-------|------|--------|
|                          |          | UTM coordinates |            | main heavy minerals (count data) |     |     |     |     |    |    |    |    |     | main heavy minerals (percentages) |       |       |       |       |       |       |       |      |        |
| Original ID              | Paper ID | X               | Y          | Am                               | Mi  | And | To  | Ga  | Py | St | Zi | Ap | sum | Am                                | Mi    | And   | To    | Ga    | Py    | St    | Zi    | Ap   | sum    |
| 6562                     | P        | 490354.99       | 4593506.13 | 73                               | 97  | 138 | 86  | 106 | 8  | 40 | 28 | 17 | 593 | 12.31                             | 16.36 | 23.27 | 14.50 | 17.88 | 1.35  | 6.75  | 4.72  | 2.87 | 100.00 |
| 6564                     | P        | 486670.07       | 4593652.17 | 78                               | 49  | 149 | 137 | 99  | 1  | 56 | 17 | 10 | 596 | 13.09                             | 8.22  | 25.00 | 22.99 | 16.61 | 0.17  | 9.40  | 2.85  | 1.68 | 100.00 |
| 6566                     | P        | 482637.53       | 4593613.26 | 80                               | 9   | 139 | 109 | 65  | 4  | 54 | 15 | 0  | 475 | 16.84                             | 1.89  | 29.26 | 22.95 | 13.68 | 0.84  | 11.37 | 3.16  | 0.00 | 100.00 |
| 6609                     | P        | 484715.54       | 4588225.68 | 67                               | 7   | 105 | 48  | 75  | 5  | 26 | 15 | 13 | 361 | 18.56                             | 1.94  | 29.09 | 13.30 | 20.78 | 1.39  | 7.20  | 4.16  | 3.60 | 100.00 |
| 6611                     | P        | 488619.68       | 4588416.33 | 47                               | 21  | 137 | 111 | 72  | 0  | 29 | 59 | 8  | 484 | 9.71                              | 4.34  | 28.31 | 22.93 | 14.88 | 0.00  | 5.99  | 12.19 | 1.65 | 100.00 |
| 6613                     | P        | 492067.65       | 4588254.38 | 55                               | 34  | 112 | 109 | 75  | 1  | 49 | 48 | 3  | 486 | 11.32                             | 7.00  | 23.05 | 22.43 | 15.43 | 0.21  | 10.08 | 9.88  | 0.62 | 100.00 |
| 6638                     | P        | 489860.57       | 4586354.32 | 50                               | 0   | 113 | 86  | 100 | 1  | 44 | 18 | 11 | 423 | 11.82                             | 0.00  | 26.71 | 20.33 | 23.64 | 0.24  | 10.40 | 4.26  | 2.60 | 100.00 |
| 6640                     | P        | 486240.29       | 4586227.57 | 45                               | 10  | 87  | 65  | 60  | 3  | 33 | 16 | 11 | 330 | 13.64                             | 3.03  | 26.36 | 19.70 | 18.18 | 0.91  | 10.00 | 4.85  | 3.33 | 100.00 |
| 6643                     | P        | 482174.27       | 4586337.17 | 118                              | 53  | 154 | 61  | 5   | 0  | 31 | 16 | 13 | 451 | 26.16                             | 11.75 | 34.15 | 13.53 | 1.11  | 0.00  | 6.87  | 3.55  | 2.88 | 100.00 |
| 6676                     | P        | 492478.36       | 4582680.31 | 55                               | 32  | 117 | 83  | 83  | 1  | 31 | 27 | 16 | 445 | 12.36                             | 7.19  | 26.29 | 18.65 | 18.65 | 0.22  | 6.97  | 6.07  | 3.60 | 100.00 |
| 6678                     | P        | 488659.62       | 4582631.99 | 52                               | 6   | 102 | 65  | 55  | 6  | 31 | 18 | 7  | 342 | 15.20                             | 1.75  | 29.82 | 19.01 | 16.08 | 1.75  | 9.06  | 5.26  | 2.05 | 100.00 |
| 6680                     | P        | 484941.28       | 4582646.90 | 69                               | 16  | 61  | 48  | 39  | 6  | 20 | 11 | 11 | 281 | 24.56                             | 5.69  | 21.71 | 17.08 | 13.88 | 2.14  | 7.12  | 3.91  | 3.91 | 100.00 |
| 6683                     | P        | 482044.92       | 4583458.87 | 69                               | 21  | 93  | 62  | 66  | 18 | 15 | 16 | 9  | 369 | 18.70                             | 5.69  | 25.20 | 16.80 | 17.89 | 4.88  | 4.07  | 4.34  | 2.44 | 100.00 |
| 6689                     | P        | 486900.24       | 4580758.82 | 51                               | 35  | 76  | 30  | 28  | 8  | 12 | 16 | 25 | 281 | 18.15                             | 12.46 | 27.05 | 10.68 | 9.96  | 2.85  | 4.27  | 5.69  | 8.90 | 100.00 |
| 6691                     | P        | 490415.22       | 4580612.36 | 51                               | 22  | 118 | 97  | 91  | 6  | 38 | 9  | 2  | 434 | 11.75                             | 5.07  | 27.19 | 22.35 | 20.97 | 1.38  | 8.76  | 2.07  | 0.46 | 100.00 |
| 6694                     | P        | 494167.81       | 4581045.45 | 72                               | 79  | 133 | 94  | 109 | 3  | 43 | 50 | 6  | 589 | 12.22                             | 13.41 | 22.58 | 15.96 | 18.51 | 0.51  | 7.30  | 8.49  | 1.02 | 100.00 |
| 6726                     | P        | 487324.59       | 4578933.20 | 64                               | 19  | 63  | 51  | 53  | 11 | 24 | 15 | 11 | 311 | 20.58                             | 6.11  | 20.26 | 16.40 | 17.04 | 3.54  | 7.72  | 4.82  | 3.54 | 100.00 |
| 6735                     | P        | 490961.02       | 4576886.34 | 61                               | 6   | 97  | 42  | 51  | 13 | 25 | 24 | 5  | 324 | 18.83                             | 1.85  | 29.94 | 12.96 | 15.74 | 4.01  | 7.72  | 7.41  | 1.54 | 100.00 |
| 6764                     | P        | 493208.86       | 4575133.16 | 69                               | 16  | 104 | 96  | 43  | 2  | 23 | 18 | 17 | 388 | 17.78                             | 4.12  | 26.80 | 24.74 | 11.08 | 0.52  | 5.93  | 4.64  | 4.38 | 100.00 |
| 6766                     | P        | 489571.54       | 4575328.05 | 44                               | 4   | 46  | 37  | 81  | 10 | 18 | 29 | 12 | 281 | 15.66                             | 1.42  | 16.37 | 13.17 | 28.83 | 3.56  | 6.41  | 10.32 | 4.27 | 100.00 |
| 6770                     | P        | 485961.39       | 4575204.96 | 69                               | 2   | 67  | 50  | 109 | 52 | 28 | 19 | 3  | 399 | 17.29                             | 0.50  | 16.79 | 12.53 | 27.32 | 13.03 | 7.02  | 4.76  | 0.75 | 100.00 |
| 6772                     | P        | 482199.23       | 4575660.59 | 85                               | 147 | 65  | 35  | 43  | 42 | 21 | 5  | 1  | 444 | 19.14                             | 33.11 | 14.64 | 7.88  | 9.68  | 9.46  | 4.73  | 1.13  | 0.23 | 100.00 |
| 6778                     | P        | 484577.55       | 4573607.83 | 77                               | 13  | 62  | 51  | 75  | 32 | 23 | 5  | 6  | 344 | 22.38                             | 3.78  | 18.02 | 14.83 | 21.80 | 9.30  | 6.69  | 1.45  | 1.74 | 100.00 |
| 6780                     | P        | 488504.39       | 4573947.92 | 44                               | 47  | 38  | 33  | 45  | 11 | 17 | 21 | 16 | 272 | 16.18                             | 17.28 | 13.97 | 12.13 | 16.54 | 4.04  | 6.25  | 7.72  | 5.88 | 100.00 |
| 6781                     | P        | 490349.01       | 4573646.32 | 59                               | 11  | 88  | 63  | 50  | 5  | 33 | 38 | 18 | 365 | 16.16                             | 3.01  | 24.11 | 17.26 | 13.70 | 1.37  | 9.04  | 10.41 | 4.93 | 100.00 |
| 6783                     | P        | 493891.17       | 4573831.81 | 49                               | 10  | 88  | 86  | 108 | 0  | 30 | 37 | 11 | 419 | 11.69                             | 2.39  | 21.00 | 20.53 | 25.78 | 0.00  | 7.16  | 8.83  | 2.63 | 100.00 |
| 6819                     | P        | 485409.83       | 4571467.82 | 62                               | 16  | 58  | 43  | 46  | 11 | 15 | 14 | 0  | 265 | 23.40                             | 6.04  | 21.89 | 16.23 | 17.36 | 4.15  | 5.66  | 5.28  | 0.00 | 100.00 |
| 6822                     | P        | 480461.14       | 4571119.03 | 70                               | 29  | 41  | 53  | 38  | 12 | 18 | 12 | 2  | 275 | 25.45                             | 10.55 | 14.91 | 19.27 | 13.82 | 4.36  | 6.55  | 4.36  | 0.73 | 100.00 |
| 6827                     | P        | 482109.50       | 4569654.81 | 73                               | 6   | 69  | 50  | 62  | 37 | 16 | 4  | 12 | 329 | 22.19                             | 1.82  | 20.97 | 15.20 | 18.84 | 11.25 | 4.86  | 1.22  | 3.65 | 100.00 |
| 6831                     | P        | 487634.46       | 4569898.77 | 35                               | 13  | 33  | 25  | 48  | 12 | 23 | 23 | 6  | 218 | 16.06                             | 5.96  | 15.14 | 11.47 | 22.02 | 5.50  | 10.55 | 10.55 | 2.75 | 100.00 |
| 8664                     | A        | 478783.81       | 4508174.07 | 59                               | 1   | 48  | 42  | 32  | 18 | 11 | 7  | 0  | 218 | 27.06                             | 0.46  | 22.02 | 19.27 | 14.68 | 8.26  | 5.05  | 3.21  | 0.00 | 100.00 |
| 8671                     | A        | 480242.04       | 4506169.79 | 77                               | 3   | 48  | 38  | 53  | 41 | 12 | 3  | 0  | 275 | 28.00                             | 1.09  | 17.45 | 13.82 | 19.27 | 14.91 | 4.36  | 1.09  | 0.00 | 100.00 |
| 8673                     | A        | 483710.14       | 4506061.68 | 33                               | 4   | 51  | 38  | 21  | 12 | 10 | 3  | 0  | 172 | 19.19                             | 2.33  | 29.65 | 22.09 | 12.21 | 6.98  | 5.81  | 1.74  | 0.00 | 100.00 |
| 8689                     | A        | 474241.99       | 4502056.74 | 27                               | 0   | 40  | 29  | 14  | 2  | 12 | 8  | 0  | 132 | 20.45                             | 0.00  | 30.30 | 21.97 | 10.61 | 1.52  | 9.09  | 6.06  | 0.00 | 100.00 |
| 8692                     | A        | 479476.85       | 4502137.08 | 57                               | 2   | 19  | 45  | 29  | 21 | 12 | 5  | 0  | 190 | 30.00                             | 1.05  | 10.00 | 23.68 | 15.26 | 11.05 | 6.32  | 2.63  | 0.00 | 100.00 |
| 8792                     | A        | 485448.17       | 4500373.99 | 53                               | 10  | 32  | 47  | 19  | 2  | 13 | 9  | 0  | 185 | 28.65                             | 5.41  | 17.30 | 25.41 | 10.27 | 1.08  | 7.03  | 4.86  | 0.00 | 100.00 |
| 8794                     | A        | 481888.28       | 4500227.78 | 39                               | 0   | 41  | 38  | 22  | 14 | 14 | 2  | 0  | 170 | 22.94                             | 0.00  | 24.12 | 22.35 | 12.94 | 8.24  | 8.24  | 1.18  | 0.00 | 100.00 |
| 8881                     | A        | 479076.84       | 4490884.30 | 78                               | 0   | 49  | 54  | 114 | 87 | 28 | 8  | 0  | 418 | 18.66                             | 0.00  | 11.72 | 12.92 | 27.27 | 20.81 | 6.70  | 1.91  | 0.00 | 100.00 |
| 8885                     | A        | 484555.46       | 4490925.78 | 60                               | 0   | 133 | 94  | 83  | 1  | 49 | 9  | 0  | 429 | 13.99                             | 0.00  | 31.00 | 21.91 | 19.35 | 0.23  | 11.42 | 2.10  | 0.00 | 100.00 |
| 8971                     | A        | 470577.20       | 4500918.99 | 98                               | 3   | 34  | 14  | 36  | 41 | 12 | 4  | 0  | 242 | 40.50                             | 1.24  | 14.05 | 5.79  | 14.88 | 16.94 | 4.96  | 1.65  | 0.00 | 100.00 |
| 8980                     | A        | 476051.18       | 4494454.96 | 51                               | 4   | 32  | 25  | 50  | 32 | 13 | 4  | 0  | 211 | 24.17                             | 1.90  | 15.17 | 11.85 | 23.70 | 15.17 | 6.16  | 1.90  | 0.00 | 100.00 |
| 8985                     | A        | 473375.55       | 4492836.00 | 32                               | 2   | 33  | 27  | 44  | 46 | 14 | 3  | 0  | 201 | 15.92                             | 1.00  | 16.42 | 13.43 | 21.89 | 22.89 | 6.97  | 1.49  | 0.00 | 100.00 |
| 8988                     | A        | 470006.47       | 4490970.98 | 53                               | 4   | 26  | 25  | 61  | 36 | 13 | 4  | 0  | 222 | 23.87                             | 1.80  | 11.71 | 11.26 | 27.48 | 16.22 | 5.86  | 1.80  | 0.00 | 100.00 |
| 8989                     | A        | 471998.23       | 4491015.65 | 64                               | 0   | 78  | 42  | 68  | 77 | 24 | 4  | 1  | 358 | 17.88                             | 0.00  | 21.79 |       |       |       |       |       |      |        |
