# Supplementary material for: Interpretation of Sedimentary Processes Using Heavy Mineral Unconstrained Data
Source: Preprints.org preprint supplement (doi:10.20944/preprints201810.0280.v1), 2018-10-15
Supplement: Supplementary file 3 [file Table S4_data matrix with clr transformation.xlsx]

## Sheet: data
DATA MATRIX WITH clr TRANSFORMATION
		UTM coordinates		main heavy minerals (CLR data)
Original ID	Paper ID	X	Y	clr.Am	clr.Mi	clr.And	clr.To	clr.Ga	clr.Py	clr.St	clr.Zi	clr.Ap	sum
6562	P	490355	4.59351e+06	0.41891	0.703161	1.0557	0.582797	0.791889	-1.79211	-0.18267	-0.539345	-1.03834	0
6564	P	486670	4.59365e+06	0.809073	0.344184	1.45631	1.37234	1.04748	-3.54764	0.477715	-0.714423	-1.24505	-2.22045e-15
6566	P	482638	4.59361e+06	1.44876	-0.736038	2.00121	1.75809	1.24112	-1.54697	1.05572	-0.225213	-4.99669	0
6609	P	484716	4.58823e+06	0.967605	-1.29118	1.41687	0.634114	1.0804	-1.62765	0.0210092	-0.529037	-0.672138	-8.88178e-16
6611	P	488620	4.58842e+06	0.521482	-0.284143	1.59132	1.38086	0.948001	-3.6958	0.0386304	0.748872	-1.24922	0
6613	P	492068	4.58825e+06	0.660371	0.179398	1.37154	1.34439	0.970526	-3.34696	0.544858	0.524239	-2.24835	0
6638	P	489861	4.58635e+06	0.9684	-3.2224	1.78376	1.51072	1.66155	-2.94362	0.840567	-0.0532513	-0.545728	0
6640	P	486240	4.58623e+06	0.62783	-0.876247	1.28708	0.995555	0.915512	-2.08022	0.317675	-0.406244	-0.780937	2.66454e-15
6643	P	482174	4.58634e+06	1.67109	0.870696	1.93736	1.01128	-1.49016	-3.473	0.334391	-0.327007	-0.534646	0
6676	P	492478	4.58268e+06	0.610074	0.0684762	1.36491	1.02158	1.02158	-3.39726	0.0367275	-0.101423	-0.624671	1.11022e-15
6678	P	488660	4.58263e+06	0.772163	-1.38732	1.44589	0.995307	0.828253	-1.38732	0.254907	-0.288709	-1.23317	-1.77636e-15
6680	P	484941	4.58265e+06	1.09682	-0.364702	0.973583	0.733911	0.526271	-1.34553	-0.141558	-0.739395	-0.739395	3.55271e-15
6683	P	482045	4.58346e+06	0.823412	-0.366172	1.1219	0.71644	0.77896	-0.520323	-0.702645	-0.638106	-1.21347	0
6689	P	486900	4.58076e+06	0.697701	0.321223	1.09661	0.167073	0.0980799	-1.15468	-0.749218	-0.461536	-0.0152488	1.18482e-15
6691	P	490415	4.58061e+06	0.68751	-0.153273	1.52637	1.3304	1.26654	-1.45256	0.393271	-1.04709	-2.55117	0
6694	P	494168	4.58105e+06	0.57281	0.665592	1.18649	0.839439	0.987492	-2.60524	0.0573445	0.208167	-1.9121	0
6726	P	487325	4.57893e+06	0.844387	-0.370058	0.828638	0.617329	0.655795	-0.916601	-0.136443	-0.606446	-0.916601	2.77556e-15
6735	P	490961	4.57689e+06	0.919968	-1.39915	1.3838	0.546763	0.740919	-0.625957	0.0279695	-0.0128524	-1.58147	0
6764	P	493209	4.57513e+06	0.953122	-0.508396	1.36341	1.28336	0.480216	-2.58784	-0.14549	-0.390613	-0.447771	-1.55431e-15
6766	P	489572	4.57533e+06	0.667562	-1.73033	0.712013	0.49429	1.27782	-0.814043	-0.226256	0.250668	-0.631721	-2.88658e-15
6770	P	485961	4.5752e+06	1.00502	-2.53594	0.975602	0.682932	1.46226	0.722153	0.103114	-0.284652	-2.13048	0
6772	P	482199	4.57566e+06	1.18536	1.73314	0.917093	0.298054	0.503906	0.480375	-0.212772	-1.64786	-3.25729	3.55271e-15
6778	P	484578	4.57361e+06	1.08962	-0.689232	0.872953	0.677644	1.06331	0.211555	-0.118687	-1.64474	-1.46242	4.21885e-15
6780	P	488504	4.57395e+06	0.49271	0.558668	0.346107	0.205028	0.515183	-0.893584	-0.458266	-0.246957	-0.518891	2.10942e-15
6781	P	490349	4.57365e+06	0.67289	-1.00675	1.07269	0.738487	0.507375	-1.79521	0.0918597	0.232938	-0.514276	-7.88258e-15
6783	P	493891	4.57383e+06	0.686864	-0.902372	1.27238	1.24939	1.47717	-3.57858	0.196241	0.405961	-0.807061	-8.88178e-16
6819	P	485410	4.57147e+06	1.4378	0.0832507	1.3711	1.07186	1.1393	-0.291443	0.0187122	-0.0502807	-4.78031	0
6822	P	480461	4.57112e+06	1.19399	0.312788	0.659064	0.915784	0.583078	-0.569602	-0.164136	-0.569602	-2.36136	0
6827	P	482110	4.56965e+06	1.11155	-1.38715	1.0552	0.733113	0.948224	0.432008	-0.406321	-1.79262	-0.694003	-1.22125e-15
6831	P	487634	4.5699e+06	0.527066	-0.463332	0.468226	0.190594	0.842919	-0.543375	0.107212	0.107212	-1.23652	-3.55271e-15
8664	A	478784	4.50817e+06	1.82377	-2.25377	1.61744	1.4839	1.21197	0.636606	0.14413	-0.307855	-4.3562	0
8671	A	480242	4.50617e+06	1.88495	-1.36024	1.41235	1.17873	1.51144	1.25472	0.0260508	-1.36024	-4.54774	0
8673	A	483710	4.50606e+06	1.35606	-0.754151	1.79138	1.49714	0.904077	0.344461	0.162139	-1.04183	-4.25927	0
8689	A	474242	4.50206e+06	1.66609	-3.0722	2.05914	1.73755	1.00931	-0.936597	0.855162	0.449697	-3.76816	0
8692	A	479477	4.50214e+06	1.83391	-1.516	0.735295	1.59752	1.15815	0.835379	0.275763	-0.599706	-4.32031	0
8792	A	485448	4.50037e+06	1.76195	0.0942455	1.2574	1.64181	0.736099	-1.51519	0.35661	-0.011115	-4.3218	0
8794	A	481888	4.50023e+06	1.80026	-3.05294	1.85027	1.77429	1.22774	0.775759	0.775759	-1.17015	-3.98099	0
8881	A	479077	4.49088e+06	1.63489	-3.01219	1.17	1.26716	2.01438	1.74409	0.610383	-0.64238	-4.78633	0
8885	A	484555	4.49093e+06	1.68267	-2.67607	2.47867	2.13162	2.00717	-2.41168	1.48015	-0.214451	-4.47807	0
8971	A	470577	4.50092e+06	2.26036	-1.226	1.20175	0.314445	1.25891	1.38896	0.160295	-0.938318	-4.42039	0
8980	A	476051	4.49445e+06	1.57318	-0.972349	1.10709	0.860233	1.55338	1.10709	0.206306	-0.972349	-4.46259	0
8985	A	473376	4.49284e+06	1.22181	-1.55078	1.25258	1.05191	1.54026	1.58471	0.395127	-1.14532	-4.35029	0
8988	A	470006	4.49097e+06	1.5949	-0.989101	0.882701	0.84348	1.73548	1.20812	0.189554	-0.989101	-4.47603	0
8989	A	471998	4.49102e+06	1.38829	-3.21621	1.58612	0.96708	1.44892	1.57322	0.407464	-1.3843	-2.77059	0
8992	A	477143	4.49089e+06	1.81362	-2.09841	1.56516	1.96204	1.68578	1.26889	0.0988182	-2.09841	-4.19749	0
8994	A	480526	4.48901e+06	1.06962	-0.703443	1.15978	1.50605	1.31884	0.59584	0.533319	-0.502772	-4.97723	0
8996	A	475397	4.48914e+06	0.932195	-2.98596	1.77195	2.36978	1.38895	1.16581	0.385652	-0.913631	-4.11475	0
9000	A	468038	4.4893e+06	2.23521	-1.64978	0.0241939	0.547442	2.20743	2.10364	-0.109337	-0.55117	-4.80763	0
9003	A	465183	4.48731e+06	2.09781	-2.46654	1.36211	1.29467	1.97612	1.87727	0.172522	-1.77339	-4.54057	0
9004	A	467065	4.4873e+06	2.94002	-2.12286	-0.35582	-0.35582	2.94002	3.2905	-0.35582	-2.44487	-3.53535	0
9034	A	464314	4.48565e+06	2.39359	-1.85491	0.978304	0.71004	2.22263	2.27223	0.0910009	-2.8612	-3.95168	0
9036	A	461477	4.48575e+06	2.80959	-2.12489	1.58869	0.966157	1.93556	2.17918	-1.02627	-2.12489	-4.20312	0
9076	A	460738	4.48165e+06	2.01425	-2.98897	0.972795	0.903802	2.14631	1.59695	0.344186	-0.482492	-4.50683	0
9079	A	455895	4.4821e+06	2.56134	-0.442691	0.901044	0.598763	1.75453	1.84309	0.330499	-3.22805	-4.31853	0
9126	A	457911	4.47752e+06	2.34431	-2.05629	1.05723	0.386057	1.34491	1.914	-0.184488	-2.05629	-2.74944	0
9129	A	452886	4.47757e+06	2.24084	-2.93434	1.71321	0.726715	1.91234	1.41986	0.343723	-0.978033	-4.44432	0
P27	N	487978	4.38226e+06	2.28711	2.30959	1.90412	1.7218	0.294685	-3.26355	0.112363	-1.09161	-4.27451	0
P26	N	489696	4.38226e+06	2.95799	3.8644	1.55517	1.09841	-0.0542674	-2.22535	-0.459732	-2.82307	-3.91355	0
P25	N	492272	4.38226e+06	2.27295	3.92902	1.37914	0.740057	0.360568	-2.57486	-2.20438	0.360568	-4.26306	0
P24	N	493131	4.38226e+06	2.5595	3.24671	1.25824	1.09316	0.863587	-2.94054	-0.490959	-0.960962	-4.62874	0
P20	N	492284	4.39446e+06	2.98553	3.93117	1.84343	1.33261	0.0516741	-2.41027	-1.55776	-2.54295	-3.63343	0
P21	N	489706	4.39003e+06	2.0293	2.85541	1.381	0.864314	0.834461	-3.03808	-0.0229897	-0.17714	-4.72628	0
P22	N	488844	4.3867e+06	1.53048	0.970868	1.92638	1.70083	1.19401	-3.54367	0.115202	0.892906	-4.78701	0
P23	N	487122	4.38337e+06	3.17624	4.82939	1.52331	1.03084	-1.69207	-1.73824	-1.36706	-2.33596	-3.42644	0
P28	N	486261	4.38227e+06	3.40756	4.49553	1.6158	0.363037	-0.330111	-1.80431	-1.85297	-2.40203	-3.49251	0
P29	N	486259	4.38116e+06	2.61857	5.06453	0.944592	0.356806	-0.15402	-1.62398	-1.67264	-2.2217	-3.31217	0
P30	N	485398	4380046	1.37954	2.46885	1.9069	2.01553	-0.59454	-3.33693	0.568611	-2.20398	-2.20398	0
P32	N	483671	4.37561e+06	-0.163587	1.16328	1.49097	1.92542	0.826811	-3.8119	0.52956	-0.330641	-1.62992	-3.10862e-15
P34	N	481944	4.37229e+06	-0.0992522	1.14044	1.24052	2.79616	1.72236	-2.87626	1.5282	-0.88771	-4.56446	0
P33	N	481093	4.37562e+06	1.62025	3.59433	1.24758	2.19562	0.452648	-2.56443	-0.106968	-2.18641	-4.25263	0
P31	N	479383	4.37895e+06	2.38774	3.85956	1.76359	1.40691	-0.251318	-2.57284	-0.251318	-2.62592	-3.7164	0
P15	N	483713	4.39559e+06	1.70682	3.42448	1.90098	1.69244	0.402768	-2.91084	0.230917	-1.84852	-4.59904	0
P16	N	482851	4.39337e+06	2.44685	3.98516	1.60945	1.18659	-0.148407	-2.14072	-0.371551	-2.73845	-3.82892	0
P17	N	481991	4.39226e+06	1.40808	3.14268	1.56223	1.22575	0.532607	-3.17723	-0.383683	-1.07683	-3.2336	0
P18	N	480270	4.39005e+06	3.04905	4.36196	2.02319	0.950558	-1.61439	-1.98956	-0.515779	-2.58728	-3.67775	0
P19	N	478548	4.38783e+06	2.95854	4.37944	2.25121	1.09376	-2.02883	-1.68802	-1.30414	-2.28574	-3.37622	0
P35	N	471631	4.37343e+06	1.86373	4.65949	1.03705	1.65609	-0.21571	-2.02233	-2.0794	-1.90422	-2.9947	0
P36	N	477623	4.36453e+06	0.627145	0.0393586	1.03261	2.89007	1.58692	-3.29895	1.42565	0.0393586	-4.34216	0
