# Supplementary material for: Interpretation of Sedimentary Processes Using Heavy Mineral Unconstrained Data
Source: Preprints.org preprint supplement (doi:10.20944/preprints201810.0280.v1), 2018-10-15
Supplement: Supplementary file 4 [file supplementary]

# Instructions (in R language) for the substitutuin of zeros of the original data matrix (mineral count)

Commnets are in *italic*

```
> load("WMARG_78_9.RData")    comment: name of the data matrix with zeros with 78 samples and 9 minerals
> library("zCompositions")
> zPatterns(data[,2:10],label=0, cell.labels=c("Zero","Non-zero"),bar.labels=TRUE)
Patterns ('+' means Zero, '-' means Non-zero)
```

Patt.ID Am Mi And To Ga Py St Zi Ap No.Unobs Patt.Freq Percent

|    |   |   |   |   |   |   |   |   |   |   |    |       |
|----|---|---|---|---|---|---|---|---|---|---|----|-------|
| 1  | - | - | - | - | - | - | - | - | - | 0 | 25 | 32.05 |
| 2  | - | - | - | - | - | - | - | - | + | 1 | 16 | 20.51 |
| 3  | - | - | - | - | + | - | - | - | + | 2 | 10 | 12.82 |
| 4  | - | + | - | - | - | - | - | - | + | 2 | 7  | 8.97  |
| 5  | - | - | - | - | + | - | - | - | - | 1 | 5  | 6.41  |
| 6  | - | - | - | - | + | - | + | + | + | 3 | 5  | 6.41  |
| 7  | - | - | - | - | + | + | + | + | + | 4 | 3  | 3.85  |
| 8  | - | - | - | - | - | - | + | + | + | 2 | 2  | 2.56  |
| 9  | - | - | - | + | + | - | + | + | + | 4 | 2  | 2.56  |
| 10 | - | + | - | - | - | - | - | - | - | 1 | 2  | 2.56  |
| 11 | - | + | - | - | - | - | + | + | + | 3 | 1  | 1.28  |

Percentage cases by component

|  | Am   | Mi    | And  | To   | Ga   | Py    | St   | Zi    | Ap    |
|--|------|-------|------|------|------|-------|------|-------|-------|
|  | 0.00 | 12.82 | 0.00 | 0.00 | 2.56 | 32.05 | 3.85 | 16.67 | 58.97 |

Overall percentage cases: 14.1>

```
> dataz <-data
> dataz[,2:10] <-cmultRepl(data[,2:10], label = 0,    comment: zero substitution
+ method = c("GBM"), output = c("prop"),
+ delta = 0.65, threshold = 0.5, correct = TRUE, t = NULL, s = NULL)
No. corrected values: 22
```

```
> dataz
```

|   | ID           | Am          | Mi         | And         | To          | Ga          | Py |
|---|--------------|-------------|------------|-------------|-------------|-------------|----|
| 1 | P 0.12310287 | 0.163575042 | 0.23271501 | 0.145025295 | 0.178752108 | 0.013490725 |    |
| 2 | P 0.13087248 | 0.082214765 | 0.25000000 | 0.229865772 | 0.166107383 | 0.001677852 |    |
| 3 | P 0.16837603 | 0.018942303 | 0.29255335 | 0.229412338 | 0.136805522 | 0.008418801 |    |
| 4 | P 0.18559557 | 0.019390582 | 0.29085873 | 0.132963989 | 0.207756233 | 0.013850416 |    |
| 5 | P 0.09696865 | 0.043326420 | 0.28265331 | 0.229011075 | 0.148547724 | 0.001429188 |    |

6 P 0.11316872 0.069958848 0.23045267 0.224279835 0.154320988 0.002057613  
7 P 0.11799223 0.001785714 0.26666245 0.202946640 0.235984465 0.002359845  
8 P 0.13636364 0.030303030 0.26363636 0.196969697 0.181818182 0.009090909  
9 P 0.26124205 0.117337531 0.34094301 0.135048856 0.011069578 0.001524030  
10 P 0.12359551 0.071910112 0.26292135 0.186516854 0.186516854 0.002247191  
11 P 0.15204678 0.017543860 0.29824561 0.190058480 0.160818713 0.017543860  
12 P 0.24555160 0.056939502 0.21708185 0.170818505 0.138790036 0.021352313  
13 P 0.18699187 0.056910569 0.25203252 0.168021680 0.178861789 0.048780488  
14 P 0.18149466 0.124555160 0.27046263 0.106761566 0.099644128 0.028469751  
15 P 0.11751152 0.050691244 0.27188940 0.223502304 0.209677419 0.013824885  
16 P 0.12224109 0.134125637 0.22580645 0.159592530 0.185059423 0.005093379  
17 P 0.20578778 0.061093248 0.20257235 0.163987138 0.170418006 0.035369775  
18 P 0.18827160 0.018518519 0.29938272 0.129629630 0.157407407 0.040123457  
19 P 0.17783505 0.041237113 0.26804124 0.247422680 0.110824742 0.005154639  
20 P 0.15658363 0.014234875 0.16370107 0.131672598 0.288256228 0.035587189  
21 P 0.17293233 0.005012531 0.16791980 0.125313283 0.273182957 0.130325815  
22 P 0.19144144 0.331081081 0.14639640 0.078828829 0.096846847 0.094594595  
23 P 0.22383721 0.037790698 0.18023256 0.148255814 0.218023256 0.093023256  
24 P 0.16176471 0.172794118 0.13970588 0.121323529 0.165441176 0.040441176  
25 P 0.16164384 0.030136986 0.24109589 0.172602740 0.136986301 0.013698630  
26 P 0.11675333 0.023827211 0.20967945 0.204914011 0.257333874 0.001639879  
27 P 0.23385322 0.060349218 0.21876592 0.162188524 0.173504002 0.041490087  
28 P 0.25454545 0.105454545 0.14909091 0.192727273 0.138181818 0.043636364  
29 P 0.22188450 0.018237082 0.20972644 0.151975684 0.188449848 0.112462006  
30 P 0.16055046 0.059633028 0.15137615 0.114678899 0.220183486 0.055045872  
31 A 0.27049063 0.004584587 0.22006017 0.192552651 0.146706782 0.082522565  
32 A 0.27987398 0.010904181 0.17446690 0.138119627 0.192640532 0.149023808  
33 A 0.19172651 0.023239577 0.29630461 0.220775982 0.122007779 0.069718731  
34 A 0.20399808 0.001785714 0.30221937 0.219109046 0.105776781 0.015110969  
35 A 0.29980892 0.010519611 0.09993631 0.236691250 0.152534361 0.110455917  
36 A 0.28629951 0.054018776 0.17286008 0.253888246 0.102635674 0.010803755  
37 A 0.22884015 0.001785714 0.24057554 0.222972455 0.129089316 0.082147747  
38 A 0.18621313 0.001785714 0.11698004 0.128916781 0.272157649 0.207699258  
39 A 0.13956919 0.001785714 0.30937837 0.218658396 0.193070711 0.002326153  
40 A 0.40475300 0.012390398 0.14042451 0.057821857 0.148684775 0.169335439  
41 A 0.24156652 0.018946393 0.15157115 0.118414959 0.236829919 0.151571148  
42 A 0.15910766 0.009944229 0.16407977 0.134247088 0.218773033 0.228717262

43 A 0.23860721 0.018008091 0.11705259 0.112550569 0.274623387 0.162072819  
44 A 0.17845172 0.001785714 0.21748803 0.117108939 0.189604948 0.214699721  
45 A 0.21633543 0.004326709 0.16874163 0.250949097 0.190375177 0.125474548  
46 A 0.15356739 0.026077481 0.16805488 0.237594827 0.197029856 0.095617430  
47 A 0.08983459 0.001785714 0.20803799 0.378250899 0.141844087 0.113475270  
48 A 0.30095178 0.006183941 0.03298102 0.055655466 0.292706525 0.263848135  
49 A 0.26364524 0.002746305 0.12633001 0.118091095 0.233435886 0.211465449  
50 A 0.28222137 0.001785714 0.01045264 0.010452643 0.282221366 0.400684655  
51 A 0.30502628 0.004357518 0.07407781 0.056647737 0.257093576 0.270166131  
52 A 0.40987818 0.002948764 0.12089932 0.064872806 0.171028306 0.218208528  
53 A 0.26587757 0.001785714 0.09383914 0.087583201 0.303413230 0.175166401  
54 A 0.41227325 0.020443302 0.07836599 0.057922689 0.183989717 0.201025802  
55 A 0.39277108 0.004819277 0.10843373 0.055421687 0.144578313 0.255421687  
56 A 0.31576576 0.001785714 0.18630180 0.069468467 0.227351346 0.138936934  
57 N 0.28073196 0.287112237 0.19140816 0.159506798 0.038281632 0.001090604  
58 N 0.25196864 0.623725645 0.06195950 0.039241017 0.012391900 0.001413342  
59 N 0.13928061 0.729640467 0.05697843 0.030071950 0.020575545 0.001092726  
60 N 0.26621791 0.529285306 0.07246168 0.061434902 0.048832870 0.001087930  
61 N 0.24045522 0.619044280 0.07674103 0.046044616 0.012790171 0.001090604  
62 N 0.21422388 0.489373811 0.11202533 0.066822127 0.064856770 0.001349376  
63 N 0.17431830 0.099610458 0.25898719 0.206691701 0.124513073 0.001090604  
64 N 0.15236997 0.795889942 0.02917723 0.017830528 0.001171171 0.001118327  
65 N 0.23691071 0.703211143 0.03948512 0.011281462 0.005640731 0.001291514  
66 N 0.07731289 0.892319574 0.01449617 0.008053426 0.004832055 0.001111062  
67 N 0.12190081 0.362316289 0.20655415 0.230257081 0.016930668 0.001090604  
68 N 0.04188975 0.157892130 0.21911561 0.338340279 0.112780093 0.001090604  
69 N 0.02620227 0.090516925 0.10004502 0.474022842 0.161977655 0.001630418  
70 N 0.08931905 0.643097180 0.06153090 0.158789427 0.027788150 0.001360066  
71 N 0.15560319 0.677985345 0.08335885 0.058351198 0.011114514 0.001090604  
72 N 0.10739176 0.598325517 0.13040428 0.105857591 0.029149192 0.001060585  
73 N 0.15325389 0.713659905 0.06633377 0.043460058 0.011436857 0.001559747  
74 N 0.10691556 0.605854843 0.12473482 0.089096300 0.044548150 0.001090604  
75 N 0.19058160 0.708388225 0.06832171 0.023373216 0.001797940 0.001235501  
76 N 0.17163592 0.710717769 0.08460926 0.026591481 0.001171171 0.001646759  
77 N 0.05313277 0.870049169 0.02324559 0.043170379 0.006641597 0.001090604  
78 N 0.05530293 0.030723851 0.08295440 0.531522620 0.144402099 0.001090604

St Zi Ap

1 0.067453626 0.0472175379 0.0286677909  
2 0.093959732 0.0285234899 0.0167785235  
3 0.113653819 0.0315705052 0.0002673357  
4 0.072022161 0.0415512465 0.0360110803  
5 0.059831722 0.1217266072 0.0165053027  
6 0.100823045 0.0987654321 0.0061728395  
7 0.103833164 0.0424772036 0.0259582911  
8 0.100000000 0.0484848485 0.0333333333  
9 0.068631386 0.0354226508 0.0287809038  
10 0.069662921 0.0606741573 0.0359550562  
11 0.090643275 0.0526315789 0.0204678363  
12 0.071174377 0.0391459075 0.0391459075  
13 0.040650407 0.0433604336 0.0243902439  
14 0.042704626 0.0569395018 0.0889679715  
15 0.087557604 0.0207373272 0.0046082949  
16 0.073005093 0.0848896435 0.0101867572  
17 0.077170418 0.0482315113 0.0353697749  
18 0.077160494 0.0740740741 0.0154320988  
19 0.059278351 0.0463917526 0.0438144330  
20 0.064056940 0.1032028470 0.0427046263  
21 0.070175439 0.0476190476 0.0075187970  
22 0.047297297 0.0112612613 0.0022522523  
23 0.066860465 0.0145348837 0.0174418605  
24 0.062500000 0.0772058824 0.0588235294  
25 0.090410959 0.1041095890 0.0493150685  
26 0.071481632 0.0881606790 0.0262099316  
27 0.056577392 0.0528055659 0.0004660749  
28 0.065454545 0.0436363636 0.0072727273  
29 0.048632219 0.0121580547 0.0364741641  
30 0.105504587 0.1055045872 0.0275229358  
31 0.050430456 0.0320921085 0.0005600488  
32 0.043616724 0.0109041810 0.0004500706  
33 0.058098943 0.0174296828 0.0006981883  
34 0.090665812 0.0604438747 0.0008903524  
35 0.063117667 0.0262990278 0.0006369429  
36 0.070224409 0.0486168982 0.0006526476  
37 0.082147747 0.0117353924 0.0007059341

38 0.066845738 0.0190987824 0.0003029078  
39 0.113981504 0.0209353783 0.0002945861  
40 0.049561592 0.0165205306 0.0005078990  
41 0.061575779 0.0189463935 0.0005777430  
42 0.069609601 0.0149163432 0.0006050081  
43 0.058526296 0.0180080910 0.0005509514  
44 0.066919393 0.0111532322 0.0027883081  
45 0.038940377 0.0043267086 0.0005303209  
46 0.089822434 0.0318724767 0.0003632298  
47 0.052009499 0.0141844087 0.0005775401  
48 0.028858390 0.0185518220 0.0002629249  
49 0.038448263 0.0054926091 0.0003451491  
50 0.010452643 0.0012940842 0.0004348848  
51 0.030502628 0.0015929902 0.0005353339  
52 0.008846292 0.0029487639 0.0003690398  
53 0.050047543 0.0218958001 0.0003913941  
54 0.044293821 0.0012614931 0.0004239323  
55 0.031325301 0.0048192771 0.0024096386  
56 0.047364864 0.0126306303 0.0003944901  
57 0.031901360 0.0095704079 0.0003968389  
58 0.008261267 0.0007774290 0.0002612597  
59 0.001582734 0.0205755446 0.0002019929  
60 0.012602031 0.0078762694 0.0002011064  
61 0.002558034 0.0009550885 0.0003209632  
62 0.027514993 0.0235842801 0.0002494353  
63 0.042334445 0.0921396741 0.0003145498  
64 0.001620957 0.0006151519 0.0002067255  
65 0.001230171 0.0007104154 0.0002387394  
66 0.001058291 0.0006111556 0.0002053825  
67 0.054178137 0.0033861335 0.0033861335  
68 0.083779498 0.0354451721 0.0096668651  
69 0.133393363 0.0119101217 0.0003013867  
70 0.015878943 0.0019848678 0.0002514114  
71 0.011114514 0.0010342209 0.0003475561  
72 0.024546688 0.0030683360 0.0001960517  
73 0.009149486 0.0008579607 0.0002883229  
74 0.017819260 0.0089096300 0.0010308318

```
75 0.005393819 0.0006796047 0.0002283852
76 0.002417407 0.0009058232 0.0003044073
77 0.001030111 0.0012273280 0.0004124510
78 0.122895404 0.0307238509 0.0003842420    comment: new data matrix without zeros
```

```
> write.table(dataz, file="WMARG_78_9.txt")    comment: saving the new data matrix in txt format
```

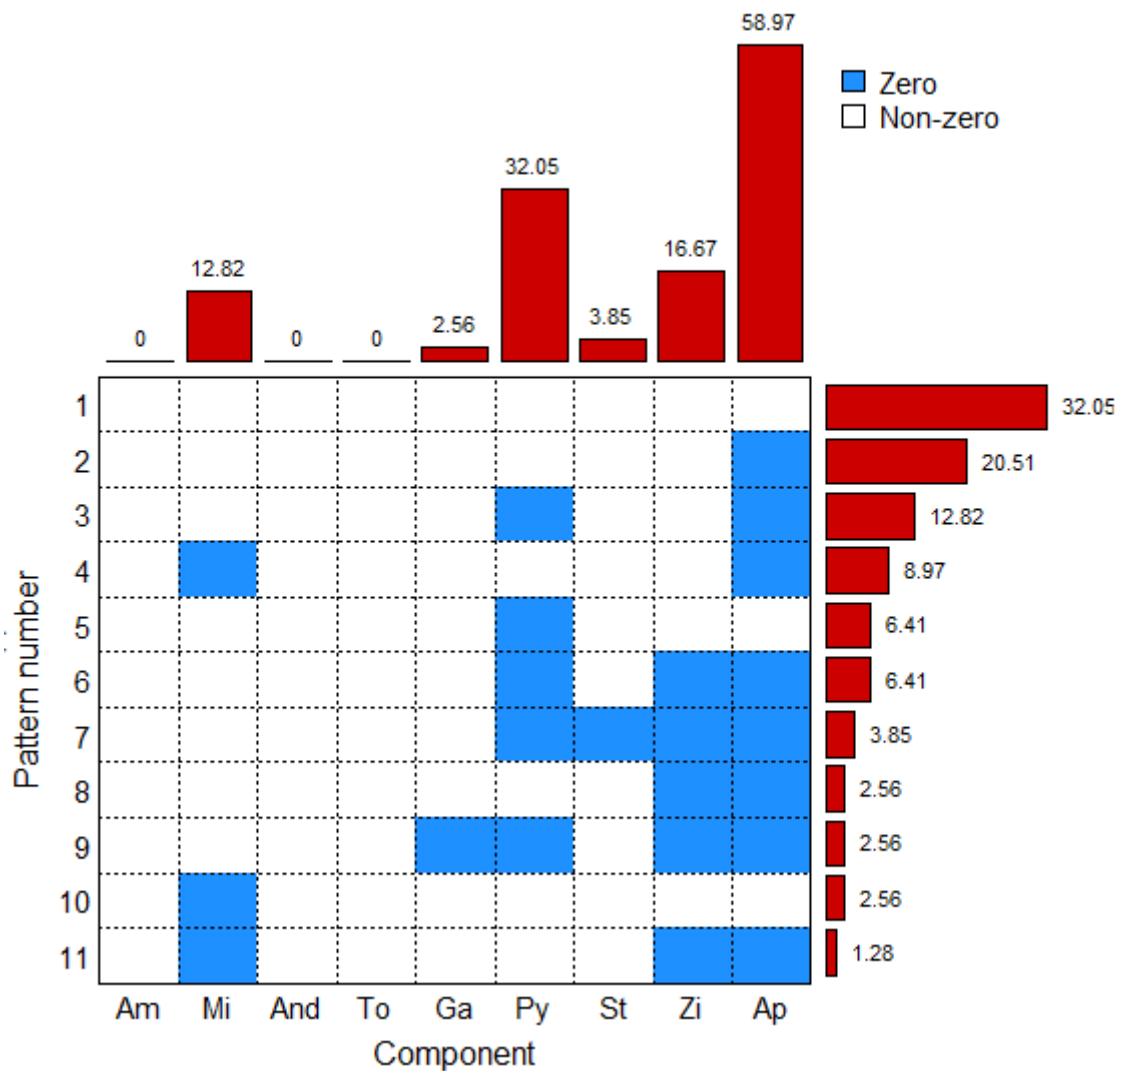

Comment (caption of the figure represented above): graphical representation of the zero-distribution pattern. Amphiboles (Am), andalusite (And) and tourmaline (To) have no zeros, that is, they are always present (bar chart on top of this figure). The other minerals always present zeros in at least one of the studied samples. Most of the samples have only one zero (32.05 %) or two zeros (20.51 %) – see bar chart on the right of this figure.
