# Supplementary material for: Interpretation of Sedimentary Processes Using Heavy Mineral Unconstrained Data
Source: Preprints.org preprint supplement (doi:10.20944/preprints201810.0280.v1), 2018-10-15
Supplement: Supplementary file 5 [file supplementary]

|             |          | UTM coordinates |       | transparent heavy minerals (count values) |     |     |     |     |    |    |    |    |    |    |    |    |    |    |     |    |    |     |       |       |       | transparent heavy minerals (percentages) |       |       |       |       |      |      |      |      |      |      |      |      |      |        |        |  |  |  |  |  |  |
|-------------|----------|-----------------|-------|-------------------------------------------|-----|-----|-----|-----|----|----|----|----|----|----|----|----|----|----|-----|----|----|-----|-------|-------|-------|------------------------------------------|-------|-------|-------|-------|------|------|------|------|------|------|------|------|------|--------|--------|--|--|--|--|--|--|
| Original ID | Paper ID | X               | Y     | Am                                        | Mi  | And | To  | Ga  | Py | St | Zi | Ap | Ru | Ol | Ky | Mo | Ep | Sp | Ana | Si | Br | sum | Am    | Mi    | And   | To                                       | Ga    | Py    | St    | Zi    | Ap   | Ru   | Ol   | Ky   | Mo   | Ep   | Sp   | Ana  | Si   | Br     | sum    |  |  |  |  |  |  |
| 6562        | P        | #####           | ##### | 73                                        | 97  | 138 | 86  | 106 | 8  | 40 | 28 | 17 | 5  | 0  | 6  | 0  | 3  | 0  | 0   | 0  | 0  | 607 | 12.03 | 15.98 | 22.73 | 14.17                                    | 17.46 | 1.32  | 6.59  | 4.61  | 2.80 | 0.82 | 0.00 | 0.99 | 0.00 | 0.49 | 0.00 | 0.00 | 0.00 | 0.00   | 100.00 |  |  |  |  |  |  |
| 6564        | P        | #####           | ##### | 78                                        | 49  | 149 | 137 | 99  | 1  | 56 | 17 | 10 | 1  | 1  | 13 | 0  | 7  | 2  | 0   | 0  | 1  | 621 | 12.56 | 7.89  | 23.99 | 22.06                                    | 15.94 | 0.16  | 9.02  | 2.74  | 1.61 | 0.16 | 0.16 | 2.09 | 0.00 | 1.13 | 0.32 | 0.00 | 0.16 | 0.00   | 100.00 |  |  |  |  |  |  |
| 6566        | P        | #####           | ##### | 80                                        | 9   | 139 | 109 | 65  | 4  | 54 | 15 | 0  | 4  | 3  | 8  | 7  | 2  | 1  | 1   | 2  | 0  | 503 | 15.90 | 1.79  | 27.63 | 21.67                                    | 12.92 | 0.80  | 10.74 | 2.98  | 0.00 | 0.80 | 0.60 | 1.59 | 1.39 | 0.40 | 0.20 | 0.20 | 0.40 | 0.00   | 100.00 |  |  |  |  |  |  |
| 6609        | P        | #####           | ##### | 67                                        | 7   | 105 | 48  | 75  | 5  | 26 | 15 | 13 | 3  | 4  | 5  | 0  | 4  | 4  | 0   | 0  | 3  | 384 | 17.45 | 1.82  | 27.34 | 12.50                                    | 19.53 | 1.30  | 6.77  | 3.91  | 3.39 | 0.78 | 1.04 | 1.30 | 0.00 | 1.04 | 1.04 | 0.00 | 0.00 | 0.78   | 100.00 |  |  |  |  |  |  |
| 6611        | P        | #####           | ##### | 47                                        | 21  | 137 | 111 | 72  | 0  | 29 | 59 | 8  | 7  | 0  | 8  | 11 | 4  | 0  | 0   | 0  | 1  | 515 | 9.13  | 4.08  | 26.60 | 21.55                                    | 13.98 | 0.00  | 5.63  | 11.46 | 1.55 | 1.36 | 0.00 | 1.55 | 2.14 | 0.78 | 0.00 | 0.00 | 0.00 | 0.19   | 100.00 |  |  |  |  |  |  |
| 6613        | P        | #####           | ##### | 55                                        | 34  | 112 | 109 | 75  | 1  | 49 | 48 | 3  | 4  | 1  | 9  | 10 | 2  | 0  | 0   | 3  | 1  | 516 | 10.66 | 6.59  | 21.71 | 21.12                                    | 14.53 | 0.19  | 9.50  | 9.30  | 0.58 | 0.78 | 0.19 | 1.74 | 1.94 | 0.39 | 0.00 | 0.58 | 0.19 | 100.00 |        |  |  |  |  |  |  |
| 6638        | P        | #####           | ##### | 50                                        | 0   | 113 | 86  | 100 | 1  | 44 | 18 | 11 | 5  | 0  | 10 | 0  | 2  | 3  | 0   | 2  | 1  | 446 | 11.21 | 0.00  | 25.34 | 19.28                                    | 22.42 | 0.22  | 9.87  | 4.04  | 2.47 | 1.12 | 0.00 | 2.24 | 0.00 | 0.45 | 0.67 | 0.00 | 0.45 | 0.22   | 100.00 |  |  |  |  |  |  |
| 6640        | P        | #####           | ##### | 45                                        | 10  | 87  | 65  | 60  | 3  | 33 | 16 | 11 | 10 | 0  | 5  | 0  | 0  | 3  | 0   | 1  | 0  | 349 | 12.89 | 2.87  | 24.93 | 18.62                                    | 17.19 | 0.86  | 9.46  | 4.58  | 3.15 | 2.87 | 0.00 | 1.43 | 0.00 | 0.86 | 0.00 | 0.29 | 0.00 | 100.00 |        |  |  |  |  |  |  |
| 6643        | P        | #####           | ##### | 118                                       | 53  | 154 | 61  | 5   | 0  | 31 | 16 | 13 | 7  | 0  | 2  | 10 | 0  | 0  | 2   | 1  | 0  | 473 | 24.95 | 11.21 | 32.56 | 12.90                                    | 1.06  | 0.00  | 6.55  | 3.38  | 2.75 | 1.48 | 0.00 | 0.42 | 2.11 | 0.00 | 0.00 | 0.42 | 2.11 | 0.00   | 100.00 |  |  |  |  |  |  |
| 6676        | P        | #####           | ##### | 55                                        | 32  | 117 | 83  | 83  | 1  | 31 | 27 | 16 | 1  | 0  | 5  | 0  | 2  | 2  | 4   | 1  | 0  | 460 | 11.96 | 6.96  | 25.43 | 18.04                                    | 18.04 | 0.22  | 6.74  | 5.87  | 3.48 | 0.22 | 0.00 | 1.09 | 0.00 | 0.43 | 0.43 | 0.87 | 0.22 | 0.00   | 100.00 |  |  |  |  |  |  |
| 6678        | P        | #####           | ##### | 52                                        | 6   | 102 | 65  | 55  | 6  | 31 | 18 | 7  | 9  | 1  | 4  | 1  | 3  | 2  | 1   | 2  | 1  | 366 | 14.21 | 1.64  | 27.87 | 17.76                                    | 15.03 | 1.64  | 8.47  | 4.92  | 1.91 | 2.46 | 0.27 | 1.09 | 0.27 | 0.82 | 0.55 | 0.27 | 0.55 | 0.27   | 100.00 |  |  |  |  |  |  |
| 6680        | P        | #####           | ##### | 69                                        | 16  | 61  | 48  | 39  | 6  | 20 | 11 | 11 | 2  | 1  | 3  | 2  | 1  | 1  | 3   | 2  | 0  | 296 | 23.31 | 5.41  | 20.61 | 16.22                                    | 13.18 | 2.03  | 6.76  | 3.72  | 3.72 | 0.68 | 0.34 | 1.01 | 0.68 | 0.34 | 0.34 | 1.01 | 0.68 | 0.00   | 100.00 |  |  |  |  |  |  |
| 6683        | P        | #####           | ##### | 69                                        | 21  | 93  | 62  | 66  | 18 | 15 | 16 | 9  | 2  | 1  | 3  | 0  | 2  | 6  | 2   | 1  | 1  | 387 | 17.83 | 5.43  | 24.03 | 16.02                                    | 17.05 | 4.65  | 3.88  | 4.13  | 2.33 | 0.52 | 0.26 | 0.78 | 0.00 | 0.52 | 1.55 | 0.52 | 0.26 | 0.26   | 100.00 |  |  |  |  |  |  |
| 6689        | P        | #####           | ##### | 51                                        | 35  | 76  | 30  | 28  | 8  | 12 | 16 | 25 | 2  | 0  | 0  | 0  | 1  | 7  | 5   | 0  | 0  | 296 | 17.23 | 11.82 | 25.68 | 10.14                                    | 9.46  | 2.70  | 4.05  | 5.41  | 8.45 | 0.68 | 0.00 | 0.00 | 0.00 | 0.34 | 2.36 | 1.69 | 0.00 | 0.00   | 100.00 |  |  |  |  |  |  |
| 6691        | P        | #####           | ##### | 51                                        | 22  | 118 | 97  | 91  | 6  | 38 | 9  | 2  | 0  | 1  | 3  | 5  | 4  | 7  | 0   | 7  | 0  | 461 | 11.06 | 4.77  | 25.60 | 21.04                                    | 19.74 | 1.30  | 8.24  | 1.95  | 0.43 | 0.00 | 0.22 | 0.65 | 1.08 | 0.87 | 1.52 | 0.00 | 1.52 | 0.00   | 100.00 |  |  |  |  |  |  |
| 6694        | P        | #####           | ##### | 62                                        | 79  | 133 | 94  | 109 | 3  | 43 | 50 | 6  | 4  | 0  | 9  | 0  | 1  | 11 | 2   | 1  | 0  | 607 | 10.21 | 13.01 | 21.91 | 15.49                                    | 17.96 | 0.49  | 7.08  | 8.24  | 0.99 | 0.66 | 0.00 | 1.48 | 0.00 | 0.16 | 1.81 | 0.33 | 0.16 | 0.00   | 100.00 |  |  |  |  |  |  |
| 6726        | P        | #####           | ##### | 64                                        | 19  | 63  | 52  | 53  | 11 | 24 | 15 | 11 | 8  | 4  | 2  | 2  | 0  | 1  | 1   | 1  | 0  | 331 | 19.34 | 5.74  | 19.03 | 15.71                                    | 16.01 | 3.32  | 7.25  | 4.53  | 3.32 | 2.42 | 1.21 | 0.60 | 0.60 | 0.00 | 0.30 | 0.30 | 0.30 | 0.00   | 100.00 |  |  |  |  |  |  |
| 6735        | P        | #####           | ##### | 61                                        | 6   | 97  | 42  | 51  | 13 | 25 | 24 | 5  | 2  | 4  | 7  | 0  | 1  | 4  | 0   | 2  | 0  | 344 | 17.73 | 1.74  | 28.20 | 12.21                                    | 14.83 | 3.78  | 7.27  | 6.98  | 1.45 | 0.58 | 1.16 | 2.03 | 0.00 | 0.29 | 1.16 | 0.00 | 0.58 | 0.00   | 100.00 |  |  |  |  |  |  |
| 6764        | P        | #####           | ##### | 69                                        | 16  | 104 | 96  | 43  | 2  | 23 | 18 | 17 | 3  | 0  | 7  | 0  | 2  | 1  | 0   | 1  | 0  | 402 | 17.16 | 3.98  | 25.87 | 23.88                                    | 10.70 | 0.50  | 5.72  | 4.48  | 4.23 | 0.75 | 0.00 | 1.74 | 0.00 | 0.50 | 0.25 | 0.00 | 0.25 | 0.00   | 100.00 |  |  |  |  |  |  |
| 6766        | P        | #####           | ##### | 42                                        | 4   | 46  | 37  | 81  | 11 | 18 | 29 | 12 | 7  | 6  | 2  | 8  | 1  | 0  | 0   | 1  | 0  | 305 | 13.77 | 1.31  | 15.08 | 12.13                                    | 26.56 | 3.61  | 5.90  | 9.51  | 3.93 | 2.30 | 1.97 | 0.66 | 2.62 | 0.33 | 0.00 | 0.33 | 0.00 | 100.00 |        |  |  |  |  |  |  |
| 6770        | P        | #####           | ##### | 69                                        | 2   | 67  | 50  | 119 | 52 | 28 | 19 | 3  | 7  | 14 | 1  | 0  | 6  | 4  | 2   | 0  | 1  | 444 | 15.54 | 0.45  | 15.09 | 11.26                                    | 26.80 | 11.71 | 6.31  | 4.28  | 0.68 | 1.58 | 3.15 | 0.23 | 0.00 | 1.35 | 0.90 | 0.45 | 0.00 | 0.23   | 100.00 |  |  |  |  |  |  |
| 6772        | P        | #####           | ##### | 85                                        | 147 | 65  | 35  | 43  | 42 | 21 | 5  | 1  | 1  | 2  | 1  | 1  | 5  | 0  | 0   | 1  | 1  | 456 | 18.64 | 32.24 | 14.25 | 7.68                                     | 9.43  | 9.21  | 4.61  | 1.10  | 0.22 | 0.22 | 0.44 | 0.22 | 0.22 | 1.10 | 0.00 | 0.00 | 0.22 | 0.22   | 100.00 |  |  |  |  |  |  |
| 6778        | P        | #####           | ##### | 76                                        | 13  | 261 | 51  | 75  | 32 | 23 | 5  | 6  | 7  | 16 | 7  | 4  | 1  | 2  | 0   | 1  | 2  | 582 | 13.06 | 2.23  | 44.85 | 8.76                                     | 12.89 | 5.50  | 3.95  | 0.86  | 1.03 | 1.20 | 2.75 | 1.20 | 0.69 | 0.17 | 0.34 | 0.00 | 0.17 | 0.34   | 100.00 |  |  |  |  |  |  |
| 6780        | P        | #####           | ##### | 42                                        | 47  | 38  | 33  | 45  | 9  | 17 | 21 | 16 | 7  | 0  | 2  | 8  | 0  | 0  | 0   | 1  | 1  | 287 | 14.63 | 16.38 | 13.24 | 11.50                                    | 15.68 | 3.14  | 5.92  | 7.32  | 5.57 | 2.44 | 0.00 | 0.70 | 2.79 | 0.00 | 0.00 | 0.00 | 0.35 | 0.35   | 100.00 |  |  |  |  |  |  |
| 6781        | P        | #####           | ##### | 59                                        | 11  | 88  | 63  | 50  | 5  | 33 | 38 | 18 | 16 | 2  | 3  | 15 | 0  | 0  | 0   | 1  | 0  | 402 | 14.68 | 2.74  | 21.89 | 15.67                                    | 12.44 | 1.24  | 8.21  | 9.45  | 4.48 | 3.98 | 0.50 | 0.75 | 3.73 | 0.00 | 0.00 | 0.00 | 0.25 | 0.00   | 100.00 |  |  |  |  |  |  |
| 6783        | P        | #####           | ##### | 49                                        | 10  | 88  | 86  | 108 | 0  | 30 | 37 | 11 | 4  | 0  | 6  | 2  | 4  | 4  | 1   | 1  | 0  | 441 | 11.11 | 2.27  | 19.95 | 19.50                                    | 24.49 | 0.00  | 6.80  | 8.39  | 2.49 | 0.91 | 0.00 | 1.36 | 0.45 | 0.91 | 0.91 | 0.23 | 0.23 | 0.00   | 100.00 |  |  |  |  |  |  |
| 6819        | P        | #####           | ##### | 62                                        | 16  | 58  | 43  | 46  | 11 | 15 | 14 | 0  | 4  | 0  | 2  | 4  | 2  | 0  | 2   | 0  | 2  | 281 | 22.06 | 5.69  | 20.64 | 15.30                                    | 16.37 | 3.91  | 5.34  | 4.98  | 0.00 | 1.42 | 0.00 | 0.71 | 1.42 | 0.71 | 0.00 | 0.71 | 0.00 | 0.71   | 100.00 |  |  |  |  |  |  |
| 6822        | P        | #####           | ##### | 70                                        | 29  | 41  | 53  | 38  | 12 | 18 | 12 | 2  | 6  | 2  | 1  | 1  | 3  | 4  | 1   | 2  | 0  | 295 | 23.73 | 9.83  | 13.90 | 17.97                                    | 12.88 | 4.07  | 6.10  | 4.07  | 0.68 | 2.03 | 0.68 | 0.34 | 1.34 | 1.02 | 1.36 | 0.34 | 0.68 | 0.00   | 100.00 |  |  |  |  |  |  |
| 6827        | P        | #####           | ##### |                                           |     |     |     |     |    |    |    |    |    |    |    |    |    |    |     |    |    |     |       |       |       |                                          |       |       |       |       |      |      |      |      |      |      |      |      |      |        |        |  |  |  |  |  |  |
