# Supplementary material for: Interpretation of Sedimentary Processes Using Heavy Mineral Unconstrained Data
Source: Preprints.org preprint supplement (doi:10.20944/preprints201810.0280.v1), 2018-10-15
Supplement: Supplementary file 5 [file Table S5_sediment texture.xlsx]

## Sheet: Folha1
SEDIMENT TEXTURE
		UTM coordinates		grain size classes in f units
Original ID	Paper ID	X	Y	-4.25	-3.75	-3.25	-2.75	-2.25	-1.75	-1.25	-0.75	-0.25	0.25	0.75	1.25	1.75	2.25	2.75	3.25	3.75	4.25	4.75	5.25	5.75	6.25	6.75	7.25	7.75	8.25	8.75	9.25	9.75	10.25	10.75	11.25	11.75
6562	P	490355	4.59351e+06	0	0	0	0	0	0.0180028	0.0210593	0.0420906	0.0777036	0.151481	3.68181	16.3969	31.2031	30.3831	14.761	2.15022	0	0	0	0	0	0.0181426	0.238185	0.301886	0.260311	0.194261	0.100718	0	0	0	0	0	0
6564	P	486670	4.59365e+06	0	0	0	0.0127798	0.0467317	0.0194886	0.0421912	0.0374211	0.0407372	0.0532619	0.313615	6.01676	22.1105	31.4375	19.692	4.33285	0.0560375	0.595092	2.50292	2.80783	2.1155	1.54343	1.2985	1.15118	0.991093	0.836284	0.691933	0.53682	0.376288	0.243747	0.0975049	0	0
6566	P	482638	4.59361e+06	0	0	0	0	0	0.00742522	0.0359448	0.0883713	0.242613	4.97037	21.4819	21.0821	21.7076	14.7321	6.45419	1.77524	0.654877	0.820644	0.879853	0.741033	0.653201	0.65035	0.636146	0.578658	0.507942	0.438912	0.361426	0.273455	0.190274	0.035379	0	0	0
6609	P	484716	4.58823e+06	0	2.22352	0.763432	1.15352	1.2652	1.61702	2.45011	4.74582	12.0466	22.1408	20.9422	3.67542	2.8687	1.9243	1.51693	1.43617	1.41889	1.53819	1.82557	2.11312	2.21716	2.08758	1.79281	1.46679	1.20444	1.00796	0.828562	0.633239	0.436245	0.28409	0.190799	0.127849	0.0568905
6611	P	488620	4.58842e+06	0	0	0	0.0390806	0.054561	0.10588	0.206064	0.248883	0.21763	0.323715	0.556455	3.26271	16.2088	28.3619	24.7786	10.4698	1.39782	0.309843	2.06798	2.84998	2.18433	1.35683	0.980558	0.876695	0.795019	0.683421	0.568391	0.452707	0.33186	0.221993	0.0885678	0	0
6613	P	492068	4.58825e+06	0	0	0	0.0966714	0.0329535	0.151896	0.3333	0.656064	0.92912	1.6651	5.51071	8.33528	15.8955	19.3359	14.9567	7.06316	2.52192	2.6242	3.97953	4.05322	3.03929	2.03722	1.48813	1.23542	1.06337	0.89461	0.723605	0.551753	0.390364	0.26407	0.169045	0.00183914	0
6638	P	489861	4.58635e+06	0	0	0	0	0	0.00246705	0.0584802	0.395704	0.619199	0.979006	4.43558	8.80816	18.8542	24.2576	18.7296	7.81652	1.13494	0.602064	2.03651	2.40142	1.82348	1.30638	1.12747	1.06737	0.965832	0.818139	0.653891	0.485246	0.328432	0.208914	0.0834448	0	0
6640	P	486240	4.58623e+06	0	1.19075	2.43702	3.42402	3.98869	3.87413	4.80249	4.45938	4.18793	4.85067	7.29896	5.10231	6.90114	8.12813	8.47373	7.29375	5.06264	3.26845	2.54629	2.35532	2.1003	1.70254	1.32488	1.07524	0.941783	0.852411	0.742528	0.588323	0.414304	0.273448	0.184958	0.125776	0.0277185
6643	P	482174	4.58634e+06	0	0	0	0.231875	0.557361	1.70767	1.77125	1.9511	1.02428	0.453324	0.178836	0.293453	1.06743	2.20946	3.57212	4.97875	6.3023	7.42422	8.18139	8.65066	8.87652	8.60762	7.63187	6.2525	4.96427	3.95719	3.11555	2.30234	1.53948	0.971772	0.633877	0.415533	0.175979
6676	P	492478	4.58268e+06	0	0	0	0	0	0.0269082	0.0117946	0.0210998	0.0191439	0.0490748	1.46938	10.7029	27.534	30.4737	14.9116	2.26763	0	0.916092	2.53169	2.43712	1.6036	1.06354	0.87837	0.773084	0.646227	0.529822	0.435579	0.341412	0.240625	0.11617	0	0	0
6678	P	488660	4.58263e+06	0	0	1.91993	5.40283	2.87292	3.84616	2.9877	1.07692	1.06907	3.10445	7.8969	6.40128	10.6505	12.7314	10.706	6.31538	3.02543	2.13177	2.44121	2.60896	2.36603	2.00463	1.70501	1.48169	1.30576	1.14134	0.951754	0.724267	0.49101	0.311929	0.204203	0.12349	0
6680	P	484941	4.58265e+06	0	0	0	0	0.0509901	0.884763	1.68784	1.58284	1.4558	4.26054	9.66791	6.86685	9.75201	12.6974	14.1513	11.9462	7.0736	3.08238	1.67322	1.7584	1.88987	1.69222	1.41077	1.24412	1.1768	1.10572	0.963091	0.747431	0.510663	0.325201	0.212908	0.129134	0
6683	P	482045	4.58346e+06	0	3.14275	1.71241	0.246332	0.810755	0.945949	1.32852	2.61566	3.6838	6.96483	13.9772	7.47394	7.15055	5.78609	4.74402	4.06652	3.41258	2.93765	2.87504	3.15087	3.47465	3.56782	3.31564	2.85591	2.4015	2.03513	1.69932	1.32034	0.919367	0.600137	0.401123	0.266449	0.117177
6689	P	486900	4.58076e+06	0	0	0	0	0	0	0.0296248	0.0658138	0.254612	3.72775	14.4205	14.568	17.8363	17.0924	13.0269	7.53445	3.08663	1.05326	0.788184	0.953045	0.932848	0.804147	0.720909	0.691196	0.659615	0.591069	0.481831	0.349246	0.225553	0.10606	0	0	0
6691	P	490415	4.58061e+06	0	0	0	0	0	0.00996135	0.0207009	0.0256297	0.0353836	0.126073	0.787975	7.88651	27.2297	34.8254	17.2228	2.17023	0	0.307457	1.68194	1.78799	1.16796	0.811966	0.788176	0.785932	0.688447	0.558487	0.446056	0.344324	0.245139	0.0457237	0	0	0
6694	P	494168	4.58105e+06	0	1.61946	3.9744	4.13262	2.62531	2.93753	3.59283	2.93716	1.97763	2.14731	7.94815	15.0127	20.6171	16.1895	6.76182	0.948052	0	0.505513	1.04626	0.946894	0.717956	0.637273	0.617488	0.557868	0.467673	0.380934	0.301233	0.22201	0.149943	0.0273964	0	0	0
6726	P	487325	4.57893e+06	0	0	0.558416	0.126408	0.0823588	0.206647	0.18395	0.362161	0.705867	3.00251	10.3342	12.1319	16.997	18.6719	15.6892	9.19661	3.23835	0.661269	0.663245	1.11556	1.1097	0.882864	0.748432	0.723157	0.705063	0.637691	0.521816	0.380858	0.247356	0.115443	0	0	0
6735	P	490961	4.57689e+06	0	0	0	0	0	0.0417967	0.0706926	0.160713	0.208746	2.07791	13.4249	21.3233	25.811	18.1047	6.72989	0.869616	0.386601	1.333	1.57154	1.25768	1.03593	1.0088	0.983348	0.885684	0.766601	0.654365	0.529976	0.388007	0.255452	0.119714	0	0	0
6764	P	493209	4.57513e+06	0	0	0	0	0	0.00979335	0.0134881	0.0640574	0.0820415	0.173654	0.734404	6.03215	21.1661	30.8881	20.8535	5.44203	0.171106	0.728854	2.57167	2.7377	1.85437	1.20944	1.03402	0.994925	0.896433	0.751291	0.602079	0.454672	0.312829	0.203549	0.0177068	0	0
6766	P	489572	4.57533e+06	0	0	1.10776	0.662679	0.398314	0.346503	0.461987	0.724428	1.38375	9.03406	25.2181	15.0698	13.5707	9.0477	5.29077	3.14027	1.94612	1.39554	1.3199	1.41167	1.42853	1.32159	1.14859	0.989465	0.878763	0.787664	0.66851	0.509662	0.349076	0.232516	0.153946	0.00171627	0
6770	P	485961	4.5752e+06	0	1.11137	0	0.366298	0.614236	0.561771	1.0997	2.06258	2.81856	7.00738	18.6438	17.4921	18.5598	12.7918	5.62046	1.5737	0.698857	0.946838	1.05086	0.944513	0.87056	0.860494	0.824991	0.749333	0.675634	0.610954	0.523885	0.400868	0.271844	0.174905	0.0720163	0	0
6772	P	482199	4.57566e+06	0	0	0	0	0.0429997	0.100648	0.0641839	0.116686	0.135377	0.163538	0.721855	1.32316	3.72124	8.54935	13.9528	15.6303	12.088	6.91881	3.96951	3.63098	4.19364	4.39319	4.04242	3.49858	3.039	2.66937	2.26736	1.76062	1.21434	0.782256	0.516898	0.342094	0.150797
6778	P	484578	4.57361e+06	0	0	0	0.505672	0.83141	1.18139	3.52484	4.49304	4.4857	9.83185	17.8481	9.59471	10.1509	8.91851	7.36889	5.65279	3.65323	2.02592	1.27874	1.1586	1.17394	1.10692	0.980215	0.870685	0.800412	0.73457	0.630773	0.482376	0.329852	0.221514	0.149055	0.0153947	0
6780	P	488504	4.57395e+06	0	0	0	0	0.0418718	0.0619567	0.248076	0.393527	0.43608	3.82012	16.5824	16.9253	17.7131	13.218	7.79042	4.25154	2.6778	2.17689	2.01607	1.86656	1.68233	1.49611	1.31547	1.15831	1.03699	0.922354	0.771011	0.577577	0.388731	0.257096	0.172265	0.00193613	0
6781	P	490349	4.57365e+06	0	0	0.68063	0.717545	0.52319	0.308556	0.4492	0.482952	0.643565	2.17178	7.32162	6.24943	8.20244	8.71331	8.0411	6.67333	5.50523	5.30068	5.69021	5.81523	5.36361	4.57295	3.72594	3.00051	2.45716	2.04767	1.6802	1.29522	0.912405	0.615299	0.426695	0.287548	0.124791
6783	P	493891	4.57383e+06	0	0	0	0.0890842	0	0.0432982	0.0963519	0.137861	0.161928	0.266218	0.528068	3.69694	19.0018	32.7445	24.2644	6.66204	0.193192	0.194503	2.09459	2.67868	1.83449	1.0687	0.831151	0.79726	0.716339	0.590734	0.474552	0.370594	0.267141	0.179786	0.0157462	0	0
6819	P	485410	4.57147e+06	0	0	0	0	0.0564927	0.592225	1.39169	2.66388	3.3104	5.02712	11.0009	10.1229	12.9879	13.0727	11.0367	7.88004	4.74257	2.68191	1.85734	1.6705	1.57778	1.42733	1.26215	1.1407	1.06594	0.986623	0.847867	0.644875	0.435954	0.287924	0.190727	0.0368038	0
6822	P	480461	4.57112e+06	0	0	0	0	0	0.0371005	0.0810714	0.152455	0.265452	3.32538	13.0188	14.3979	16.2953	15.3783	13.3327	9.89003	5.3814	1.89106	0.566961	0.596131	0.802808	0.793081	0.696927	0.648245	0.63575	0.596142	0.500857	0.367608	0.237601	0.110824	0	0	0
6827	P	482110	4.56965e+06	0	0	0	0	0.0891721	0.180583	0.553794	0.838913	1.15159	5.50121	15.1179	12.8341	14.9763	14.8615	13.1269	9.48161	4.85665	1.52046	0.395717	0.494974	0.667395	0.609602	0.497744	0.459934	0.466371	0.447846	0.37866	0.27691	0.181033	0.0330702	0	0	0
6831	P	487634	4.5699e+06	5.11812	0	0.576067	0.306061	0.314517	0.355455	0.915883	1.15475	1.69059	4.75537	13.2765	9.43635	10.3342	8.73578	6.7558	5.44644	4.65806	4.19213	3.88458	3.5201	3.00909	2.441	1.93788	1.57784	1.35407	1.18902	1.00367	0.771625	0.528291	0.340716	0.228541	0.156683	0.0348038
8664	A	478784	4.50817e+06	0	0	0	0	0	0.229848	1.13543	0.859341	0.85064	3.56512	11.3054	11.6757	15.0715	15.6586	13.6212	9.77152	5.52935	2.42579	1.00184	0.70708	0.77721	0.835957	0.829199	0.803908	0.782893	0.74307	0.64921	0.498366	0.337586	0.221678	0.112471	0.000193153	0
8671	A	480242	4.50617e+06	0	0	0	0	0.0397714	0.542495	1.61911	2.54984	3.23111	7.62859	13.4682	10.8421	13.5093	13.3687	11.0929	7.78988	4.48415	2.07463	0.911762	0.648	0.718236	0.789535	0.784507	0.745192	0.713216	0.67952	0.604916	0.474263	0.326842	0.216959	0.144518	0.00162041	0
8673	A	483710	4.50606e+06	0	0	0	0	0.151742	0.405911	1.54723	2.53571	1.87647	5.36483	13.5147	11.593	14.3727	13.5746	10.4508	6.95011	4.16313	2.35169	1.40786	1.08233	1.08067	1.15695	1.17015	1.11162	1.02627	0.923728	0.777938	0.583754	0.390507	0.257919	0.175763	0.00199674	0
8689	A	474242	4.50206e+06	0	0	0	0	0	0	0.0818162	0.451232	2.24379	12.1549	26.8787	12.816	13.052	10.4064	7.25712	4.87204	3.06586	1.60978	0.687479	0.365227	0.394804	0.492327	0.531771	0.524587	0.508261	0.482675	0.423904	0.326001	0.218546	0.142076	0.0126803	0	0
8692	A	479477	4.50214e+06	0	0	0	0	0	0	0.0527536	0.0589506	0.22182	3.4892	14.3393	15.3291	17.9459	16.0946	11.9555	7.73559	4.30043	1.93727	0.751984	0.457541	0.540057	0.645377	0.672398	0.659617	0.647699	0.624374	0.553292	0.427636	0.289987	0.189225	0.0803842	0	0
8792	A	485448	4.50037e+06	0	0	0	0	0	0.161977	0.32376	0.460951	1.02741	4.14743	11.4451	7.91095	9.66223	9.34869	7.75738	5.98937	4.6053	3.75987	3.40617	3.43228	3.64838	3.7882	3.64972	3.29903	2.92421	2.58239	2.18907	1.68288	1.13835	0.716343	0.470471	0.321456	0.150599
8794	A	481888	4.50023e+06	0	0	0.374965	0.489036	0.638727	0.752102	0.906571	1.81488	2.15907	3.64162	7.81788	8.75047	13.0637	14.8774	13.2587	9.38442	5.35704	2.62616	1.40242	1.14202	1.25812	1.42232	1.49875	1.4787	1.40097	1.27733	1.08934	0.833901	0.560405	0.350476	0.229302	0.143141	0
8881	A	479077	4.49088e+06	0	0	0	0	0	0.0499517	0.126138	0.424226	0.668185	4.31073	16.0947	14.7684	16.532	14.797	11.5404	7.72244	4.01178	1.5117	0.604312	0.614316	0.775533	0.821777	0.792356	0.756938	0.729237	0.684137	0.59293	0.455614	0.313222	0.210485	0.0914506	0	0
8885	A	484555	4.49093e+06	0	0	0	0	0	0	0.0157089	0.561516	0.162124	0.079462	0.176622	5.65084	27.7893	40.6387	21.1009	2.58403	0	0	0	0	0	0	0.15975	0.324795	0.303488	0.22584	0.172654	0.0543204	0	0	0	0	0
8971	A	470577	4.50092e+06	0	0.455644	0.21363	0.255554	0.918209	0.478411	0.430771	1.80994	3.88397	8.95488	18.9635	12.4592	12.074	8.42316	4.91897	3.24952	2.70184	2.19708	1.56582	1.20611	1.30825	1.65598	1.90847	1.94192	1.83983	1.6872	1.47178	1.15425	0.783556	0.484107	0.307144	0.20352	0.0937332
8980	A	476051	4.49445e+06	0	0	0	0.379721	0.372334	0.666251	3.13835	4.12905	10.0209	15.359	20.7843	9.95327	8.9541	6.29808	4.51757	3.878	3.19249	2.03491	0.985595	0.52275	0.51801	0.616292	0.628723	0.575931	0.529918	0.503196	0.457749	0.369137	0.263835	0.185111	0.12857	0.0368905	0
8985	A	473376	4.49284e+06	0	0	0	0.139271	0.102893	0.344325	1.39554	2.34571	4.80978	14.1166	28.8762	14.9229	12.2486	7.16622	3.78464	2.53188	1.86324	1.07338	0.455215	0.253825	0.321851	0.424596	0.462981	0.458066	0.446335	0.426059	0.375571	0.293831	0.207266	0.140809	0.0124159	0	0
8988	A	470006	4.49097e+06	0	0	0	0	0.0453559	1.18935	3.31098	4.55719	9.21835	20.139	24.7034	12.0915	10.1399	5.79812	2.56977	1.30093	0.934067	0.635233	0.339062	0.204638	0.232821	0.311289	0.356916	0.364635	0.358343	0.341893	0.30216	0.238472	0.170255	0.113696	0.0327748	0	0
8989	A	471998	4.49102e+06	0	0	0	0.62732	0.129485	0.349993	0.0196845	0.108125	0.37967	5.73893	14.5129	19.5318	17.8905	12.742	8.59605	6.15525	4.09119	2.13806	0.895112	0.514097	0.579946	0.69083	0.712904	0.687222	0.66565	0.640859	0.573269	0.449908	0.310292	0.204752	0.0642336	0	0
8992	A	477143	4.49089e+06	0	0	0	0	0	0.0124326	0.0795987	0.421925	1.71321	7.6451	16.3212	13.5157	15.529	14.1932	11.2746	7.7926	4.24725	1.62086	0.497182	0.402198	0.556762	0.609924	0.580381	0.554678	0.5495	0.531591	0.470569	0.367728	0.258028	0.177123	0.0776286	0	0
8994	A	480526	4.48901e+06	0	0	0	0	0	0	0.064033	0.112316	0.522194	4.06452	11.8202	11.4433	13.6165	14.5773	14.3188	11.5354	6.67655	2.49143	0.712562	0.654586	0.943452	1.0008	0.91303	0.851488	0.837659	0.805451	0.704353	0.540759	0.370742	0.250128	0.170472	0.00192676	0
8996	A	475397	4.48914e+06	0	0	0	0	0	0.0526937	0.395228	2.48543	5.13167	9.69644	14.1955	8.83941	10.5568	11.5398	11.9072	10.1756	6.20798	2.35432	0.520981	0.370694	0.653429	0.741475	0.675968	0.628066	0.631122	0.624034	0.555983	0.429883	0.294415	0.198402	0.135964	0.00154195	0
9000	A	468038	4.4893e+06	0	0	0.597545	0.483821	1.40578	2.2133	3.98495	4.82375	4.3942	9.91291	22.2523	12.0511	12.1886	9.05808	5.31888	2.80042	1.6096	1.0645	0.710261	0.496668	0.456759	0.518775	0.570185	0.5744	0.557155	0.531701	0.477695	0.380886	0.267857	0.179306	0.117327	0.00129883	0
9003	A	465183	4.48731e+06	0	0	0	0.504301	0.490991	0.86072	1.40926	2.10186	2.67083	7.84487	20.6608	12.8339	12.3713	8.74322	5.32038	3.79409	3.3283	2.69194	1.79257	1.20515	1.16019	1.37971	1.50289	1.43896	1.304	1.18822	1.06318	0.864441	0.60971	0.392684	0.258035	0.174551	0.0388966
9004	A	467065	4.4873e+06	0	0.349881	2.02209	1.14245	1.22623	1.59265	3.72983	6.31882	7.58075	14.0542	26.2657	13.4531	11.4016	6.01531	1.75288	0.229002	0.23478	0.363958	0.256387	0.134102	0.13671	0.205185	0.251545	0.25985	0.251837	0.235316	0.204319	0.160798	0.114865	0.0558081	0	0	0
9034	A	464314	4.48565e+06	0	0	0	0	0.285514	0.423243	0.888854	1.44003	1.93997	9.46715	28.1276	18.459	16.8925	10.137	4.15027	1.61617	1.16197	0.943333	0.529288	0.248252	0.240524	0.353139	0.426438	0.437671	0.428268	0.410756	0.366545	0.29052	0.204695	0.124614	0.00670766	0	0
9036	A	461477	4.48575e+06	0	0	0	0.415189	0.016015	0.366393	1.64179	3.54622	4.35605	9.99996	21.8129	15.5378	15.659	11.0333	5.74375	2.57173	1.39337	0.956508	0.601827	0.357951	0.326304	0.421489	0.500686	0.518389	0.505625	0.481407	0.430142	0.342326	0.241874	0.158663	0.0632856	0	0
9076	A	460738	4.48165e+06	0	0	0	0.307269	0	0.0928426	0.296237	0.308488	0.753045	6.82139	21.1138	16.9819	17.133	12.4868	7.49973	4.59088	3.09367	1.90399	0.933171	0.471364	0.460451	0.596338	0.667122	0.659227	0.635037	0.611055	0.552479	0.439003	0.305412	0.201441	0.0848507	0	0
9079	A	455895	4.4821e+06	0	0	0	0	0.0934284	0.10491	0.6757	1.63705	1.84226	3.11753	8.45386	11.0209	15.088	15.0046	11.8904	8.46818	5.81819	3.63649	1.92421	1.03926	0.935194	1.15776	1.30559	1.29471	1.2228	1.14666	1.02877	0.822954	0.56448	0.349823	0.221537	0.13464	0
9126	A	457911	4.47752e+06	0	0	0	0	0	0.00377069	0.080537	0.336042	0.531134	2.76949	13.1936	9.79166	12.7019	12.05	10.6037	10.0472	8.74417	5.69355	2.51115	0.931177	0.847518	1.19529	1.31331	1.21158	1.10584	1.06619	1.01101	0.852328	0.61107	0.392754	0.252745	0.151268	0
9129	A	452886	4.47757e+06	0	0	0	0	0	0.019924	0.0419029	0.108599	0.21903	1.15722	7.61969	13.4559	17.9937	17.2717	13.5892	9.83585	6.53908	3.57151	1.48795	0.655448	0.653363	0.835922	0.884986	0.824924	0.759407	0.70895	0.628748	0.492692	0.336724	0.217177	0.0904535	0	0
P27	N	487978	4.38226e+06	0	0	0	0	0	0	0	0	0.106465	0.132204	0.315886	0.0840473	0.32028	0.629169	1.50668	2.99029	4.88901	7.17634	9.68302	11.9846	13.2616	12.7118	10.4126	7.51138	5.15691	3.66074	2.68725	1.88925	1.20861	0.754656	0.513774	0.342639	0.0707624
P26	N	489696	4.38226e+06	0	0	0	0	0	0	0	0.30833	0.559929	0.503255	0.445332	0.466487	1.24536	2.76682	4.93824	7.37921	9.58195	11.2333	11.8765	11.2841	9.70946	7.65506	5.62196	4.01289	2.95212	2.28218	1.76606	1.2811	0.851469	0.559383	0.395132	0.269667	0.0547303
P25	N	492272	4.38226e+06	0	0	0	0	0	0	0	0	0.00815903	0.0780936	1.94665	6.6531	11.6868	12.9529	10.3458	7.50406	6.77398	7.34419	7.47331	6.66129	5.41991	4.20256	3.12617	2.25385	1.64382	1.2547	0.967394	0.698659	0.455156	0.287593	0.194617	0.0672783	0
P24	N	493131	4.38226e+06	0	0	0	0	0	0	0	0	0	0.0145889	0.108572	1.79531	12.1656	26.7683	31.0074	19.9879	6.23045	0.373147	0	0.418415	0.75729	0.373072	0	0	0	0	0	0	0	0	0	0	0
P20	N	492284	4.39446e+06	0	0	0	0	0	0	0	0	0	0.0144129	0.413378	1.99193	3.78544	4.70818	5.09617	6.27054	8.75121	11.6104	13.077	12.2247	9.67975	6.78429	4.49224	3.05439	2.25021	1.75476	1.35304	0.980824	0.664238	0.451968	0.326725	0.220731	0.0434503
P21	N	489706	4.39003e+06	0	0	0	0	0	0	0	0	0	0.0390132	0.115755	3.20809	16.5334	30.6116	29.5476	15.098	3.12674	0.0145138	0.0682037	0.72574	0.679553	0.231804	0	0	0	0	0	0	0	0	0	0	0
P22	N	488844	4.3867e+06	0	0	0	0	0	0	0	0	0.0293245	0.0617127	0.122301	2.54093	20.5336	40.5477	29.3027	6.76173	0.0998926	0	0	0	0	0	0	0	0	0	0	0	0	0	0	0	0
P23	N	487122	4.38337e+06	0	0	0	0	0	0	0	0.0369168	0.0490388	0.0584057	0.142557	1.57263	7.55393	16.5041	22.0342	19.3287	11.3452	4.8238	2.54842	2.61468	2.68283	2.20872	1.6275	1.24565	1.02891	0.852245	0.659555	0.465942	0.311477	0.214095	0.0905643	0	0
P28	N	486261	4.38227e+06	0	0	0	0	0	0	0	0.0824747	0.0467767	0.067933	0.468806	0.575954	0.908487	2.18562	4.97048	8.21883	10.1582	10.5081	10.2045	9.89758	9.3586	8.18408	6.4839	4.82801	3.62368	2.8318	2.20128	1.59314	1.05118	0.683432	0.477838	0.321621	0.0677059
P29	N	486259	4.38116e+06	0	0	0	0	0	0.129307	0.168213	0	0	0	0.149789	0.11796	0.273797	0.607825	1.44628	2.9416	5.22994	8.38775	11.6927	13.8628	13.9407	11.9769	8.95918	6.1548	4.24214	3.11451	2.33911	1.65272	1.0628	0.677886	0.476656	0.326084	0.0684977
P30	N	485398	4380046	0	0	0	0	4.99997	11.4088	12.6611	17.4813	13.5652	5.3604	1.53942	0.165672	0.474664	1.39119	2.8476	4.00066	4.08714	3.37556	2.67245	2.40014	2.36809	2.22077	1.84997	1.41196	1.06732	0.832826	0.64199	0.4564	0.293511	0.186992	0.130969	0.0897526	0.018122
P32	N	483671	4.37561e+06	0	0	0	0	0	0	0	0.00138292	0.07099	0.0636144	0.29364	1.20508	12.3529	31.0185	34.5072	17.6086	2.87635	0.00172755	0	0	0	0	0	0	0	0	0	0	0	0	0	0	0
P34	N	481944	4.37229e+06	0	0	0	0	0	0	0.0737101	0.811954	3.67945	19.6306	54.2977	18.2267	3.27077	0.0091264	0	0	0	0	0	0	0	0	0	0	0	0	0	0	0	0	0	0	0
P33	N	481093	4.37562e+06	0	0	0	0	0	0.0611581	0.234332	0.166736	0.26974	0.272958	0.833903	1.87495	5.18183	9.28063	11.5974	10.7651	8.27645	6.51682	6.19636	6.51699	6.56666	6.00977	4.99278	3.90191	3.01998	2.36523	1.81078	1.28394	0.827068	0.524209	0.360723	0.242892	0.0486771
P31	N	479383	4.37895e+06	0	0	0	0	0	0	0	0.0925277	0.191109	0.157516	0.410787	0.284153	0.159968	0.967098	4.00429	8.89851	12.9758	14.0213	12.2838	9.76511	7.87733	6.58442	5.36196	4.14956	3.18782	2.53622	2.02385	1.51234	1.02832	0.68101	0.473372	0.308982	0.0628298
P15	N	483713	4.39559e+06	0	0	0	0	0	0	0.272934	0.498582	0.813616	1.84808	4.36769	6.94109	12.6908	16.978	16.2751	11.2023	5.91703	3.21619	2.63725	2.64794	2.52686	2.27453	1.98542	1.69993	1.44072	1.2039	0.958597	0.694541	0.448812	0.276208	0.181732	0.00214505	0
P16	N	482851	4.39337e+06	0	0	0	0	0	0	0	0	0	0	0.147907	0.51277	0.647956	1.31945	3.4785	6.86069	9.85451	11.213	11.0154	10.2572	9.48786	8.4619	6.9507	5.31149	4.02447	3.16871	2.49965	1.83415	1.21297	0.778723	0.534305	0.354087	0.073633
P17	N	481991	4.39226e+06	0	0	0	0	0	0	0	0	0	0	0.002026	0.10709	0.19935	0.317129	0.672569	1.42544	2.96496	5.80222	9.5726	12.8739	14.1549	12.9674	10.2718	7.59844	5.78044	4.65384	3.69795	2.67765	1.72961	1.08832	0.746086	0.503955	0.192366
P18	N	480270	4.39005e+06	0	0	0	0	0	0	0	0.619737	1.45108	1.47117	1.64759	0.104859	0.607518	2.15732	4.94611	7.70209	8.88517	8.58775	8.1381	8.42937	8.97053	8.72521	7.38658	5.62384	4.18421	3.23037	2.50416	1.80545	1.1723	0.741007	0.505177	0.334245	0.0690665
P19	N	478548	4.38783e+06	0	0	0	0	0	0	0	0.22078	0.383997	0.375748	0.625855	0.436841	0.562131	0.948034	1.85413	3.26342	5.053	7.23794	9.5191	11.3114	11.9909	11.244	9.35096	7.15013	5.35968	4.11462	3.14971	2.25231	1.45709	0.919579	0.629753	0.423595	0.165403
P35	N	471631	4.37343e+06	0	0	0	0	0	0	0	0	0.0579089	0.0196672	0.18156	0.199473	0.224338	0.786535	2.68959	5.72626	8.6169	10.4131	11.0527	11.0232	10.5332	9.39423	7.61672	5.74617	4.32732	3.41764	2.71984	2.01348	1.33942	0.860027	0.584513	0.379249	0.0769023
P36	N	477623	4.36453e+06	0	0	0	0	0	2.02792	14.3752	21.5871	20.8302	26.7976	14.1057	0.125741	0.0803052	0.0406183	0.0192966	0.00810601	0.00224288	3.23809e-05	0	0	0	0	0	0	0	0	0	0	0	0	0	0	0

## Sheet: CURVAS
	Id	-4.25	-3.75	-3.25	-2.75	-2.25	-1.75	-1.25	-0.75	-0.25	0.25	0.75	1.25	1.75	2.25	2.75	3.25	3.75	4.25	4.75	5.25	5.75	6.25	6.75	7.25	7.75	8.25	8.75	9.25	9.75	10.25	10.75	11.25	11.75												Id	moda_f	freq_%	curva
6562	P1	0	0	0	0	0	0.0180028	0.0210593	0.0420906	0.0777036	0.151481	3.68181	16.3969	31.2031	30.3831	14.761	2.15022	0	0	0	0	0	0.0181426	0.238185	0.301886	0.260311	0.194261	0.100718	0	0	0	0	0	0												P1	1.75	31.2	uni
6564	P2	0	0	0	0.0127798	0.0467317	0.0194886	0.0421912	0.0374211	0.0407372	0.0532619	0.313615	6.01676	22.1105	31.4375	19.692	4.33285	0.0560375	0.595092	2.50292	2.80783	2.1155	1.54343	1.2985	1.15118	0.991093	0.836284	0.691933	0.53682	0.376288	0.243747	0.0975049	0	0												P2	2.25	31.44	uni
6566	P3	0	0	0	0	0	0.00742522	0.0359448	0.0883713	0.242613	4.97037	21.4819	21.0821	21.7076	14.7321	6.45419	1.77524	0.654877	0.820644	0.879853	0.741033	0.653201	0.65035	0.636146	0.578658	0.507942	0.438912	0.361426	0.273455	0.190274	0.035379	0	0	0												P3	1.75	21.7076	poli
6609	P4	0	2.22352	0.763432	1.15352	1.2652	1.61702	2.45011	4.74582	12.0466	22.1408	20.9422	3.67542	2.8687	1.9243	1.51693	1.43617	1.41889	1.53819	1.82557	2.11312	2.21716	2.08758	1.79281	1.46679	1.20444	1.00796	0.828562	0.633239	0.436245	0.28409	0.190799	0.127849	0.0568905												P4	0.25	22.1408	poli
6611	P5	0	0	0	0.0390806	0.054561	0.10588	0.206064	0.248883	0.21763	0.323715	0.556455	3.26271	16.2088	28.3619	24.7786	10.4698	1.39782	0.309843	2.06798	2.84998	2.18433	1.35683	0.980558	0.876695	0.795019	0.683421	0.568391	0.452707	0.33186	0.221993	0.0885678	0	0												P5
6613	P6	0	0	0	0.0966714	0.0329535	0.151896	0.3333	0.656064	0.92912	1.6651	5.51071	8.33528	15.8955	19.3359	14.9567	7.06316	2.52192	2.6242	3.97953	4.05322	3.03929	2.03722	1.48813	1.23542	1.06337	0.89461	0.723605	0.551753	0.390364	0.26407	0.169045	0.00183914	0												P6
6638	P7	0	0	0	0	0	0.00246705	0.0584802	0.395704	0.619199	0.979006	4.43558	8.80816	18.8542	24.2576	18.7296	7.81652	1.13494	0.602064	2.03651	2.40142	1.82348	1.30638	1.12747	1.06737	0.965832	0.818139	0.653891	0.485246	0.328432	0.208914	0.0834448	0	0												P7
6640	P8	0	1.19075	2.43702	3.42402	3.98869	3.87413	4.80249	4.45938	4.18793	4.85067	7.29896	5.10231	6.90114	8.12813	8.47373	7.29375	5.06264	3.26845	2.54629	2.35532	2.1003	1.70254	1.32488	1.07524	0.941783	0.852411	0.742528	0.588323	0.414304	0.273448	0.184958	0.125776	0.0277185												P8
6643	P9	0	0	0	0.231875	0.557361	1.70767	1.77125	1.9511	1.02428	0.453324	0.178836	0.293453	1.06743	2.20946	3.57212	4.97875	6.3023	7.42422	8.18139	8.65066	8.87652	8.60762	7.63187	6.2525	4.96427	3.95719	3.11555	2.30234	1.53948	0.971772	0.633877	0.415533	0.175979												P9
6676	P10	0	0	0	0	0	0.0269082	0.0117946	0.0210998	0.0191439	0.0490748	1.46938	10.7029	27.534	30.4737	14.9116	2.26763	0	0.916092	2.53169	2.43712	1.6036	1.06354	0.87837	0.773084	0.646227	0.529822	0.435579	0.341412	0.240625	0.11617	0	0	0												P10
6678	P11	0	0	1.91993	5.40283	2.87292	3.84616	2.9877	1.07692	1.06907	3.10445	7.8969	6.40128	10.6505	12.7314	10.706	6.31538	3.02543	2.13177	2.44121	2.60896	2.36603	2.00463	1.70501	1.48169	1.30576	1.14134	0.951754	0.724267	0.49101	0.311929	0.204203	0.12349	0												P11			quadrimodal
6680	P12	0	0	0	0	0.0509901	0.884763	1.68784	1.58284	1.4558	4.26054	9.66791	6.86685	9.75201	12.6974	14.1513	11.9462	7.0736	3.08238	1.67322	1.7584	1.88987	1.69222	1.41077	1.24412	1.1768	1.10572	0.963091	0.747431	0.510663	0.325201	0.212908	0.129134	0												P12
6683	P13	0	3.14275	1.71241	0.246332	0.810755	0.945949	1.32852	2.61566	3.6838	6.96483	13.9772	7.47394	7.15055	5.78609	4.74402	4.06652	3.41258	2.93765	2.87504	3.15087	3.47465	3.56782	3.31564	2.85591	2.4015	2.03513	1.69932	1.32034	0.919367	0.600137	0.401123	0.266449	0.117177												P13
6689	P14	0	0	0	0	0	0	0.0296248	0.0658138	0.254612	3.72775	14.4205	14.568	17.8363	17.0924	13.0269	7.53445	3.08663	1.05326	0.788184	0.953045	0.932848	0.804147	0.720909	0.691196	0.659615	0.591069	0.481831	0.349246	0.225553	0.10606	0	0	0												P14
6691	P15	0	0	0	0	0	0.00996135	0.0207009	0.0256297	0.0353836	0.126073	0.787975	7.88651	27.2297	34.8254	17.2228	2.17023	0	0.307457	1.68194	1.78799	1.16796	0.811966	0.788176	0.785932	0.688447	0.558487	0.446056	0.344324	0.245139	0.0457237	0	0	0												P15
6694	P16	0	1.61946	3.9744	4.13262	2.62531	2.93753	3.59283	2.93716	1.97763	2.14731	7.94815	15.0127	20.6171	16.1895	6.76182	0.948052	0	0.505513	1.04626	0.946894	0.717956	0.637273	0.617488	0.557868	0.467673	0.380934	0.301233	0.22201	0.149943	0.0273964	0	0	0												P16
6726	P17	0	0	0.558416	0.126408	0.0823588	0.206647	0.18395	0.362161	0.705867	3.00251	10.3342	12.1319	16.997	18.6719	15.6892	9.19661	3.23835	0.661269	0.663245	1.11556	1.1097	0.882864	0.748432	0.723157	0.705063	0.637691	0.521816	0.380858	0.247356	0.115443	0	0	0												P17
6735	P18	0	0	0	0	0	0.0417967	0.0706926	0.160713	0.208746	2.07791	13.4249	21.3233	25.811	18.1047	6.72989	0.869616	0.386601	1.333	1.57154	1.25768	1.03593	1.0088	0.983348	0.885684	0.766601	0.654365	0.529976	0.388007	0.255452	0.119714	0	0	0												P18
6764	P19	0	0	0	0	0	0.00979335	0.0134881	0.0640574	0.0820415	0.173654	0.734404	6.03215	21.1661	30.8881	20.8535	5.44203	0.171106	0.728854	2.57167	2.7377	1.85437	1.20944	1.03402	0.994925	0.896433	0.751291	0.602079	0.454672	0.312829	0.203549	0.0177068	0	0												P19
6766	P20	0	0	1.10776	0.662679	0.398314	0.346503	0.461987	0.724428	1.38375	9.03406	25.2181	15.0698	13.5707	9.0477	5.29077	3.14027	1.94612	1.39554	1.3199	1.41167	1.42853	1.32159	1.14859	0.989465	0.878763	0.787664	0.66851	0.509662	0.349076	0.232516	0.153946	0.00171627	0												P20
6770	P21	0	1.11137	0	0.366298	0.614236	0.561771	1.0997	2.06258	2.81856	7.00738	18.6438	17.4921	18.5598	12.7918	5.62046	1.5737	0.698857	0.946838	1.05086	0.944513	0.87056	0.860494	0.824991	0.749333	0.675634	0.610954	0.523885	0.400868	0.271844	0.174905	0.0720163	0	0												P21
6772	P22	0	0	0	0	0.0429997	0.100648	0.0641839	0.116686	0.135377	0.163538	0.721855	1.32316	3.72124	8.54935	13.9528	15.6303	12.088	6.91881	3.96951	3.63098	4.19364	4.39319	4.04242	3.49858	3.039	2.66937	2.26736	1.76062	1.21434	0.782256	0.516898	0.342094	0.150797												P22
6778	P23	0	0	0	0.505672	0.83141	1.18139	3.52484	4.49304	4.4857	9.83185	17.8481	9.59471	10.1509	8.91851	7.36889	5.65279	3.65323	2.02592	1.27874	1.1586	1.17394	1.10692	0.980215	0.870685	0.800412	0.73457	0.630773	0.482376	0.329852	0.221514	0.149055	0.0153947	0												P23
6780	P24	0	0	0	0	0.0418718	0.0619567	0.248076	0.393527	0.43608	3.82012	16.5824	16.9253	17.7131	13.218	7.79042	4.25154	2.6778	2.17689	2.01607	1.86656	1.68233	1.49611	1.31547	1.15831	1.03699	0.922354	0.771011	0.577577	0.388731	0.257096	0.172265	0.00193613	0												P24
6781	P25	0	0	0.68063	0.717545	0.52319	0.308556	0.4492	0.482952	0.643565	2.17178	7.32162	6.24943	8.20244	8.71331	8.0411	6.67333	5.50523	5.30068	5.69021	5.81523	5.36361	4.57295	3.72594	3.00051	2.45716	2.04767	1.6802	1.29522	0.912405	0.615299	0.426695	0.287548	0.124791												P25
6783	P26	0	0	0	0.0890842	0	0.0432982	0.0963519	0.137861	0.161928	0.266218	0.528068	3.69694	19.0018	32.7445	24.2644	6.66204	0.193192	0.194503	2.09459	2.67868	1.83449	1.0687	0.831151	0.79726	0.716339	0.590734	0.474552	0.370594	0.267141	0.179786	0.0157462	0	0												P26
6819	P27	0	0	0	0	0.0564927	0.592225	1.39169	2.66388	3.3104	5.02712	11.0009	10.1229	12.9879	13.0727	11.0367	7.88004	4.74257	2.68191	1.85734	1.6705	1.57778	1.42733	1.26215	1.1407	1.06594	0.986623	0.847867	0.644875	0.435954	0.287924	0.190727	0.0368038	0												P27
6822	P28	0	0	0	0	0	0.0371005	0.0810714	0.152455	0.265452	3.32538	13.0188	14.3979	16.2953	15.3783	13.3327	9.89003	5.3814	1.89106	0.566961	0.596131	0.802808	0.793081	0.696927	0.648245	0.63575	0.596142	0.500857	0.367608	0.237601	0.110824	0	0	0												P28
6827	P29	0	0	0	0	0.0891721	0.180583	0.553794	0.838913	1.15159	5.50121	15.1179	12.8341	14.9763	14.8615	13.1269	9.48161	4.85665	1.52046	0.395717	0.494974	0.667395	0.609602	0.497744	0.459934	0.466371	0.447846	0.37866	0.27691	0.181033	0.0330702	0	0	0												P29
6831	P30	5.11812	0	0.576067	0.306061	0.314517	0.355455	0.915883	1.15475	1.69059	4.75537	13.2765	9.43635	10.3342	8.73578	6.7558	5.44644	4.65806	4.19213	3.88458	3.5201	3.00909	2.441	1.93788	1.57784	1.35407	1.18902	1.00367	0.771625	0.528291	0.340716	0.228541	0.156683	0.0348038												P30
8664	A1	0	0	0	0	0	0.229848	1.13543	0.859341	0.85064	3.56512	11.3054	11.6757	15.0715	15.6586	13.6212	9.77152	5.52935	2.42579	1.00184	0.70708	0.77721	0.835957	0.829199	0.803908	0.782893	0.74307	0.64921	0.498366	0.337586	0.221678	0.112471	0.000193153	0												A1
8671	A2	0	0	0	0	0.0397714	0.542495	1.61911	2.54984	3.23111	7.62859	13.4682	10.8421	13.5093	13.3687	11.0929	7.78988	4.48415	2.07463	0.911762	0.648	0.718236	0.789535	0.784507	0.745192	0.713216	0.67952	0.604916	0.474263	0.326842	0.216959	0.144518	0.00162041	0												A2
8673	A3	0	0	0	0	0.151742	0.405911	1.54723	2.53571	1.87647	5.36483	13.5147	11.593	14.3727	13.5746	10.4508	6.95011	4.16313	2.35169	1.40786	1.08233	1.08067	1.15695	1.17015	1.11162	1.02627	0.923728	0.777938	0.583754	0.390507	0.257919	0.175763	0.00199674	0												A3
8689	A4	0	0	0	0	0	0	0.0818162	0.451232	2.24379	12.1549	26.8787	12.816	13.052	10.4064	7.25712	4.87204	3.06586	1.60978	0.687479	0.365227	0.394804	0.492327	0.531771	0.524587	0.508261	0.482675	0.423904	0.326001	0.218546	0.142076	0.0126803	0	0												A4
8692	A5	0	0	0	0	0	0	0.0527536	0.0589506	0.22182	3.4892	14.3393	15.3291	17.9459	16.0946	11.9555	7.73559	4.30043	1.93727	0.751984	0.457541	0.540057	0.645377	0.672398	0.659617	0.647699	0.624374	0.553292	0.427636	0.289987	0.189225	0.0803842	0	0												A5
8792	A6	0	0	0	0	0	0.161977	0.32376	0.460951	1.02741	4.14743	11.4451	7.91095	9.66223	9.34869	7.75738	5.98937	4.6053	3.75987	3.40617	3.43228	3.64838	3.7882	3.64972	3.29903	2.92421	2.58239	2.18907	1.68288	1.13835	0.716343	0.470471	0.321456	0.150599												A6
8794	A7	0	0	0.374965	0.489036	0.638727	0.752102	0.906571	1.81488	2.15907	3.64162	7.81788	8.75047	13.0637	14.8774	13.2587	9.38442	5.35704	2.62616	1.40242	1.14202	1.25812	1.42232	1.49875	1.4787	1.40097	1.27733	1.08934	0.833901	0.560405	0.350476	0.229302	0.143141	0												A7
8881	A8	0	0	0	0	0	0.0499517	0.126138	0.424226	0.668185	4.31073	16.0947	14.7684	16.532	14.797	11.5404	7.72244	4.01178	1.5117	0.604312	0.614316	0.775533	0.821777	0.792356	0.756938	0.729237	0.684137	0.59293	0.455614	0.313222	0.210485	0.0914506	0	0												A8
8885	A9	0	0	0	0	0	0	0.0157089	0.561516	0.162124	0.079462	0.176622	5.65084	27.7893	40.6387	21.1009	2.58403	0	0	0	0	0	0	0.15975	0.324795	0.303488	0.22584	0.172654	0.0543204	0	0	0	0	0												A9
8971	A10	0	0.455644	0.21363	0.255554	0.918209	0.478411	0.430771	1.80994	3.88397	8.95488	18.9635	12.4592	12.074	8.42316	4.91897	3.24952	2.70184	2.19708	1.56582	1.20611	1.30825	1.65598	1.90847	1.94192	1.83983	1.6872	1.47178	1.15425	0.783556	0.484107	0.307144	0.20352	0.0937332												A10
8980	A11	0	0	0	0.379721	0.372334	0.666251	3.13835	4.12905	10.0209	15.359	20.7843	9.95327	8.9541	6.29808	4.51757	3.878	3.19249	2.03491	0.985595	0.52275	0.51801	0.616292	0.628723	0.575931	0.529918	0.503196	0.457749	0.369137	0.263835	0.185111	0.12857	0.0368905	0												A11
8985	A12	0	0	0	0.139271	0.102893	0.344325	1.39554	2.34571	4.80978	14.1166	28.8762	14.9229	12.2486	7.16622	3.78464	2.53188	1.86324	1.07338	0.455215	0.253825	0.321851	0.424596	0.462981	0.458066	0.446335	0.426059	0.375571	0.293831	0.207266	0.140809	0.0124159	0	0												A12
8988	A13	0	0	0	0	0.0453559	1.18935	3.31098	4.55719	9.21835	20.139	24.7034	12.0915	10.1399	5.79812	2.56977	1.30093	0.934067	0.635233	0.339062	0.204638	0.232821	0.311289	0.356916	0.364635	0.358343	0.341893	0.30216	0.238472	0.170255	0.113696	0.0327748	0	0												A13
8989	A14	0	0	0	0.62732	0.129485	0.349993	0.0196845	0.108125	0.37967	5.73893	14.5129	19.5318	17.8905	12.742	8.59605	6.15525	4.09119	2.13806	0.895112	0.514097	0.579946	0.69083	0.712904	0.687222	0.66565	0.640859	0.573269	0.449908	0.310292	0.204752	0.0642336	0	0												A14
8992	A15	0	0	0	0	0	0.0124326	0.0795987	0.421925	1.71321	7.6451	16.3212	13.5157	15.529	14.1932	11.2746	7.7926	4.24725	1.62086	0.497182	0.402198	0.556762	0.609924	0.580381	0.554678	0.5495	0.531591	0.470569	0.367728	0.258028	0.177123	0.0776286	0	0												A15
8994	A16	0	0	0	0	0	0	0.064033	0.112316	0.522194	4.06452	11.8202	11.4433	13.6165	14.5773	14.3188	11.5354	6.67655	2.49143	0.712562	0.654586	0.943452	1.0008	0.91303	0.851488	0.837659	0.805451	0.704353	0.540759	0.370742	0.250128	0.170472	0.00192676	0												A16
8996	A17	0	0	0	0	0	0.0526937	0.395228	2.48543	5.13167	9.69644	14.1955	8.83941	10.5568	11.5398	11.9072	10.1756	6.20798	2.35432	0.520981	0.370694	0.653429	0.741475	0.675968	0.628066	0.631122	0.624034	0.555983	0.429883	0.294415	0.198402	0.135964	0.00154195	0												A17
9000	A18	0	0	0.597545	0.483821	1.40578	2.2133	3.98495	4.82375	4.3942	9.91291	22.2523	12.0511	12.1886	9.05808	5.31888	2.80042	1.6096	1.0645	0.710261	0.496668	0.456759	0.518775	0.570185	0.5744	0.557155	0.531701	0.477695	0.380886	0.267857	0.179306	0.117327	0.00129883	0												A18
9003	A19	0	0	0	0.504301	0.490991	0.86072	1.40926	2.10186	2.67083	7.84487	20.6608	12.8339	12.3713	8.74322	5.32038	3.79409	3.3283	2.69194	1.79257	1.20515	1.16019	1.37971	1.50289	1.43896	1.304	1.18822	1.06318	0.864441	0.60971	0.392684	0.258035	0.174551	0.0388966												A19
9004	A20	0	0.349881	2.02209	1.14245	1.22623	1.59265	3.72983	6.31882	7.58075	14.0542	26.2657	13.4531	11.4016	6.01531	1.75288	0.229002	0.23478	0.363958	0.256387	0.134102	0.13671	0.205185	0.251545	0.25985	0.251837	0.235316	0.204319	0.160798	0.114865	0.0558081	0	0	0												A20
9034	A21	0	0	0	0	0.285514	0.423243	0.888854	1.44003	1.93997	9.46715	28.1276	18.459	16.8925	10.137	4.15027	1.61617	1.16197	0.943333	0.529288	0.248252	0.240524	0.353139	0.426438	0.437671	0.428268	0.410756	0.366545	0.29052	0.204695	0.124614	0.00670766	0	0												A21
9036	A22	0	0	0	0.415189	0.016015	0.366393	1.64179	3.54622	4.35605	9.99996	21.8129	15.5378	15.659	11.0333	5.74375	2.57173	1.39337	0.956508	0.601827	0.357951	0.326304	0.421489	0.500686	0.518389	0.505625	0.481407	0.430142	0.342326	0.241874	0.158663	0.0632856	0	0												A22
9076	A23	0	0	0	0.307269	0	0.0928426	0.296237	0.308488	0.753045	6.82139	21.1138	16.9819	17.133	12.4868	7.49973	4.59088	3.09367	1.90399	0.933171	0.471364	0.460451	0.596338	0.667122	0.659227	0.635037	0.611055	0.552479	0.439003	0.305412	0.201441	0.0848507	0	0												A23
9079	A24	0	0	0	0	0.0934284	0.10491	0.6757	1.63705	1.84226	3.11753	8.45386	11.0209	15.088	15.0046	11.8904	8.46818	5.81819	3.63649	1.92421	1.03926	0.935194	1.15776	1.30559	1.29471	1.2228	1.14666	1.02877	0.822954	0.56448	0.349823	0.221537	0.13464	0												A24
9126	A25	0	0	0	0	0	0.00377069	0.080537	0.336042	0.531134	2.76949	13.1936	9.79166	12.7019	12.05	10.6037	10.0472	8.74417	5.69355	2.51115	0.931177	0.847518	1.19529	1.31331	1.21158	1.10584	1.06619	1.01101	0.852328	0.61107	0.392754	0.252745	0.151268	0												A25
9129	A26	0	0	0	0	0	0.019924	0.0419029	0.108599	0.21903	1.15722	7.61969	13.4559	17.9937	17.2717	13.5892	9.83585	6.53908	3.57151	1.48795	0.655448	0.653363	0.835922	0.884986	0.824924	0.759407	0.70895	0.628748	0.492692	0.336724	0.217177	0.0904535	0	0												A26
GM2007/1155	N1	0	0	0	0	0	0	0	0	0.106465	0.132204	0.315886	0.0840473	0.32028	0.629169	1.50668	2.99029	4.88901	7.17634	9.68302	11.9846	13.2616	12.7118	10.4126	7.51138	5.15691	3.66074	2.68725	1.88925	1.20861	0.754656	0.513774	0.342639	0.0707624												N1
GM2007/1156	N2	0	0	0	0	0	0	0	0.30833	0.559929	0.503255	0.445332	0.466487	1.24536	2.76682	4.93824	7.37921	9.58195	11.2333	11.8765	11.2841	9.70946	7.65506	5.62196	4.01289	2.95212	2.28218	1.76606	1.2811	0.851469	0.559383	0.395132	0.269667	0.0547303												N2
GM2007/1157	N3	0	0	0	0	0	0	0	0	0.00815903	0.0780936	1.94665	6.6531	11.6868	12.9529	10.3458	7.50406	6.77398	7.34419	7.47331	6.66129	5.41991	4.20256	3.12617	2.25385	1.64382	1.2547	0.967394	0.698659	0.455156	0.287593	0.194617	0.0672783	0												N3
GM2007/1158	N4	0	0	0	0	0	0	0	0	0	0.0145889	0.108572	1.79531	12.1656	26.7683	31.0074	19.9879	6.23045	0.373147	0	0.418415	0.75729	0.373072	0	0	0	0	0	0	0	0	0	0	0												N4
GM2007/1159	N5	0	0	0	0	0	0	0	0	0	0.0144129	0.413378	1.99193	3.78544	4.70818	5.09617	6.27054	8.75121	11.6104	13.077	12.2247	9.67975	6.78429	4.49224	3.05439	2.25021	1.75476	1.35304	0.980824	0.664238	0.451968	0.326725	0.220731	0.0434503												N5
GM2007/1160	N6	0	0	0	0	0	0	0	0	0	0.0390132	0.115755	3.20809	16.5334	30.6116	29.5476	15.098	3.12674	0.0145138	0.0682037	0.72574	0.679553	0.231804	0	0	0	0	0	0	0	0	0	0	0												N6
GM2007/1161	N7	0	0	0	0	0	0	0	0	0.0293245	0.0617127	0.122301	2.54093	20.5336	40.5477	29.3027	6.76173	0.0998926	0	0	0	0	0	0	0	0	0	0	0	0	0	0	0	0												N7
GM2007/1162	N8	0	0	0	0	0	0	0	0.0369168	0.0490388	0.0584057	0.142557	1.57263	7.55393	16.5041	22.0342	19.3287	11.3452	4.8238	2.54842	2.61468	2.68283	2.20872	1.6275	1.24565	1.02891	0.852245	0.659555	0.465942	0.311477	0.214095	0.0905643	0	0												N8
GM2007/1163	N9	0	0	0	0	0	0	0	0.0824747	0.0467767	0.067933	0.468806	0.575954	0.908487	2.18562	4.97048	8.21883	10.1582	10.5081	10.2045	9.89758	9.3586	8.18408	6.4839	4.82801	3.62368	2.8318	2.20128	1.59314	1.05118	0.683432	0.477838	0.321621	0.0677059												N9
GM2007/1164	N10	0	0	0	0	0	0.129307	0.168213	0	0	0	0.149789	0.11796	0.273797	0.607825	1.44628	2.9416	5.22994	8.38775	11.6927	13.8628	13.9407	11.9769	8.95918	6.1548	4.24214	3.11451	2.33911	1.65272	1.0628	0.677886	0.476656	0.326084	0.0684977												N10
GM2007/1165	N11	0	0	0	0	4.99997	11.4088	12.6611	17.4813	13.5652	5.3604	1.53942	0.165672	0.474664	1.39119	2.8476	4.00066	4.08714	3.37556	2.67245	2.40014	2.36809	2.22077	1.84997	1.41196	1.06732	0.832826	0.64199	0.4564	0.293511	0.186992	0.130969	0.0897526	0.018122												N11
GM2007/1166	N12	0	0	0	0	0	0	0	0.00138292	0.07099	0.0636144	0.29364	1.20508	12.3529	31.0185	34.5072	17.6086	2.87635	0.00172755	0	0	0	0	0	0	0	0	0	0	0	0	0	0	0												N12
GM2007/1167	N13	0	0	0	0	0	0	0.0737101	0.811954	3.67945	19.6306	54.2977	18.2267	3.27077	0.0091264	0	0	0	0	0	0	0	0	0	0	0	0	0	0	0	0	0	0	0												N13
GM2007/1168	N14	0	0	0	0	0	0.0611581	0.234332	0.166736	0.26974	0.272958	0.833903	1.87495	5.18183	9.28063	11.5974	10.7651	8.27645	6.51682	6.19636	6.51699	6.56666	6.00977	4.99278	3.90191	3.01998	2.36523	1.81078	1.28394	0.827068	0.524209	0.360723	0.242892	0.0486771												N14
GM2007/1169	N15	0	0	0	0	0	0	0	0.0925277	0.191109	0.157516	0.410787	0.284153	0.159968	0.967098	4.00429	8.89851	12.9758	14.0213	12.2838	9.76511	7.87733	6.58442	5.36196	4.14956	3.18782	2.53622	2.02385	1.51234	1.02832	0.68101	0.473372	0.308982	0.0628298												N15
GM2007/1170	N16	0	0	0	0	0	0	0.272934	0.498582	0.813616	1.84808	4.36769	6.94109	12.6908	16.978	16.2751	11.2023	5.91703	3.21619	2.63725	2.64794	2.52686	2.27453	1.98542	1.69993	1.44072	1.2039	0.958597	0.694541	0.448812	0.276208	0.181732	0.00214505	0												N16
GM2007/1171	N17	0	0	0	0	0	0	0	0	0	0	0.147907	0.51277	0.647956	1.31945	3.4785	6.86069	9.85451	11.213	11.0154	10.2572	9.48786	8.4619	6.9507	5.31149	4.02447	3.16871	2.49965	1.83415	1.21297	0.778723	0.534305	0.354087	0.073633												N17
GM2007/1172	N18	0	0	0	0	0	0	0	0	0	0	0.002026	0.10709	0.19935	0.317129	0.672569	1.42544	2.96496	5.80222	9.5726	12.8739	14.1549	12.9674	10.2718	7.59844	5.78044	4.65384	3.69795	2.67765	1.72961	1.08832	0.746086	0.503955	0.192366												N18
GM2007/1173	N19	0	0	0	0	0	0	0	0.619737	1.45108	1.47117	1.64759	0.104859	0.607518	2.15732	4.94611	7.70209	8.88517	8.58775	8.1381	8.42937	8.97053	8.72521	7.38658	5.62384	4.18421	3.23037	2.50416	1.80545	1.1723	0.741007	0.505177	0.334245	0.0690665												N19
GM2007/1174	N20	0	0	0	0	0	0	0	0.22078	0.383997	0.375748	0.625855	0.436841	0.562131	0.948034	1.85413	3.26342	5.053	7.23794	9.5191	11.3114	11.9909	11.244	9.35096	7.15013	5.35968	4.11462	3.14971	2.25231	1.45709	0.919579	0.629753	0.423595	0.165403												N20
GM2007/1175	N21	0	0	0	0	0	0	0	0	0.0579089	0.0196672	0.18156	0.199473	0.224338	0.786535	2.68959	5.72626	8.6169	10.4131	11.0527	11.0232	10.5332	9.39423	7.61672	5.74617	4.32732	3.41764	2.71984	2.01348	1.33942	0.860027	0.584513	0.379249	0.0769023												N21
GM2007/1178	N22	0	0	0	0	0	2.02792	14.3752	21.5871	20.8302	26.7976	14.1057	0.125741	0.0803052	0.0406183	0.0192966	0.00810601	0.00224288	3.23809e-05	0	0	0	0	0	0	0	0	0	0	0	0	0	0	0												N22
[truncated: 6 more columns]
