# Supplementary material for: Interpretation of Sedimentary Processes Using Heavy Mineral Unconstrained Data
Source: Preprints.org preprint supplement (doi:10.20944/preprints201810.0280.v1), 2018-10-15
Supplement: Supplementary file 6 [file supplementary]

| DATA MATRIX WITHOUT ZEROS |          |                 |            |                                            |        |        |        |        |        |        |        |        |        |                                                |         |         |         |         |         |         |         |        |          |
|---------------------------|----------|-----------------|------------|--------------------------------------------|--------|--------|--------|--------|--------|--------|--------|--------|--------|------------------------------------------------|---------|---------|---------|---------|---------|---------|---------|--------|----------|
|                           |          | UTM coordinates |            | main heavy minerals (without zeros; sum=1) |        |        |        |        |        |        |        |        |        | main heavy minerals (without zeros; sum=100 %) |         |         |         |         |         |         |         |        |          |
| Original ID               | Paper ID | X               | Y          | Am                                         | Mi     | And    | To     | Ga     | Py     | St     | Zi     | Ap     | sum    | Am                                             | Mi      | And     | To      | Ga      | Py      | St      | Zi      | Ap     | sum      |
| 6562                      | P        | 490354.99       | 4593506.13 | 0.1231                                     | 0.1636 | 0.2327 | 0.1450 | 0.1788 | 0.0135 | 0.0675 | 0.0472 | 0.0287 | 1.0000 | 12.3103                                        | 16.3575 | 23.2715 | 14.5025 | 17.8752 | 1.3491  | 6.7454  | 4.7218  | 2.8668 | 100.0000 |
| 6564                      | P        | 486670.07       | 4593652.17 | 0.1309                                     | 0.0822 | 0.2500 | 0.2299 | 0.1661 | 0.0017 | 0.0940 | 0.0285 | 0.0168 | 1.0000 | 12.0872                                        | 8.2215  | 25.0000 | 22.9866 | 16.6107 | 0.1678  | 9.3960  | 2.8523  | 1.6779 | 100.0000 |
| 6566                      | P        | 482637.53       | 4593613.26 | 0.1684                                     | 0.0189 | 0.2926 | 0.2294 | 0.1368 | 0.0084 | 0.1137 | 0.0316 | 0.0003 | 1.0000 | 16.8376                                        | 1.8942  | 29.2553 | 22.9412 | 13.6806 | 0.8419  | 11.3654 | 3.1571  | 0.0267 | 100.0000 |
| 6609                      | P        | 484715.54       | 4588225.68 | 0.1856                                     | 0.0194 | 0.2909 | 0.1330 | 0.2078 | 0.0139 | 0.0720 | 0.0416 | 0.0360 | 1.0000 | 18.5596                                        | 1.9391  | 29.0859 | 13.2964 | 20.7756 | 1.3850  | 7.2022  | 4.1551  | 3.6011 | 100.0000 |
| 6611                      | P        | 488619.68       | 4588416.33 | 0.0970                                     | 0.0433 | 0.2827 | 0.2290 | 0.1485 | 0.0014 | 0.0598 | 0.1217 | 0.0165 | 1.0000 | 9.6969                                         | 4.3326  | 28.2653 | 22.9011 | 14.8548 | 0.1429  | 5.9832  | 12.1727 | 1.6505 | 100.0000 |
| 6613                      | P        | 492067.65       | 4588254.38 | 0.1132                                     | 0.0700 | 0.2305 | 0.2243 | 0.1543 | 0.0021 | 0.1008 | 0.0988 | 0.0062 | 1.0000 | 11.3169                                        | 6.9959  | 23.0453 | 22.4280 | 15.4321 | 0.2058  | 10.0823 | 9.8765  | 0.6173 | 100.0000 |
| 6638                      | P        | 489860.57       | 4586354.32 | 0.1180                                     | 0.0018 | 0.2667 | 0.2029 | 0.2360 | 0.0024 | 0.1038 | 0.0425 | 0.0260 | 1.0000 | 11.7992                                        | 0.1786  | 26.6662 | 20.2947 | 23.5984 | 0.2360  | 10.3833 | 4.2477  | 2.5958 | 100.0000 |
| 6640                      | P        | 486240.29       | 4586227.57 | 0.1364                                     | 0.0303 | 0.2636 | 0.1970 | 0.1818 | 0.0091 | 0.1000 | 0.0485 | 0.0333 | 1.0000 | 13.6364                                        | 3.0303  | 26.3636 | 19.6970 | 18.1818 | 0.9091  | 10.0000 | 4.8485  | 3.3333 | 100.0000 |
| 6643                      | P        | 482174.27       | 4586337.17 | 0.2612                                     | 0.1173 | 0.3409 | 0.1350 | 0.0111 | 0.0015 | 0.0686 | 0.0354 | 0.0288 | 1.0000 | 26.1242                                        | 11.7338 | 34.0943 | 13.5049 | 1.1070  | 0.1524  | 6.8631  | 3.5423  | 2.8781 | 100.0000 |
| 6676                      | P        | 492478.36       | 4582680.31 | 0.1236                                     | 0.0719 | 0.2629 | 0.1865 | 0.1865 | 0.0022 | 0.0697 | 0.0607 | 0.0360 | 1.0000 | 12.3596                                        | 7.1910  | 26.2921 | 18.6517 | 18.6517 | 0.2247  | 6.9663  | 6.0674  | 3.5955 | 100.0000 |
| 6678                      | P        | 488659.62       | 4582631.99 | 0.1520                                     | 0.0175 | 0.2982 | 0.1901 | 0.1608 | 0.0175 | 0.0906 | 0.0526 | 0.0205 | 1.0000 | 15.2047                                        | 1.7544  | 29.8246 | 19.0058 | 16.0819 | 1.7544  | 9.0643  | 5.2632  | 2.0468 | 100.0000 |
| 6680                      | P        | 484941.28       | 4582646.90 | 0.2456                                     | 0.0569 | 0.2171 | 0.1708 | 0.1388 | 0.0214 | 0.0712 | 0.0391 | 0.0391 | 1.0000 | 24.5552                                        | 5.6940  | 21.7082 | 17.0819 | 13.8790 | 2.1352  | 7.1174  | 3.9146  | 3.9146 | 100.0000 |
| 6683                      | P        | 482044.92       | 4583458.87 | 0.1870                                     | 0.0569 | 0.2520 | 0.1680 | 0.1789 | 0.0488 | 0.0407 | 0.0434 | 0.0244 | 1.0000 | 18.6992                                        | 5.6911  | 25.2033 | 16.8022 | 17.8862 | 4.8780  | 4.0650  | 4.3360  | 2.4390 | 100.0000 |
| 6689                      | P        | 486900.24       | 4580758.82 | 0.1815                                     | 0.1246 | 0.2705 | 0.1068 | 0.0996 | 0.0285 | 0.0427 | 0.0569 | 0.0890 | 1.0000 | 18.1495                                        | 12.4555 | 27.0463 | 10.6762 | 9.9644  | 2.8470  | 4.2705  | 5.6940  | 8.8968 | 100.0000 |
| 6691                      | P        | 490415.22       | 4580612.36 | 0.1175                                     | 0.0507 | 0.2719 | 0.2235 | 0.2097 | 0.0138 | 0.0876 | 0.0207 | 0.0046 | 1.0000 | 11.7512                                        | 5.0691  | 27.1889 | 22.3502 | 20.9677 | 1.3825  | 8.7558  | 2.0737  | 0.4608 | 100.0000 |
| 6694                      | P        | 494167.81       | 4581045.45 | 0.1222                                     | 0.1341 | 0.2258 | 0.1596 | 0.1851 | 0.0051 | 0.0730 | 0.0849 | 0.0102 | 1.0000 | 12.2241                                        | 13.4126 | 22.5806 | 15.9593 | 18.5059 | 0.5093  | 7.3005  | 8.4890  | 1.0187 | 100.0000 |
| 6726                      | P        | 487324.59       | 4578933.20 | 0.2058                                     | 0.0611 | 0.2026 | 0.1640 | 0.1704 | 0.0354 | 0.0772 | 0.0482 | 0.0354 | 1.0000 | 20.5788                                        | 6.1093  | 20.2572 | 16.3987 | 17.0418 | 3.5370  | 7.7170  | 4.8232  | 3.5370 | 100.0000 |
| 6735                      | P        | 490961.02       | 4576886.34 | 0.1883                                     | 0.0185 | 0.2994 | 0.1296 | 0.1574 | 0.0401 | 0.0772 | 0.0741 | 0.0154 | 1.0000 | 18.8272                                        | 1.8519  | 29.9383 | 12.9630 | 15.7407 | 4.0123  | 7.7160  | 7.4074  | 1.5432 | 100.0000 |
| 6764                      | P        | 493208.86       | 4575133.16 | 0.1778                                     | 0.0412 | 0.2680 | 0.2474 | 0.1108 | 0.0052 | 0.0593 | 0.0464 | 0.0438 | 1.0000 | 17.7835                                        | 4.1237  | 26.8041 | 24.7423 | 11.0825 | 0.5155  | 5.9278  | 4.6392  | 4.3814 | 100.0000 |
| 6766                      | P        | 489571.54       | 4575328.05 | 0.1566                                     | 0.0142 | 0.1637 | 0.1317 | 0.2883 | 0.0356 | 0.0641 | 0.1032 | 0.0427 | 1.0000 | 15.6584                                        | 1.4235  | 16.3701 | 13.1673 | 28.8256 | 3.5587  | 6.4057  | 10.3203 | 4.2705 | 100.0000 |
| 6770                      | P        | 485961.39       | 4575204.96 | 0.1729                                     | 0.0050 | 0.1679 | 0.1253 | 0.2732 | 0.1303 | 0.0702 | 0.0476 | 0.0075 | 1.0000 | 17.2932                                        | 0.5013  | 16.7920 | 12.5313 | 27.3183 | 13.0326 | 7.0175  | 4.7619  | 0.7519 | 100.0000 |
| 6772                      | P        | 482199.23       | 4575660.59 | 0.1914                                     | 0.3311 | 0.1464 | 0.0788 | 0.0968 | 0.0946 | 0.0473 | 0.0113 | 0.0023 | 1.0000 | 19.1441                                        | 33.1081 | 14.6396 | 7.8829  | 9.6847  | 9.4595  | 4.7297  | 1.1261  | 0.2252 | 100.0000 |
| 6778                      | P        | 484577.55       | 4573607.83 | 0.2238                                     | 0.0378 | 0.1802 | 0.1483 | 0.2180 | 0.0930 | 0.0669 | 0.0145 | 0.0174 | 1.0000 | 22.3837                                        | 3.7791  | 18.0233 | 14.8256 | 21.8023 | 9.3023  | 6.6860  | 1.4535  | 1.7442 | 100.0000 |
| 6780                      | P        | 488504.39       | 4573947.92 | 0.1618                                     | 0.1728 | 0.1397 | 0.1213 | 0.1654 | 0.0404 | 0.0625 | 0.0772 | 0.0588 | 1.0000 | 16.1765                                        | 17.2794 | 13.9706 | 12.1324 | 16.5441 | 4.0441  | 6.2500  | 7.7206  | 5.8824 | 100.0000 |
| 6781                      | P        | 490349.01       | 4573646.32 | 0.1616                                     | 0.0301 | 0.2411 | 0.1726 | 0.1370 | 0.0137 | 0.0904 | 0.1041 | 0.0493 | 1.0000 | 16.1644                                        | 3.0137  | 24.1096 | 17.2603 | 13.6986 | 1.3699  | 9.0411  | 10.4110 | 4.9315 | 100.0000 |
| 6783                      | P        | 493891.17       | 4573831.81 | 0.1168                                     | 0.0238 | 0.2097 | 0.2049 | 0.2573 | 0.0016 | 0.0715 | 0.0882 | 0.0262 | 1.0000 | 11.6753                                        | 2.3827  | 20.9679 | 20.4914 | 25.7334 | 0.1640  | 7.1482  | 8.8161  | 2.6210 | 100.0000 |
| 6819                      | P        | 485409.83       | 4571467.82 | 0.2339                                     | 0.0603 | 0.2188 | 0.1622 | 0.1735 | 0.0415 | 0.0566 | 0.0528 | 0.0005 | 1.0000 | 23.3853                                        | 6.0349  | 21.8766 | 16.2189 | 17.3504 | 4.1490  | 5.6577  | 5.2806  | 0.0466 | 100.0000 |
| 6822                      | P        | 480461.14       | 4571119.03 | 0.2545                                     | 0.1055 | 0.1491 | 0.1927 | 0.1382 | 0.0436 | 0.0655 | 0.0436 | 0.0073 | 1.0000 | 25.4545                                        | 10.5455 | 14.9091 | 19.2727 | 13.8182 | 4.3636  | 6.5455  | 4.3636  | 0.7273 | 100.0000 |
| 6827                      | P        | 482109.50       | 4569654.81 | 0.2219                                     | 0.0182 | 0.2097 | 0.1520 | 0.1884 | 0.1125 | 0.0486 | 0.0122 | 0.0365 | 1.0000 | 22.1884                                        | 1.8237  | 20.9726 | 15.1976 | 18.8450 | 11.2462 | 4.8632  | 1.2158  | 3.6474 | 100.0000 |
| 6831                      | P        | 487634.46       | 4569898.77 | 0.1606                                     | 0.0596 | 0.1514 | 0.1147 | 0.2202 | 0.0550 | 0.1055 | 0.1055 | 0.0275 | 1.0000 | 16.0550                                        | 5.9633  | 15.1376 | 11.4679 | 22.0183 | 5.5046  | 10.5505 | 10.5505 | 2.7523 | 100.0000 |
| 8664                      | A        | 478783.81       | 4508174.07 | 0.2705                                     | 0.0046 | 0.2201 | 0.1926 | 0.1467 | 0.0825 | 0.0504 | 0.0321 | 0.0006 | 1.0000 | 27.0491                                        | 0.4585  | 22.0060 | 19.2553 | 14.6707 | 8.2523  | 5.0430  | 3.2092  | 0.0560 | 100.0000 |
| 8671                      | A        | 480242.04       | 4506169.79 | 0.2799                                     | 0.0109 | 0.1745 | 0.1381 | 0.1926 | 0.1490 | 0.0436 | 0.0109 | 0.0005 | 1.0000 | 27.9874                                        | 1.0904  | 17.4467 | 13.8120 | 19.2641 | 14.9024 | 4.3617  | 1.0904  | 0.0450 | 100.0000 |
| 8673                      | A        | 483710.14       | 4506061.68 | 0.1917                                     | 0.0232 | 0.2963 | 0.2208 | 0.1220 | 0.0697 | 0.0581 | 0.0174 | 0.0007 | 1.0000 | 19.1727                                        | 2.3240  | 29.6305 | 22.0776 | 12.2008 | 6.9719  | 5.8099  | 1.7430  | 0.0698 | 100.0000 |
| 8689                      | A        | 474241.99       | 4502056.74 | 0.2040                                     | 0.0018 | 0.3022 | 0.2191 | 0.1058 | 0.0151 | 0.0907 | 0.0604 | 0.0009 | 1.0000 | 20.3998                                        | 0.1786  | 30.2219 | 21.9109 | 10.5777 | 1.5111  | 9.0666  | 6.0     |        |          |
