# Supplementary material for: Interpretation of Sedimentary Processes Using Heavy Mineral Unconstrained Data
Source: Preprints.org preprint supplement (doi:10.20944/preprints201810.0280.v1), 2018-10-15
Supplement: Supplementary file 7 [file Table S6_transparent heavy mineral suite.xlsx]

## Sheet: Folha1
TRANSPARENT HEAVY MINERALS
		UTM coordinates		transparent heavy minerals (count values)																			transparent heavy minerals (percentages)
Original ID	Paper ID	X	Y	Am	Mi	And	To	Ga	Py	St	Zi	Ap	Ru	Ol	Ky	Mo	Ep	Sp	Ana	Si	Br	sum	Am	Mi	And	To	Ga	Py	St	Zi	Ap	Ru	Ol	Ky	Mo	Ep	Sp	Ana	Si	Br	sum
6562	P	490355	4.59351e+06	73	97	138	86	106	8	40	28	17	5	0	6	0	3	0	0	0	0	607	12.0264	15.9802	22.7348	14.168	17.4629	1.31796	6.58979	4.61285	2.80066	0.823723	0	0.988468	0	0.494234	0	0	0	0	100
6564	P	486670	4.59365e+06	78	49	149	137	99	1	56	17	10	1	1	13	0	7	2	0	1	0	621	12.5604	7.8905	23.9936	22.0612	15.942	0.161031	9.01771	2.73752	1.61031	0.161031	0.161031	2.0934	0	1.12721	0.322061	0	0.161031	0	100
6566	P	482638	4.59361e+06	80	9	139	109	65	4	54	15	0	4	3	8	7	2	1	1	2	0	503	15.9046	1.78926	27.6342	21.67	12.9225	0.795229	10.7356	2.98211	0	0.795229	0.596421	1.59046	1.39165	0.397614	0.198807	0.198807	0.397614	0	100
6609	P	484716	4.58823e+06	67	7	105	48	75	5	26	15	13	3	4	5	0	4	4	0	0	3	384	17.4479	1.82292	27.3438	12.5	19.5312	1.30208	6.77083	3.90625	3.38542	0.78125	1.04167	1.30208	0	1.04167	1.04167	0	0	0.78125	100
6611	P	488620	4.58842e+06	47	21	137	111	72	0	29	59	8	7	0	8	11	4	0	0	0	1	515	9.12621	4.07767	26.6019	21.5534	13.9806	0	5.63107	11.4563	1.5534	1.35922	0	1.5534	2.13592	0.776699	0	0	0	0.194175	100
6613	P	492068	4.58825e+06	55	34	112	109	75	1	49	48	3	4	1	9	10	2	0	0	3	1	516	10.6589	6.58915	21.7054	21.124	14.5349	0.193798	9.49612	9.30233	0.581395	0.775194	0.193798	1.74419	1.93798	0.387597	0	0	0.581395	0.193798	100
6638	P	489861	4.58635e+06	50	0	113	86	100	1	44	18	11	5	0	10	0	2	3	0	2	1	446	11.2108	0	25.3363	19.2825	22.4215	0.224215	9.86547	4.03587	2.46637	1.12108	0	2.24215	0	0.44843	0.672646	0	0.44843	0.224215	100
6640	P	486240	4.58623e+06	45	10	87	65	60	3	33	16	11	10	0	5	0	0	3	0	1	0	349	12.894	2.86533	24.9284	18.6246	17.192	0.859599	9.45559	4.58453	3.15186	2.86533	0	1.43266	0	0	0.859599	0	0.286533	0	100
6643	P	482174	4.58634e+06	118	53	154	61	5	0	31	16	13	7	0	2	10	0	0	2	1	0	473	24.9471	11.2051	32.5581	12.8964	1.05708	0	6.55391	3.38266	2.74841	1.47992	0	0.422833	2.11416	0	0	0.422833	0.211416	0	100
6676	P	492478	4.58268e+06	55	32	117	83	83	1	31	27	16	1	0	5	0	2	2	4	1	0	460	11.9565	6.95652	25.4348	18.0435	18.0435	0.217391	6.73913	5.86957	3.47826	0.217391	0	1.08696	0	0.434783	0.434783	0.869565	0.217391	0	100
6678	P	488660	4.58263e+06	52	6	102	65	55	6	31	18	7	9	1	4	1	3	2	1	2	1	366	14.2077	1.63934	27.8689	17.7596	15.0273	1.63934	8.46995	4.91803	1.91257	2.45902	0.273224	1.0929	0.273224	0.819672	0.546448	0.273224	0.546448	0.273224	100
6680	P	484941	4.58265e+06	69	16	61	48	39	6	20	11	11	2	1	3	2	1	1	3	2	0	296	23.3108	5.40541	20.6081	16.2162	13.1757	2.02703	6.75676	3.71622	3.71622	0.675676	0.337838	1.01351	0.675676	0.337838	0.337838	1.01351	0.675676	0	100
6683	P	482045	4.58346e+06	69	21	93	62	66	18	15	16	9	2	1	3	0	2	6	2	1	1	387	17.8295	5.42636	24.031	16.0207	17.0543	4.65116	3.87597	4.13437	2.32558	0.516796	0.258398	0.775194	0	0.516796	1.55039	0.516796	0.258398	0.258398	100
6689	P	486900	4.58076e+06	51	35	76	30	28	8	12	16	25	2	0	0	0	1	7	5	0	0	296	17.2297	11.8243	25.6757	10.1351	9.45946	2.7027	4.05405	5.40541	8.44595	0.675676	0	0	0	0.337838	2.36486	1.68919	0	0	100
6691	P	490415	4.58061e+06	51	22	118	97	91	6	38	9	2	0	1	3	5	4	7	0	7	0	461	11.0629	4.77223	25.5965	21.0412	19.7397	1.30152	8.24295	1.95228	0.433839	0	0.21692	0.650759	1.0846	0.867679	1.51844	0	1.51844	0	100
6694	P	494168	4.58105e+06	62	79	133	94	109	3	43	50	6	4	0	9	0	1	11	2	1	0	607	10.2142	13.0148	21.911	15.486	17.9572	0.494234	7.08402	8.23723	0.988468	0.658979	0	1.4827	0	0.164745	1.81219	0.329489	0.164745	0	100
6726	P	487325	4.57893e+06	64	19	63	52	53	11	24	15	11	8	4	2	2	0	1	1	1	0	331	19.3353	5.74018	19.0332	15.71	16.0121	3.32326	7.25076	4.53172	3.32326	2.41692	1.20846	0.60423	0.60423	0	0.302115	0.302115	0.302115	0	100
6735	P	490961	4.57689e+06	61	6	97	42	51	13	25	24	5	2	4	7	0	1	4	0	2	0	344	17.7326	1.74419	28.1977	12.2093	14.8256	3.77907	7.26744	6.97674	1.45349	0.581395	1.16279	2.03488	0	0.290698	1.16279	0	0.581395	0	100
6764	P	493209	4.57513e+06	69	16	104	96	43	2	23	18	17	3	0	7	0	2	1	0	1	0	402	17.1642	3.9801	25.8706	23.8806	10.6965	0.497512	5.72139	4.47761	4.22886	0.746269	0	1.74129	0	0.497512	0.248756	0	0.248756	0	100
6766	P	489572	4.57533e+06	42	4	46	37	81	11	18	29	12	7	6	2	8	1	0	0	1	0	305	13.7705	1.31148	15.082	12.1311	26.5574	3.60656	5.90164	9.5082	3.93443	2.29508	1.96721	0.655738	2.62295	0.327869	0	0	0.327869	0	100
6770	P	485961	4.5752e+06	69	2	67	50	119	52	28	19	3	7	14	1	0	6	4	2	0	1	444	15.5405	0.45045	15.0901	11.2613	26.8018	11.7117	6.30631	4.27928	0.675676	1.57658	3.15315	0.225225	0	1.35135	0.900901	0.45045	0	0.225225	100
6772	P	482199	4.57566e+06	85	147	65	35	43	42	21	5	1	1	2	1	1	5	0	0	1	1	456	18.6404	32.2368	14.2544	7.67544	9.42982	9.21053	4.60526	1.09649	0.219298	0.219298	0.438596	0.219298	0.219298	1.09649	0	0	0.219298	0.219298	100
6778	P	484578	4.57361e+06	76	13	261	51	75	32	23	5	6	7	16	7	4	1	2	0	1	2	582	13.0584	2.23368	44.8454	8.76289	12.8866	5.49828	3.95189	0.859107	1.03093	1.20275	2.74914	1.20275	0.687285	0.171821	0.343643	0	0.171821	0.343643	100
6780	P	488504	4.57395e+06	42	47	38	33	45	9	17	21	16	7	0	2	8	0	0	0	1	1	287	14.6341	16.3763	13.2404	11.4983	15.6794	3.13589	5.92334	7.31707	5.57491	2.43902	0	0.696864	2.78746	0	0	0	0.348432	0.348432	100
6781	P	490349	4.57365e+06	59	11	88	63	50	5	33	38	18	16	2	3	15	0	0	0	1	0	402	14.6766	2.73632	21.8905	15.6716	12.4378	1.24378	8.20896	9.45274	4.47761	3.9801	0.497512	0.746269	3.73134	0	0	0	0.248756	0	100
6783	P	493891	4.57383e+06	49	10	88	86	108	0	30	37	11	4	0	6	2	4	4	1	1	0	441	11.1111	2.26757	19.9546	19.5011	24.4898	0	6.80272	8.39002	2.49433	0.907029	0	1.36054	0.453515	0.907029	0.907029	0.226757	0.226757	0	100
6819	P	485410	4.57147e+06	62	16	58	43	46	11	15	14	0	4	0	2	4	2	0	2	0	2	281	22.0641	5.69395	20.6406	15.3025	16.3701	3.91459	5.33808	4.98221	0	1.42349	0	0.711744	1.42349	0.711744	0	0.711744	0	0.711744	100
6822	P	480461	4.57112e+06	70	29	41	53	38	12	18	12	2	6	2	1	1	3	4	1	2	0	295	23.7288	9.83051	13.8983	17.9661	12.8814	4.0678	6.10169	4.0678	0.677966	2.0339	0.677966	0.338983	0.338983	1.01695	1.35593	0.338983	0.677966	0	100
6827	P	482110	4.56965e+06	73	6	69	50	62	37	16	4	12	7	5	2	0	0	4	0	1	0	348	20.977	1.72414	19.8276	14.3678	17.8161	10.6322	4.5977	1.14943	3.44828	2.01149	1.43678	0.574713	0	0	1.14943	0	0.287356	0	100
6831	P	487634	4.5699e+06	35	13	33	25	48	12	23	23	6	3	0	2	4	1	0	0	0	0	228	15.3509	5.70175	14.4737	10.9649	21.0526	5.26316	10.0877	10.0877	2.63158	1.31579	0	0.877193	1.75439	0.438596	0	0	0	0	100
8664	A	478784	4.50817e+06	59	1	48	42	32	18	11	7	0	2	0	2	3	2	1	0	2	3	233	25.3219	0.429185	20.6009	18.0258	13.7339	7.72532	4.72103	3.00429	0	0.858369	0	0.858369	1.28755	0.858369	0.429185	0	0.858369	1.28755	100
8671	A	480242	4.50617e+06	77	3	48	38	53	41	12	3	0	5	3	1	1	1	0	4	0	3	293	26.2799	1.02389	16.3823	12.9693	18.0887	13.9932	4.09556	1.02389	0	1.70648	1.02389	0.341297	0.341297	0.341297	0	1.36519	0	1.02389	100
8673	A	483710	4.50606e+06	33	4	51	38	21	12	10	3	0	2	1	1	2	0	1	0	0	0	179	18.4358	2.23464	28.4916	21.2291	11.7318	6.70391	5.58659	1.67598	0	1.11732	0.558659	0.558659	1.11732	0	0.558659	0	0	0	100
8689	A	474242	4.50206e+06	27	0	40	29	14	2	12	8	0	0	0	2	1	5	0	3	0	2	145	18.6207	0	27.5862	20	9.65517	1.37931	8.27586	5.51724	0	0	0	1.37931	0.689655	3.44828	0	2.06897	0	1.37931	100
8692	A	479477	4.50214e+06	57	2	19	45	29	21	12	5	0	2	1	0	1	1	2	5	0	2	204	27.9412	0.980392	9.31373	22.0588	14.2157	10.2941	5.88235	2.45098	0	0.980392	0.490196	0	0.490196	0.490196	0.980392	2.45098	0	0.980392	100
8792	A	485448	4.50037e+06	53	10	32	47	19	2	13	9	0	3	0	3	0	1	0	1	0	1	194	27.3196	5.15464	16.4948	24.2268	9.79381	1.03093	6.70103	4.63918	0	1.54639	0	1.54639	0	0.515464	0	0.515464	0	0.515464	100
8794	A	481888	4.50023e+06	39	0	41	38	22	14	14	2	0	4	1	0	3	2	0	5	0	1	186	20.9677	0	22.043	20.4301	11.828	7.52688	7.52688	1.07527	0	2.15054	0.537634	0	1.6129	1.07527	0	2.68817	0	0.537634	100
8881	A	479077	4.49088e+06	78	0	49	54	114	87	28	8	0	2	11	1	1	2	3	1	1	0	440	17.7273	0	11.1364	12.2727	25.9091	19.7727	6.36364	1.81818	0	0.454545	2.5	0.227273	0.227273	0.454545	0.681818	0.227273	0.227273	0	100
8885	A	484555	4.49093e+06	60	0	133	94	83	1	49	9	0	4	0	11	2	5	0	0	4	1	456	13.1579	0	29.1667	20.614	18.2018	0.219298	10.7456	1.97368	0	0.877193	0	2.41228	0.438596	1.09649	0	0	0.877193	0.219298	100
8971	A	470577	4.50092e+06	98	3	34	14	36	41	12	4	0	1	0	2	0	2	0	3	0	0	250	39.2	1.2	13.6	5.6	14.4	16.4	4.8	1.6	0	0.4	0	0.8	0	0.8	0	1.2	0	0	100
8980	A	476051	4.49445e+06	51	4	32	25	50	32	13	4	0	0	4	1	4	0	0	0	0	2	222	22.973	1.8018	14.4144	11.2613	22.5225	14.4144	5.85586	1.8018	0	0	1.8018	0.45045	1.8018	0	0	0	0	0.900901	100
8985	A	473376	4.49284e+06	32	2	33	27	44	46	14	3	0	0	7	2	3	1	1	3	0	1	219	14.6119	0.913242	15.0685	12.3288	20.0913	21.0046	6.39269	1.36986	0	0	3.19635	0.913242	1.36986	0.456621	0.456621	1.36986	0	0.456621	100
8988	A	470006	4.49097e+06	53	4	26	25	61	36	13	4	0	5	6	0	1	1	0	0	0	0	235	22.5532	1.70213	11.0638	10.6383	25.9574	15.3191	5.53191	1.70213	0	2.12766	2.55319	0	0.425532	0.425532	0	0	0	0	100
8989	A	471998	4.49102e+06	64	0	78	42	68	77	24	4	1	1	5	0	0	3	0	1	1	1	370	17.2973	0	21.0811	11.3514	18.3784	20.8108	6.48649	1.08108	0.27027	0.27027	1.35135	0	0	0.810811	0	0.27027	0.27027	0.27027	100
8992	A	477143	4.49089e+06	50	1	39	58	44	29	9	1	0	1	4	0	0	0	1	1	0	1	239	20.9205	0.41841	16.318	24.2678	18.41	12.1339	3.76569	0.41841	0	0.41841	1.67364	0	0	0	0.41841	0.41841	0	0.41841	100
8994	A	480526	4.48901e+06	53	9	58	82	68	33	31	11	0	4	6	4	1	2	1	3	0	1	367	14.4414	2.45232	15.8038	22.3433	18.5286	8.99183	8.44687	2.99728	0	1.08992	1.63488	1.08992	0.27248	0.544959	0.27248	0.817439	0	0.27248	100
8996	A	475397	4.48914e+06	19	0	44	80	30	24	11	3	0	0	2	1	0	2	1	3	3	3	226	8.40708	0	19.469	35.3982	13.2743	10.6195	4.86726	1.32743	0	0	0.884956	0.442478	0	0.884956	0.442478	1.32743	1.32743	1.32743	100
9000	A	468038	4.4893e+06	146	3	16	27	142	128	14	9	0	4	6	1	0	1	1	1	1	3	503	29.0258	0.596421	3.18091	5.36779	28.2306	25.4473	2.7833	1.78926	0	0.795229	1.19284	0.198807	0	0.198807	0.198807	0.198807	0.198807	0.596421	100
9003	A	465183	4.48731e+06	96	1	46	43	85	77	14	2	0	3	5	1	0	1	1	0	3	0	378	25.3968	0.26455	12.1693	11.3757	22.4868	20.3704	3.7037	0.529101	0	0.793651	1.32275	0.26455	0	0.26455	0.26455	0	0.793651	0	100
9004	A	467065	4.4873e+06	81	0	3	3	81	115	3	0	0	0	11	0	0	3	0	0	3	0	303	26.7327	0	0.990099	0.990099	26.7327	37.9538	0.990099	0	0	0	3.63036	0	0	0.990099	0	0	0.990099	0	100
9034	A	464314	4.48565e+06	69	1	17	12	56	58	7	0	0	2	4	0	0	2	1	0	1	0	230	30	0.434783	7.3913	5.21739	24.3478	25.2174	3.04348	0	0	0.869565	1.73913	0	0	0.869565	0.434783	0	0.434783	0	100
9036	A	461477	4.48575e+06	139	1	41	22	58	74	3	1	0	2	6	1	1	4	0	0	0	0	353	39.3768	0.283286	11.6147	6.23229	16.4306	20.9632	0.849858	0.283286	0	0.566572	1.69972	0.283286	0.283286	1.13314	0	0	0	0	100
9076	A	460738	4.48165e+06	85	0	30	28	97	56	16	7	0	3	7	0	0	1	1	5	0	0	336	25.2976	0	8.92857	8.33333	28.869	16.6667	4.7619	2.08333	0	0.892857	2.08333	0	0	0.297619	0.297619	1.4881	0	0	100
9079	A	455895	4.4821e+06	121	6	23	17	54	59	13	0	0	0	1	0	1	1	0	1	1	5	303	39.934	1.9802	7.59076	5.61056	17.8218	19.4719	4.29043	0	0	0	0.330033	0	0.330033	0.330033	0	0.330033	0.330033	1.65017	100
9126	A	457911	4.47752e+06	163	2	45	23	60	106	13	2	1	0	13	2	0	1	0	0	2	0	433	37.6443	0.461894	10.3926	5.31178	13.8568	24.4804	3.00231	0.461894	0.230947	0	3.00231	0.461894	0	0.230947	0	0	0.461894	0	100
9129	A	452886	4.47757e+06	100	0	59	22	72	44	15	4	0	0	1	1	4	1	0	0	2	5	330	30.303	0	17.8788	6.66667	21.8182	13.3333	4.54545	1.21212	0	0	0.30303	0.30303	1.21212	0.30303	0	0	0.606061	1.51515	100
P27	N	487978	4.38226e+06	88	90	60	50	12	0	10	3	0	0	0	2	3	2	0	1	0	0	321	27.4143	28.0374	18.6916	15.5763	3.73832	0	3.11526	0.934579	0	0	0	0.623053	0.934579	0.623053	0	0.311526	0	0	100
P26	N	489696	4.38226e+06	122	302	30	19	6	0	4	0	0	0	0	0	0	0	0	0	1	0	484	25.2066	62.3967	6.19835	3.92562	1.23967	0	0.826446	0	0	0	0	0	0	0	0	0	0.206612	0	100
P25	N	492272	4.38226e+06	88	461	36	19	13	0	1	13	0	1	0	0	2	0	1	0	0	0	635	13.8583	72.5984	5.66929	2.99213	2.04724	0	0.15748	2.04724	0	0.15748	0	0	0.314961	0	0.15748	0	0	0	100
P24	N	493131	4.38226e+06	169	336	46	39	31	0	8	5	0	1	0	2	1	0	1	1	0	0	640	26.4062	52.5	7.1875	6.09375	4.84375	0	1.25	0.78125	0	0.15625	0	0.3125	0.15625	0	0.15625	0.15625	0	0	100
P20	N	492284	4.39446e+06	94	242	30	18	5	0	1	0	0	1	0	1	0	0	0	0	3	0	395	23.7975	61.2658	7.59494	4.55696	1.26582	0	0.253165	0	0	0.253165	0	0.253165	0	0	0	0	0.759494	0	100
P21	N	489706	4.39003e+06	109	249	57	34	33	0	14	12	0	0	0	2	1	1	3	1	0	0	516	21.124	48.2558	11.0465	6.58915	6.39535	0	2.71318	2.32558	0	0	0	0.387597	0.193798	0.193798	0.581395	0.193798	0	0	100
P22	N	488844	4.3867e+06	70	40	104	83	50	0	17	37	0	5	0	1	2	0	1	3	0	0	413	16.9492	9.68523	25.1816	20.0969	12.1065	0	4.11622	8.95884	0	1.21065	0	0.242131	0.484262	0	0.242131	0.726392	0	0	100
P23	N	487122	4.38337e+06	94	491	18	11	0	0	1	0	0	0	0	0	0	0	0	0	3	0	618	15.2104	79.4498	2.91262	1.77994	0	0	0.161812	0	0	0	0	0	0	0	0	0	0.485437	0	100
P28	N	486261	4.38227e+06	126	374	21	6	3	0	0	0	0	0	0	0	0	0	0	0	0	0	530	23.7736	70.566	3.96226	1.13208	0.566038	0	0	0	0	0	0	0	0	0	0	0	0	0	100
P29	N	486259	4.38116e+06	48	554	9	5	3	0	0	0	0	0	0	0	0	0	0	0	4	0	623	7.70465	88.9246	1.44462	0.802568	0.481541	0	0	0	0	0	0	0	0	0	0	0	0.642055	0	100
P30	N	485398	4380046	36	107	61	68	5	0	16	1	1	0	0	2	2	1	0	0	1	0	301	11.9601	35.5482	20.2658	22.5914	1.66113	0	5.31561	0.332226	0.332226	0	0	0.664452	0.664452	0.332226	0	0	0.332226	0	100
P32	N	483671	4.37561e+06	13	49	68	105	35	0	26	11	3	0	0	1	0	0	1	0	0	1	313	4.15335	15.655	21.7252	33.5463	11.1821	0	8.30671	3.51438	0.958466	0	0	0.319489	0	0	0.319489	0	0	0.319489	100
P34	N	481944	4.37229e+06	11	38	42	199	68	0	56	5	0	1	1	0	0	0	0	0	0	0	421	2.61283	9.02613	9.97625	47.2684	16.152	0	13.3017	1.18765	0	0.23753	0.23753	0	0	0	0	0	0	0	100
P33	N	481093	4.37562e+06	45	324	31	80	14	0	8	1	0	0	0	1	0	0	0	0	0	0	504	8.92857	64.2857	6.15079	15.873	2.77778	0	1.5873	0.198413	0	0	0	0.198413	0	0	0	0	0	0	100
P31	N	479383	4.37895e+06	56	244	30	21	4	0	4	0	0	0	0	1	0	0	0	0	0	0	360	15.5556	67.7778	8.33333	5.83333	1.11111	0	1.11111	0	0	0	0	0.277778	0	0	0	0	0	0	100
P15	N	483713	4.39559e+06	70	390	85	69	19	0	16	2	0	1	0	2	0	0	1	1	2	2	660	10.6061	59.0909	12.8788	10.4545	2.87879	0	2.42424	0.30303	0	0.151515	0	0.30303	0	0	0.151515	0.151515	0.30303	0.30303	100
P16	N	482851	4.39337e+06	67	312	29	19	5	0	4	0	0	0	0	0	0	0	0	0	2	0	438	15.2968	71.2329	6.621	4.3379	1.14155	0	0.913242	0	0	0	0	0	0	0	0	0	0.456621	0	100
P17	N	481991	4.39226e+06	12	68	14	10	5	0	2	1	0	2	0	1	0	1	1	0	0	0	117	10.2564	58.1197	11.9658	8.54701	4.2735	0	1.7094	0.854701	0	1.7094	0	0.854701	0	0.854701	0.854701	0	0	0	100
P18	N	480270	4.39005e+06	106	394	38	13	1	0	3	0	0	0	0	0	0	0	0	0	0	0	555	19.0991	70.991	6.84685	2.34234	0.18018	0	0.540541	0	0	0	0	0	0	0	0	0	0	0	100
P19	N	478548	4.38783e+06	71	294	35	11	0	0	1	0	0	0	0	1	0	0	0	1	0	0	414	17.1498	71.0145	8.45411	2.657	0	0	0.241546	0	0	0	0	0.241546	0	0	0	0.241546	0	0	100
P35	N	471631	4.37343e+06	16	262	7	13	2	0	0	0	0	0	0	0	0	0	0	0	0	0	300	5.33333	87.3333	2.33333	4.33333	0.666667	0	0	0	0	0	0	0	0	0	0	0	0	0	100
P36	N	477623	4.36453e+06	18	10	27	173	47	0	40	10	0	1	0	0	0	0	0	0	0	0	326	5.52147	3.06748	8.28221	53.0675	14.4172	0	12.2699	3.06748	0	0.306748	0	0	0	0	0	0	0	0	100
