# Supplementary material for: Interpretation of Sedimentary Processes Using Heavy Mineral Unconstrained Data
Source: Preprints.org preprint supplement (doi:10.20944/preprints201810.0280.v1), 2018-10-15
Supplement: Supplementary file 9 [file Table_S1_main heavy mineral suite.xlsx]

## Sheet: Folha1
MAIN HEAVY MINERAL SUITE
		UTM coordinates		main heavy minerals (count data)										main heavy minerals (percentages)
Original ID	Paper ID	X	Y	Am	Mi	And	To	Ga	Py	St	Zi	Ap	sum	Am	Mi	And	To	Ga	Py	St	Zi	Ap	sum
6562	P	490355	4.59351e+06	73	97	138	86	106	8	40	28	17	593	12.3103	16.3575	23.2715	14.5025	17.8752	1.34907	6.74536	4.72175	2.86678	100
6564	P	486670	4.59365e+06	78	49	149	137	99	1	56	17	10	596	13.0872	8.22148	25	22.9866	16.6107	0.167785	9.39597	2.85235	1.67785	100
6566	P	482638	4.59361e+06	80	9	139	109	65	4	54	15	0	475	16.8421	1.89474	29.2632	22.9474	13.6842	0.842105	11.3684	3.15789	0	100
6609	P	484716	4.58823e+06	67	7	105	48	75	5	26	15	13	361	18.5596	1.93906	29.0859	13.2964	20.7756	1.38504	7.20222	4.15512	3.60111	100
6611	P	488620	4.58842e+06	47	21	137	111	72	0	29	59	8	484	9.71074	4.33884	28.3058	22.9339	14.876	0	5.99174	12.1901	1.65289	100
6613	P	492068	4.58825e+06	55	34	112	109	75	1	49	48	3	486	11.3169	6.99588	23.0453	22.428	15.4321	0.205761	10.0823	9.87654	0.617284	100
6638	P	489861	4.58635e+06	50	0	113	86	100	1	44	18	11	423	11.8203	0	26.7139	20.331	23.6407	0.236407	10.4019	4.25532	2.60047	100
6640	P	486240	4.58623e+06	45	10	87	65	60	3	33	16	11	330	13.6364	3.0303	26.3636	19.697	18.1818	0.909091	10	4.84848	3.33333	100
6643	P	482174	4.58634e+06	118	53	154	61	5	0	31	16	13	451	26.1641	11.7517	34.1463	13.5255	1.10865	0	6.87361	3.54767	2.88248	100
6676	P	492478	4.58268e+06	55	32	117	83	83	1	31	27	16	445	12.3596	7.19101	26.2921	18.6517	18.6517	0.224719	6.96629	6.06742	3.59551	100
6678	P	488660	4.58263e+06	52	6	102	65	55	6	31	18	7	342	15.2047	1.75439	29.8246	19.0058	16.0819	1.75439	9.06433	5.26316	2.04678	100
6680	P	484941	4.58265e+06	69	16	61	48	39	6	20	11	11	281	24.5552	5.69395	21.7082	17.0819	13.879	2.13523	7.11744	3.91459	3.91459	100
6683	P	482045	4.58346e+06	69	21	93	62	66	18	15	16	9	369	18.6992	5.69106	25.2033	16.8022	17.8862	4.87805	4.06504	4.33604	2.43902	100
6689	P	486900	4.58076e+06	51	35	76	30	28	8	12	16	25	281	18.1495	12.4555	27.0463	10.6762	9.96441	2.84698	4.27046	5.69395	8.8968	100
6691	P	490415	4.58061e+06	51	22	118	97	91	6	38	9	2	434	11.7512	5.06912	27.1889	22.3502	20.9677	1.38249	8.75576	2.07373	0.460829	100
6694	P	494168	4.58105e+06	72	79	133	94	109	3	43	50	6	589	12.2241	13.4126	22.5806	15.9593	18.5059	0.509338	7.30051	8.48896	1.01868	100
6726	P	487325	4.57893e+06	64	19	63	51	53	11	24	15	11	311	20.5788	6.10932	20.2572	16.3987	17.0418	3.53698	7.71704	4.82315	3.53698	100
6735	P	490961	4.57689e+06	61	6	97	42	51	13	25	24	5	324	18.8272	1.85185	29.9383	12.963	15.7407	4.01235	7.71605	7.40741	1.54321	100
6764	P	493209	4.57513e+06	69	16	104	96	43	2	23	18	17	388	17.7835	4.12371	26.8041	24.7423	11.0825	0.515464	5.92784	4.63918	4.38144	100
6766	P	489572	4.57533e+06	44	4	46	37	81	10	18	29	12	281	15.6584	1.42349	16.3701	13.1673	28.8256	3.55872	6.40569	10.3203	4.27046	100
6770	P	485961	4.5752e+06	69	2	67	50	109	52	28	19	3	399	17.2932	0.501253	16.792	12.5313	27.3183	13.0326	7.01754	4.7619	0.75188	100
6772	P	482199	4.57566e+06	85	147	65	35	43	42	21	5	1	444	19.1441	33.1081	14.6396	7.88288	9.68468	9.45946	4.72973	1.12613	0.225225	100
6778	P	484578	4.57361e+06	77	13	62	51	75	32	23	5	6	344	22.3837	3.77907	18.0233	14.8256	21.8023	9.30233	6.68605	1.45349	1.74419	100
6780	P	488504	4.57395e+06	44	47	38	33	45	11	17	21	16	272	16.1765	17.2794	13.9706	12.1324	16.5441	4.04412	6.25	7.72059	5.88235	100
6781	P	490349	4.57365e+06	59	11	88	63	50	5	33	38	18	365	16.1644	3.0137	24.1096	17.2603	13.6986	1.36986	9.0411	10.411	4.93151	100
6783	P	493891	4.57383e+06	49	10	88	86	108	0	30	37	11	419	11.6945	2.38663	21.0024	20.5251	25.7757	0	7.1599	8.83055	2.6253	100
6819	P	485410	4.57147e+06	62	16	58	43	46	11	15	14	0	265	23.3962	6.03774	21.8868	16.2264	17.3585	4.15094	5.66038	5.28302	0	100
6822	P	480461	4.57112e+06	70	29	41	53	38	12	18	12	2	275	25.4545	10.5455	14.9091	19.2727	13.8182	4.36364	6.54545	4.36364	0.727273	100
6827	P	482110	4.56965e+06	73	6	69	50	62	37	16	4	12	329	22.1884	1.82371	20.9726	15.1976	18.845	11.2462	4.86322	1.21581	3.64742	100
6831	P	487634	4.5699e+06	35	13	33	25	48	12	23	23	6	218	16.055	5.9633	15.1376	11.4679	22.0183	5.50459	10.5505	10.5505	2.75229	100
8664	A	478784	4.50817e+06	59	1	48	42	32	18	11	7	0	218	27.0642	0.458716	22.0183	19.2661	14.6789	8.25688	5.04587	3.21101	0	100
8671	A	480242	4.50617e+06	77	3	48	38	53	41	12	3	0	275	28	1.09091	17.4545	13.8182	19.2727	14.9091	4.36364	1.09091	0	100
8673	A	483710	4.50606e+06	33	4	51	38	21	12	10	3	0	172	19.186	2.32558	29.6512	22.093	12.2093	6.97674	5.81395	1.74419	0	100
8689	A	474242	4.50206e+06	27	0	40	29	14	2	12	8	0	132	20.4545	0	30.303	21.9697	10.6061	1.51515	9.09091	6.06061	0	100
8692	A	479477	4.50214e+06	57	2	19	45	29	21	12	5	0	190	30	1.05263	10	23.6842	15.2632	11.0526	6.31579	2.63158	0	100
8792	A	485448	4.50037e+06	53	10	32	47	19	2	13	9	0	185	28.6486	5.40541	17.2973	25.4054	10.2703	1.08108	7.02703	4.86486	0	100
8794	A	481888	4.50023e+06	39	0	41	38	22	14	14	2	0	170	22.9412	0	24.1176	22.3529	12.9412	8.23529	8.23529	1.17647	0	100
8881	A	479077	4.49088e+06	78	0	49	54	114	87	28	8	0	418	18.6603	0	11.7225	12.9187	27.2727	20.8134	6.69856	1.91388	0	100
8885	A	484555	4.49093e+06	60	0	133	94	83	1	49	9	0	429	13.986	0	31.0023	21.9114	19.3473	0.2331	11.4219	2.0979	0	100
8971	A	470577	4.50092e+06	98	3	34	14	36	41	12	4	0	242	40.4959	1.23967	14.0496	5.78512	14.876	16.9421	4.95868	1.65289	0	100
8980	A	476051	4.49445e+06	51	4	32	25	50	32	13	4	0	211	24.1706	1.89573	15.1659	11.8483	23.6967	15.1659	6.16114	1.89573	0	100
8985	A	473376	4.49284e+06	32	2	33	27	44	46	14	3	0	201	15.9204	0.995025	16.4179	13.4328	21.8905	22.8856	6.96517	1.49254	0	100
8988	A	470006	4.49097e+06	53	4	26	25	61	36	13	4	0	222	23.8739	1.8018	11.7117	11.2613	27.4775	16.2162	5.85586	1.8018	0	100
8989	A	471998	4.49102e+06	64	0	78	42	68	77	24	4	1	358	17.8771	0	21.7877	11.7318	18.9944	21.5084	6.70391	1.11732	0.27933	100
8992	A	477143	4.49089e+06	50	1	39	58	44	29	9	1	0	231	21.645	0.4329	16.8831	25.1082	19.0476	12.5541	3.8961	0.4329	0	100
8994	A	480526	4.48901e+06	53	9	58	82	68	33	31	11	0	345	15.3623	2.6087	16.8116	23.7681	19.7101	9.56522	8.98551	3.18841	0	100
8996	A	475397	4.48914e+06	19	0	44	80	30	24	11	3	0	211	9.00474	0	20.8531	37.9147	14.218	11.3744	5.21327	1.4218	0	100
9000	A	468038	4.4893e+06	146	3	16	27	142	128	14	9	0	485	30.1031	0.618557	3.29897	5.56701	29.2784	26.3918	2.8866	1.85567	0	100
9003	A	465183	4.48731e+06	96	1	46	43	85	77	14	2	0	364	26.3736	0.274725	12.6374	11.8132	23.3516	21.1538	3.84615	0.549451	0	100
9004	A	467065	4.4873e+06	81	0	3	3	81	115	3	0	0	286	28.3217	0	1.04895	1.04895	28.3217	40.2098	1.04895	0	0	100
9034	A	464314	4.48565e+06	70	1	17	13	59	62	7	0	0	229	30.5677	0.436681	7.42358	5.67686	25.7642	27.0742	3.05677	0	0	100
9036	A	461477	4.48575e+06	139	1	41	22	58	74	3	1	0	339	41.0029	0.294985	12.0944	6.48968	17.1091	21.8289	0.884956	0.294985	0	100
9076	A	460738	4.48165e+06	85	0	30	28	97	56	16	7	0	319	26.6458	0	9.40439	8.77743	30.4075	17.5549	5.01567	2.19436	0	100
9079	A	455895	4.4821e+06	121	6	23	17	54	59	13	0	0	293	41.2969	2.04778	7.84983	5.80205	18.43	20.1365	4.43686	0	0	100
9126	A	457911	4.47752e+06	163	2	45	23	60	106	13	2	1	415	39.2771	0.481928	10.8434	5.54217	14.4578	25.5422	3.13253	0.481928	0.240964	100
9129	A	452886	4.47757e+06	100	0	59	22	72	44	15	4	0	316	31.6456	0	18.6709	6.96203	22.7848	13.9241	4.74684	1.26582	0	100
P27	N	487978	4.38226e+06	88	90	60	50	12	0	10	3	0	313	28.115	28.754	19.1693	15.9744	3.83387	0	3.19489	0.958466	0	100
P26	N	489696	4.38226e+06	122	302	30	19	6	0	4	0	0	483	25.2588	62.5259	6.21118	3.93375	1.24224	0	0.828157	0	0	100
P25	N	492272	4.38226e+06	88	461	36	19	13	0	1	13	0	631	13.9461	73.0586	5.70523	3.01109	2.06022	0	0.158479	2.06022	0	100
P24	N	493131	4.38226e+06	169	336	46	39	31	0	8	5	0	634	26.6562	52.9968	7.25552	6.15142	4.88959	0	1.26183	0.788644	0	100
P20	N	492284	4.39446e+06	94	242	30	18	5	0	1	0	0	390	24.1026	62.0513	7.69231	4.61538	1.28205	0	0.25641	0	0	100
P21	N	489706	4.39003e+06	109	249	57	34	33	0	14	12	0	508	21.4567	49.0157	11.2205	6.69291	6.49606	0	2.75591	2.3622	0	100
P22	N	488844	4.3867e+06	70	40	104	83	50	0	17	37	0	401	17.4564	9.97506	25.9352	20.6983	12.4688	0	4.2394	9.22693	0	100
P23	N	487122	4.38337e+06	94	491	18	11	0	0	1	0	0	615	15.2846	79.8374	2.92683	1.78862	0	0	0.162602	0	0	100
P28	N	486261	4.38227e+06	126	374	21	6	3	0	0	0	0	530	23.7736	70.566	3.96226	1.13208	0.566038	0	0	0	0	100
P29	N	486259	4.38116e+06	48	554	9	5	3	0	0	0	0	619	7.75444	89.4992	1.45396	0.807754	0.484653	0	0	0	0	100
P30	N	485398	4380046	36	107	61	68	5	0	16	1	1	295	12.2034	36.2712	20.678	23.0508	1.69492	0	5.42373	0.338983	0.338983	100
P32	N	483671	4.37561e+06	13	49	68	105	35	0	26	11	3	310	4.19355	15.8065	21.9355	33.871	11.2903	0	8.3871	3.54839	0.967742	100
P34	N	481944	4.37229e+06	11	38	42	199	68	0	56	5	0	419	2.6253	9.06921	10.0239	47.494	16.2291	0	13.3652	1.19332	0	100
P33	N	481093	4.37562e+06	45	324	31	80	14	0	8	1	0	503	8.94632	64.4135	6.16302	15.9046	2.7833	0	1.59046	0.198807	0	100
P31	N	479383	4.37895e+06	56	244	30	21	4	0	4	0	0	359	15.5989	67.9666	8.35655	5.84958	1.11421	0	1.11421	0	0	100
P15	N	483713	4.39559e+06	70	390	85	69	19	0	16	2	0	651	10.7527	59.9078	13.0568	10.5991	2.91859	0	2.45776	0.30722	0	100
P16	N	482851	4.39337e+06	67	312	29	19	5	0	4	0	0	436	15.367	71.5596	6.65138	4.3578	1.14679	0	0.917431	0	0	100
P17	N	481991	4.39226e+06	12	68	14	10	5	0	2	1	0	112	10.7143	60.7143	12.5	8.92857	4.46429	0	1.78571	0.892857	0	100
P18	N	480270	4.39005e+06	106	394	38	13	1	0	3	0	0	555	19.0991	70.991	6.84685	2.34234	0.18018	0	0.540541	0	0	100
P19	N	478548	4.38783e+06	71	294	35	11	0	0	1	0	0	412	17.233	71.3592	8.49515	2.6699	0	0	0.242718	0	0	100
P35	N	471631	4.37343e+06	16	262	7	13	2	0	0	0	0	300	5.33333	87.3333	2.33333	4.33333	0.666667	0	0	0	0	100
P36	N	477623	4.36453e+06	18	10	27	173	47	0	40	10	0	325	5.53846	3.07692	8.30769	53.2308	14.4615	0	12.3077	3.07692	0	100
