# Supplementary material for: Interpretation of Sedimentary Processes Using Heavy Mineral Unconstrained Data
Source: Preprints.org preprint supplement (doi:10.20944/preprints201810.0280.v1), 2018-10-15
Supplement: Supplementary file 11 [file Table_S3_data matrix without zeros.xlsx]

## Sheet: WMARG_78_9
DATA MATRIX WITHOUT ZEROS
		UTM coordinates		main heavy minerals (without zeros; sum=1)										main heavy minerals (without zeros; sum=100 %)
Original ID	Paper ID	X	Y	Am	Mi	And	To	Ga	Py	St	Zi	Ap	sum	Am	Mi	And	To	Ga	Py	St	Zi	Ap	sum
6562	P	490355	4.59351e+06	0.123103	0.163575	0.232715	0.145025	0.178752	0.0134907	0.0674536	0.0472175	0.0286678	1	12.3103	16.3575	23.2715	14.5025	17.8752	1.34907	6.74536	4.72175	2.86678	100
6564	P	486670	4.59365e+06	0.130872	0.0822148	0.25	0.229866	0.166107	0.00167785	0.0939597	0.0285235	0.0167785	1	13.0872	8.22148	25	22.9866	16.6107	0.167785	9.39597	2.85235	1.67785	100
6566	P	482638	4.59361e+06	0.168376	0.0189423	0.292553	0.229412	0.136806	0.0084188	0.113654	0.0315705	0.000267336	1	16.8376	1.89423	29.2553	22.9412	13.6806	0.84188	11.3654	3.15705	0.0267336	100
6609	P	484716	4.58823e+06	0.185596	0.0193906	0.290859	0.132964	0.207756	0.0138504	0.0720222	0.0415512	0.0360111	1	18.5596	1.93906	29.0859	13.2964	20.7756	1.38504	7.20222	4.15512	3.60111	100
6611	P	488620	4.58842e+06	0.0969687	0.0433264	0.282653	0.229011	0.148548	0.00142919	0.0598317	0.121727	0.0165053	1	9.69687	4.33264	28.2653	22.9011	14.8548	0.142919	5.98317	12.1727	1.65053	100
6613	P	492068	4.58825e+06	0.113169	0.0699588	0.230453	0.22428	0.154321	0.00205761	0.100823	0.0987654	0.00617284	1	11.3169	6.99588	23.0453	22.428	15.4321	0.205761	10.0823	9.87654	0.617284	100
6638	P	489861	4.58635e+06	0.117992	0.00178571	0.266662	0.202947	0.235984	0.00235984	0.103833	0.0424772	0.0259583	1	11.7992	0.178571	26.6662	20.2947	23.5984	0.235984	10.3833	4.24772	2.59583	100
6640	P	486240	4.58623e+06	0.136364	0.030303	0.263636	0.19697	0.181818	0.00909091	0.1	0.0484848	0.0333333	1	13.6364	3.0303	26.3636	19.697	18.1818	0.909091	10	4.84848	3.33333	100
6643	P	482174	4.58634e+06	0.261242	0.117338	0.340943	0.135049	0.0110696	0.00152403	0.0686314	0.0354227	0.0287809	1	26.1242	11.7338	34.0943	13.5049	1.10696	0.152403	6.86314	3.54227	2.87809	100
6676	P	492478	4.58268e+06	0.123596	0.0719101	0.262921	0.186517	0.186517	0.00224719	0.0696629	0.0606742	0.0359551	1	12.3596	7.19101	26.2921	18.6517	18.6517	0.224719	6.96629	6.06742	3.59551	100
6678	P	488660	4.58263e+06	0.152047	0.0175439	0.298246	0.190058	0.160819	0.0175439	0.0906433	0.0526316	0.0204678	1	15.2047	1.75439	29.8246	19.0058	16.0819	1.75439	9.06433	5.26316	2.04678	100
6680	P	484941	4.58265e+06	0.245552	0.0569395	0.217082	0.170819	0.13879	0.0213523	0.0711744	0.0391459	0.0391459	1	24.5552	5.69395	21.7082	17.0819	13.879	2.13523	7.11744	3.91459	3.91459	100
6683	P	482045	4.58346e+06	0.186992	0.0569106	0.252033	0.168022	0.178862	0.0487805	0.0406504	0.0433604	0.0243902	1	18.6992	5.69106	25.2033	16.8022	17.8862	4.87805	4.06504	4.33604	2.43902	100
6689	P	486900	4.58076e+06	0.181495	0.124555	0.270463	0.106762	0.0996441	0.0284698	0.0427046	0.0569395	0.088968	1	18.1495	12.4555	27.0463	10.6762	9.96441	2.84698	4.27046	5.69395	8.8968	100
6691	P	490415	4.58061e+06	0.117512	0.0506912	0.271889	0.223502	0.209677	0.0138249	0.0875576	0.0207373	0.00460829	1	11.7512	5.06912	27.1889	22.3502	20.9677	1.38249	8.75576	2.07373	0.460829	100
6694	P	494168	4.58105e+06	0.122241	0.134126	0.225806	0.159593	0.185059	0.00509338	0.0730051	0.0848896	0.0101868	1	12.2241	13.4126	22.5806	15.9593	18.5059	0.509338	7.30051	8.48896	1.01868	100
6726	P	487325	4.57893e+06	0.205788	0.0610932	0.202572	0.163987	0.170418	0.0353698	0.0771704	0.0482315	0.0353698	1	20.5788	6.10932	20.2572	16.3987	17.0418	3.53698	7.71704	4.82315	3.53698	100
6735	P	490961	4.57689e+06	0.188272	0.0185185	0.299383	0.12963	0.157407	0.0401235	0.0771605	0.0740741	0.0154321	1	18.8272	1.85185	29.9383	12.963	15.7407	4.01235	7.71605	7.40741	1.54321	100
6764	P	493209	4.57513e+06	0.177835	0.0412371	0.268041	0.247423	0.110825	0.00515464	0.0592784	0.0463918	0.0438144	1	17.7835	4.12371	26.8041	24.7423	11.0825	0.515464	5.92784	4.63918	4.38144	100
6766	P	489572	4.57533e+06	0.156584	0.0142349	0.163701	0.131673	0.288256	0.0355872	0.0640569	0.103203	0.0427046	1	15.6584	1.42349	16.3701	13.1673	28.8256	3.55872	6.40569	10.3203	4.27046	100
6770	P	485961	4.5752e+06	0.172932	0.00501253	0.16792	0.125313	0.273183	0.130326	0.0701754	0.047619	0.0075188	1	17.2932	0.501253	16.792	12.5313	27.3183	13.0326	7.01754	4.7619	0.75188	100
6772	P	482199	4.57566e+06	0.191441	0.331081	0.146396	0.0788288	0.0968468	0.0945946	0.0472973	0.0112613	0.00225225	1	19.1441	33.1081	14.6396	7.88288	9.68468	9.45946	4.72973	1.12613	0.225225	100
6778	P	484578	4.57361e+06	0.223837	0.0377907	0.180233	0.148256	0.218023	0.0930233	0.0668605	0.0145349	0.0174419	1	22.3837	3.77907	18.0233	14.8256	21.8023	9.30233	6.68605	1.45349	1.74419	100
6780	P	488504	4.57395e+06	0.161765	0.172794	0.139706	0.121324	0.165441	0.0404412	0.0625	0.0772059	0.0588235	1	16.1765	17.2794	13.9706	12.1324	16.5441	4.04412	6.25	7.72059	5.88235	100
6781	P	490349	4.57365e+06	0.161644	0.030137	0.241096	0.172603	0.136986	0.0136986	0.090411	0.10411	0.0493151	1	16.1644	3.0137	24.1096	17.2603	13.6986	1.36986	9.0411	10.411	4.93151	100
6783	P	493891	4.57383e+06	0.116753	0.0238272	0.209679	0.204914	0.257334	0.00163988	0.0714816	0.0881607	0.0262099	1	11.6753	2.38272	20.9679	20.4914	25.7334	0.163988	7.14816	8.81607	2.62099	100
6819	P	485410	4.57147e+06	0.233853	0.0603492	0.218766	0.162189	0.173504	0.0414901	0.0565774	0.0528056	0.000466075	1	23.3853	6.03492	21.8766	16.2189	17.3504	4.14901	5.65774	5.28056	0.0466075	100
6822	P	480461	4.57112e+06	0.254545	0.105455	0.149091	0.192727	0.138182	0.0436364	0.0654545	0.0436364	0.00727273	1	25.4545	10.5455	14.9091	19.2727	13.8182	4.36364	6.54545	4.36364	0.727273	100
6827	P	482110	4.56965e+06	0.221884	0.0182371	0.209726	0.151976	0.18845	0.112462	0.0486322	0.0121581	0.0364742	1	22.1884	1.82371	20.9726	15.1976	18.845	11.2462	4.86322	1.21581	3.64742	100
6831	P	487634	4.5699e+06	0.16055	0.059633	0.151376	0.114679	0.220183	0.0550459	0.105505	0.105505	0.0275229	1	16.055	5.9633	15.1376	11.4679	22.0183	5.50459	10.5505	10.5505	2.75229	100
8664	A	478784	4.50817e+06	0.270491	0.00458459	0.22006	0.192553	0.146707	0.0825226	0.0504305	0.0320921	0.000560049	1	27.0491	0.458459	22.006	19.2553	14.6707	8.25226	5.04305	3.20921	0.0560049	100
8671	A	480242	4.50617e+06	0.279874	0.0109042	0.174467	0.13812	0.192641	0.149024	0.0436167	0.0109042	0.000450071	1	27.9874	1.09042	17.4467	13.812	19.2641	14.9024	4.36167	1.09042	0.0450071	100
8673	A	483710	4.50606e+06	0.191727	0.0232396	0.296305	0.220776	0.122008	0.0697187	0.0580989	0.0174297	0.000698188	1	19.1727	2.32396	29.6305	22.0776	12.2008	6.97187	5.80989	1.74297	0.0698188	100
8689	A	474242	4.50206e+06	0.203998	0.00178571	0.302219	0.219109	0.105777	0.015111	0.0906658	0.0604439	0.000890352	1	20.3998	0.178571	30.2219	21.9109	10.5777	1.5111	9.06658	6.04439	0.0890352	100
8692	A	479477	4.50214e+06	0.299809	0.0105196	0.0999363	0.236691	0.152534	0.110456	0.0631177	0.026299	0.000636943	1	29.9809	1.05196	9.99363	23.6691	15.2534	11.0456	6.31177	2.6299	0.0636943	100
8792	A	485448	4.50037e+06	0.2863	0.0540188	0.17286	0.253888	0.102636	0.0108038	0.0702244	0.0486169	0.000652648	1	28.63	5.40188	17.286	25.3888	10.2636	1.08038	7.02244	4.86169	0.0652648	100
8794	A	481888	4.50023e+06	0.22884	0.00178571	0.240576	0.222972	0.129089	0.0821477	0.0821477	0.0117354	0.000705934	1	22.884	0.178571	24.0576	22.2972	12.9089	8.21477	8.21477	1.17354	0.0705934	100
8881	A	479077	4.49088e+06	0.186213	0.00178571	0.11698	0.128917	0.272158	0.207699	0.0668457	0.0190988	0.000302908	1	18.6213	0.178571	11.698	12.8917	27.2158	20.7699	6.68457	1.90988	0.0302908	100
8885	A	484555	4.49093e+06	0.139569	0.00178571	0.309378	0.218658	0.193071	0.00232615	0.113982	0.0209354	0.000294586	1	13.9569	0.178571	30.9378	21.8658	19.3071	0.232615	11.3982	2.09354	0.0294586	100
8971	A	470577	4.50092e+06	0.404753	0.0123904	0.140425	0.0578219	0.148685	0.169335	0.0495616	0.0165205	0.000507899	1	40.4753	1.23904	14.0425	5.78219	14.8685	16.9335	4.95616	1.65205	0.0507899	100
8980	A	476051	4.49445e+06	0.241567	0.0189464	0.151571	0.118415	0.23683	0.151571	0.0615758	0.0189464	0.000577743	1	24.1567	1.89464	15.1571	11.8415	23.683	15.1571	6.15758	1.89464	0.0577743	100
8985	A	473376	4.49284e+06	0.159108	0.00994423	0.16408	0.134247	0.218773	0.228717	0.0696096	0.0149163	0.000605008	1	15.9108	0.994423	16.408	13.4247	21.8773	22.8717	6.96096	1.49163	0.0605008	100
8988	A	470006	4.49097e+06	0.238607	0.0180081	0.117053	0.112551	0.274623	0.162073	0.0585263	0.0180081	0.000550951	1	23.8607	1.80081	11.7053	11.2551	27.4623	16.2073	5.85263	1.80081	0.0550951	100
8989	A	471998	4.49102e+06	0.178452	0.00178571	0.217488	0.117109	0.189605	0.2147	0.0669194	0.0111532	0.00278831	1	17.8452	0.178571	21.7488	11.7109	18.9605	21.47	6.69194	1.11532	0.278831	100
8992	A	477143	4.49089e+06	0.216335	0.00432671	0.168742	0.250949	0.190375	0.125475	0.0389404	0.00432671	0.000530321	1	21.6335	0.432671	16.8742	25.0949	19.0375	12.5475	3.89404	0.432671	0.0530321	100
8994	A	480526	4.48901e+06	0.153567	0.0260775	0.168055	0.237595	0.19703	0.0956174	0.0898224	0.0318725	0.00036323	1	15.3567	2.60775	16.8055	23.7595	19.703	9.56174	8.98224	3.18725	0.036323	100
8996	A	475397	4.48914e+06	0.0898346	0.00178571	0.208038	0.378251	0.141844	0.113475	0.0520095	0.0141844	0.00057754	1	8.98346	0.178571	20.8038	37.8251	14.1844	11.3475	5.20095	1.41844	0.057754	100
9000	A	468038	4.4893e+06	0.300952	0.00618394	0.032981	0.0556555	0.292707	0.263848	0.0288584	0.0185518	0.000262925	1	30.0952	0.618394	3.2981	5.56555	29.2707	26.3848	2.88584	1.85518	0.0262925	100
9003	A	465183	4.48731e+06	0.263645	0.0027463	0.12633	0.118091	0.233436	0.211465	0.0384483	0.00549261	0.000345149	1	26.3645	0.27463	12.633	11.8091	23.3436	21.1465	3.84483	0.549261	0.0345149	100
9004	A	467065	4.4873e+06	0.282221	0.00178571	0.0104526	0.0104526	0.282221	0.400685	0.0104526	0.00129408	0.000434885	1	28.2221	0.178571	1.04526	1.04526	28.2221	40.0685	1.04526	0.129408	0.0434885	100
9034	A	464314	4.48565e+06	0.305026	0.00435752	0.0740778	0.0566477	0.257094	0.270166	0.0305026	0.00159299	0.000535334	1	30.5026	0.435752	7.40778	5.66477	25.7094	27.0166	3.05026	0.159299	0.0535334	100
9036	A	461477	4.48575e+06	0.409878	0.00294876	0.120899	0.0648728	0.171028	0.218209	0.00884629	0.00294876	0.00036904	1	40.9878	0.294876	12.0899	6.48728	17.1028	21.8209	0.884629	0.294876	0.036904	100
9076	A	460738	4.48165e+06	0.265878	0.00178571	0.0938391	0.0875832	0.303413	0.175166	0.0500475	0.0218958	0.000391394	1	26.5878	0.178571	9.38391	8.75832	30.3413	17.5166	5.00475	2.18958	0.0391394	100
9079	A	455895	4.4821e+06	0.412273	0.0204433	0.078366	0.0579227	0.18399	0.201026	0.0442938	0.00126149	0.000423932	1	41.2273	2.04433	7.8366	5.79227	18.399	20.1026	4.42938	0.126149	0.0423932	100
9126	A	457911	4.47752e+06	0.392771	0.00481928	0.108434	0.0554217	0.144578	0.255422	0.0313253	0.00481928	0.00240964	1	39.2771	0.481928	10.8434	5.54217	14.4578	25.5422	3.13253	0.481928	0.240964	100
9129	A	452886	4.47757e+06	0.315766	0.00178571	0.186302	0.0694685	0.227351	0.138937	0.0473649	0.0126306	0.00039449	1	31.5766	0.178571	18.6302	6.94685	22.7351	13.8937	4.73649	1.26306	0.039449	100
P27	N	487978	4.38226e+06	0.280732	0.287112	0.191408	0.159507	0.0382816	0.0010906	0.0319014	0.00957041	0.000396839	1	28.0732	28.7112	19.1408	15.9507	3.82816	0.10906	3.19014	0.957041	0.0396839	100
P26	N	489696	4.38226e+06	0.251969	0.623726	0.0619595	0.039241	0.0123919	0.00141334	0.00826127	0.000777429	0.00026126	1	25.1969	62.3726	6.19595	3.9241	1.23919	0.141334	0.826127	0.0777429	0.026126	100
P25	N	492272	4.38226e+06	0.139281	0.72964	0.0569784	0.0300719	0.0205755	0.00109273	0.00158273	0.0205755	0.000201993	1	13.9281	72.964	5.69784	3.00719	2.05755	0.109273	0.158273	2.05755	0.0201993	100
P24	N	493131	4.38226e+06	0.266218	0.529285	0.0724617	0.0614349	0.0488329	0.00108793	0.012602	0.00787627	0.000201106	1	26.6218	52.9285	7.24617	6.14349	4.88329	0.108793	1.2602	0.787627	0.0201106	100
P20	N	492284	4.39446e+06	0.240455	0.619044	0.076741	0.0460446	0.0127902	0.0010906	0.00255803	0.000955088	0.000320963	1	24.0455	61.9044	7.6741	4.60446	1.27902	0.10906	0.255803	0.0955088	0.0320963	100
P21	N	489706	4.39003e+06	0.214224	0.489374	0.112025	0.0668221	0.0648568	0.00134938	0.027515	0.0235843	0.000249435	1	21.4224	48.9374	11.2025	6.68221	6.48568	0.134938	2.7515	2.35843	0.0249435	100
P22	N	488844	4.3867e+06	0.174318	0.0996105	0.258987	0.206692	0.124513	0.0010906	0.0423344	0.0921397	0.00031455	1	17.4318	9.96105	25.8987	20.6692	12.4513	0.10906	4.23344	9.21397	0.031455	100
P23	N	487122	4.38337e+06	0.15237	0.79589	0.0291772	0.0178305	0.00117117	0.00111833	0.00162096	0.000615152	0.000206725	1	15.237	79.589	2.91772	1.78305	0.117117	0.111833	0.162096	0.0615152	0.0206725	100
P28	N	486261	4.38227e+06	0.236911	0.703211	0.0394851	0.0112815	0.00564073	0.00129151	0.00123017	0.000710415	0.000238739	1	23.6911	70.3211	3.94851	1.12815	0.564073	0.129151	0.123017	0.0710415	0.0238739	100
P29	N	486259	4.38116e+06	0.0773129	0.89232	0.0144962	0.00805343	0.00483206	0.00111106	0.00105829	0.000611156	0.000205383	1	7.73129	89.232	1.44962	0.805343	0.483206	0.111106	0.105829	0.0611156	0.0205383	100
P30	N	485398	4380046	0.121901	0.362316	0.206554	0.230257	0.0169307	0.0010906	0.0541781	0.00338613	0.00338613	1	12.1901	36.2316	20.6554	23.0257	1.69307	0.10906	5.41781	0.338613	0.338613	100
P32	N	483671	4.37561e+06	0.0418897	0.157892	0.219116	0.33834	0.11278	0.0010906	0.0837795	0.0354452	0.00966687	1	4.18897	15.7892	21.9116	33.834	11.278	0.10906	8.37795	3.54452	0.966687	100
P34	N	481944	4.37229e+06	0.0262023	0.0905169	0.100045	0.474023	0.161978	0.00163042	0.133393	0.0119101	0.000301387	1	2.62023	9.05169	10.0045	47.4023	16.1978	0.163042	13.3393	1.19101	0.0301387	100
P33	N	481093	4.37562e+06	0.0893191	0.643097	0.0615309	0.158789	0.0277881	0.00136007	0.0158789	0.00198487	0.000251411	1	8.93191	64.3097	6.15309	15.8789	2.77881	0.136007	1.58789	0.198487	0.0251411	100
P31	N	479383	4.37895e+06	0.155603	0.677985	0.0833589	0.0583512	0.0111145	0.0010906	0.0111145	0.00103422	0.000347556	1	15.5603	67.7985	8.33589	5.83512	1.11145	0.10906	1.11145	0.103422	0.0347556	100
P15	N	483713	4.39559e+06	0.107392	0.598326	0.130404	0.105858	0.0291492	0.00106059	0.0245467	0.00306834	0.000196052	1	10.7392	59.8326	13.0404	10.5858	2.91492	0.106059	2.45467	0.306834	0.0196052	100
P16	N	482851	4.39337e+06	0.153254	0.71366	0.0663338	0.0434601	0.0114369	0.00155975	0.00914949	0.000857961	0.000288323	1	15.3254	71.366	6.63338	4.34601	1.14369	0.155975	0.914949	0.0857961	0.0288323	100
P17	N	481991	4.39226e+06	0.106916	0.605855	0.124735	0.0890963	0.0445482	0.0010906	0.0178193	0.00890963	0.00103083	1	10.6916	60.5855	12.4735	8.90963	4.45482	0.10906	1.78193	0.890963	0.103083	100
P18	N	480270	4.39005e+06	0.190582	0.708388	0.0683217	0.0233732	0.00179794	0.0012355	0.00539382	0.000679605	0.000228385	1	19.0582	70.8388	6.83217	2.33732	0.179794	0.12355	0.539382	0.0679605	0.0228385	100
P19	N	478548	4.38783e+06	0.171636	0.710718	0.0846093	0.0265915	0.00117117	0.00164676	0.00241741	0.000905823	0.000304407	1	17.1636	71.0718	8.46093	2.65915	0.117117	0.164676	0.241741	0.0905823	0.0304407	100
P35	N	471631	4.37343e+06	0.0531328	0.870049	0.0232456	0.0431704	0.0066416	0.0010906	0.00103011	0.00122733	0.000412451	1	5.31328	87.0049	2.32456	4.31704	0.66416	0.10906	0.103011	0.122733	0.0412451	100
P36	N	477623	4.36453e+06	0.0553029	0.0307239	0.0829544	0.531523	0.144402	0.0010906	0.122895	0.0307239	0.000384242	1	5.53029	3.07239	8.29544	53.1523	14.4402	0.10906	12.2895	3.07239	0.0384242	100
